# Supplementary material for: Catalyst-free synthesis of 2-aryl-1,2-dihydro-quinazolin-4(1H)-thiones from 2-aminobenzothio-amides and aldehydes in water
Source: Royal Society of Chemistry journal article supplement (doi:10.1039/c4ob02207f), 2014-11-19

## Supporting Information

**General remarks:** All Chemicals were commercial available and were used without further purification. Dry DMF over molecular sieve and distilled water were used as solvents. NMR-data was recorded by Bruker AVANCE 300 III, Bruker AVANCE 250 III, Bruker ARX 300 and Bruker ARX 400 spectrometers.  $^{13}\text{C}$ - and  $^1\text{H}$ -spectra were referenced to residue solvent signals. Peaks were characterized as singlet (*s*), doublet (*d*), doublet of doublet (*dd*), triplet (*t*), doublet of triplets (*dt*), quartet (*q*) and multiplet (*m*). Gas-chromatographie-mass-analysis was measured by an Agilent HP-5890 with Agilent HP-5973 Mass Selective Detector (EI) and HP-5-capillary column using helium as carrier gas. Elemental analysis was performed on a Flash EA 112 and IR-spectra were recorded on a Nicolet 380 FT-IR spectrometer. IR-bands are classified as strong (*s*), medium (*m*) and weak (*w*). Column-chromatographie was carried out using Merck 60 Silica-Gel (0.043 - 0.06 mm) and distilled solvents were used.

### General experimental procedure:

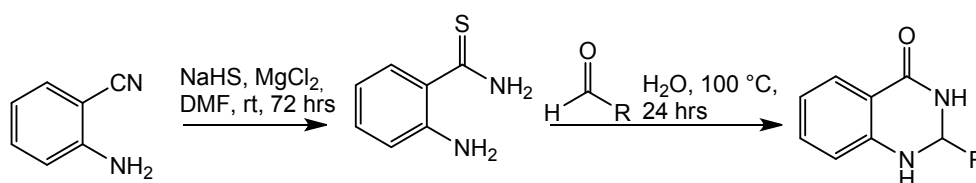

### 2-Aminobenzothioamide (1a):

| Parameter                 | Value                                               |
|---------------------------|-----------------------------------------------------|
| 1 Data File Name          | C:/Users/Tom Brunzel/Desktop/NMR/140516.u320/10/fid |
| 2 Title                   | 140516.u320                                         |
| 3 Comment                 | Brunzel TB5U 1H DMSO                                |
| 4 Origin                  | Bruker BioSpin GmbH                                 |
| 5 Owner                   | nmsru                                               |
| 6 Site                    |                                                     |
| 7 Spectrometer            | spect                                               |
| 8 Author                  |                                                     |
| 9 Solvent                 | DMSO                                                |
| 10 Temperature            | 298.2                                               |
| 11 Pulse Sequence         | zg30                                                |
| 12 Number of Scans        | 16                                                  |
| 13 Receiver Gain          | 114                                                 |
| 14 Relaxation Delay       | 1.0000                                              |
| 15 Pulse Width            | 10.0000                                             |
| 16 Acquisition Time       | 5.2954                                              |
| 17 Acquisition Date       | 2014-05-16T13:54:00                                 |
| 18 Modification Date      | 2014-05-16T12:54:16                                 |
| 19 Spectrometer Frequency | 300.13                                              |
| 20 Spectral Width         | 6188.1                                              |
| 21 Lowest Frequency       | -1259.2                                             |
| 22 Nucleus                | $^1\text{H}$                                        |
| 23 Acquired Size          | 32768                                               |
| 24 Spectral Size          | 65536                                               |

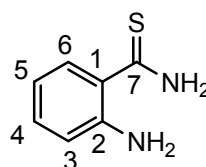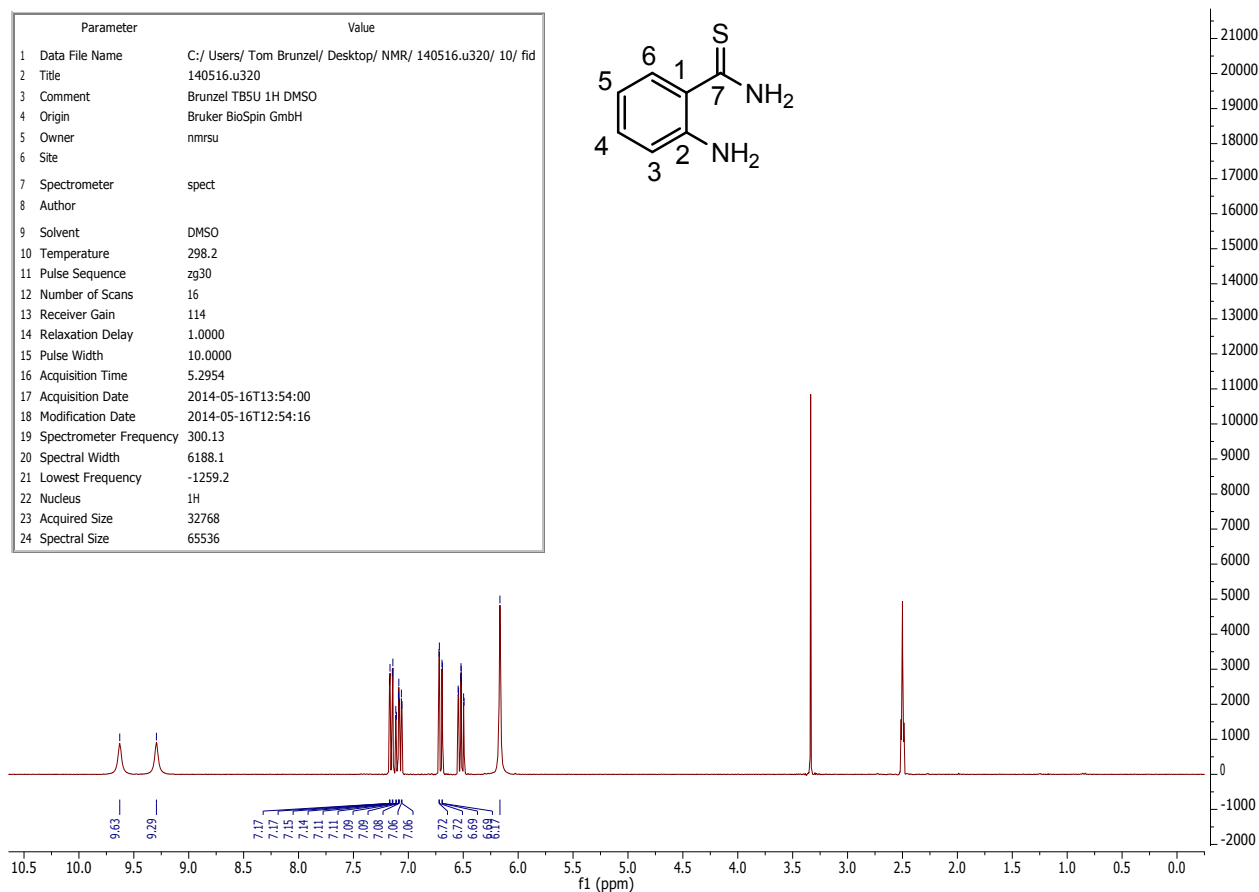

| Parameter                 | Value                                           |
|---------------------------|-------------------------------------------------|
| 1 Data File Name          | C:/ Users/ soscha/ Desktop/ 140515.210/ 11/ fid |
| 2 Title                   | 140515.210.11.fid                               |
| 3 Comment                 | Brunzel TB51 13C DMSO                           |
| 4 Origin                  | Bruker BioSpin GmbH                             |
| 5 Owner                   | nmr                                             |
| 6 Spectrometer            | spect                                           |
| 7 Author                  |                                                 |
| 8 Solvent                 | DMSO                                            |
| 9 Temperature             | 298.0                                           |
| 10 Pulse Sequence         | zgpg30                                          |
| 11 Experiment             | 1D                                              |
| 12 Number of Scans        | 1024                                            |
| 13 Spectrometer Frequency | 62.90                                           |
| 14 Spectral Width         | 15000.0                                         |
| 15 Lowest Frequency       | -1238.4                                         |
| 16 Nucleus                | 13C                                             |
| 17 Acquired Size          | 32768                                           |
| 18 Spectral Size          | 65536                                           |

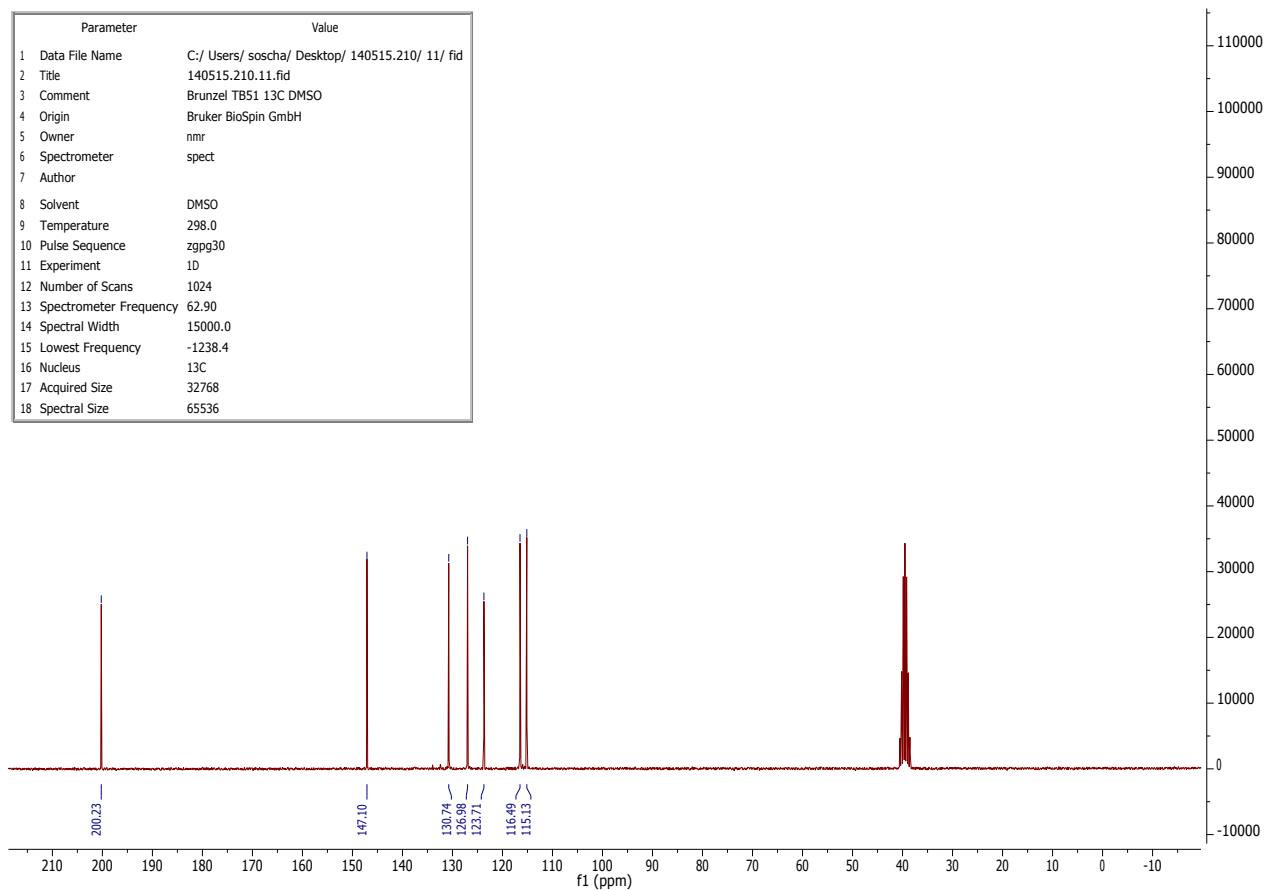

## 2-Amino-5-chlorobenzothioamide (1b):

| Parameter                 | Value                                                      |
|---------------------------|------------------------------------------------------------|
| 1 Data File Name          | C:/ Users/ Tom Brunzel/ Desktop/ NMR/ 140616.u316/ 10/ fid |
| 2 Title                   | 140616.u316                                                |
| 3 Comment                 | Brunzel TB33 1H DMSO                                       |
| 4 Origin                  | Bruker BioSpin GmbH                                        |
| 5 Owner                   | nmsu                                                       |
| 6 Site                    |                                                            |
| 7 Spectrometer            | spect                                                      |
| 8 Author                  |                                                            |
| 9 Solvent                 | DMSO                                                       |
| 10 Temperature            | 298.2                                                      |
| 11 Pulse Sequence         | zg30                                                       |
| 12 Number of Scans        | 16                                                         |
| 13 Receiver Gain          | 114                                                        |
| 14 Relaxation Delay       | 1.0000                                                     |
| 15 Pulse Width            | 10.0000                                                    |
| 16 Acquisition Time       | 5.2954                                                     |
| 17 Acquisition Date       | 2014-06-16T11:42:00                                        |
| 18 Modification Date      | 2014-06-16T10:42:44                                        |
| 19 Spectrometer Frequency | 300.13                                                     |
| 20 Spectral Width         | 6188.1                                                     |
| 21 Lowest Frequency       | -1258.6                                                    |
| 22 Nucleus                | 1H                                                         |
| 23 Acquired Size          | 32768                                                      |
| 24 Spectral Size          | 65536                                                      |

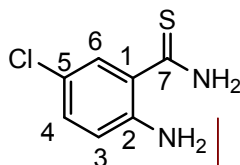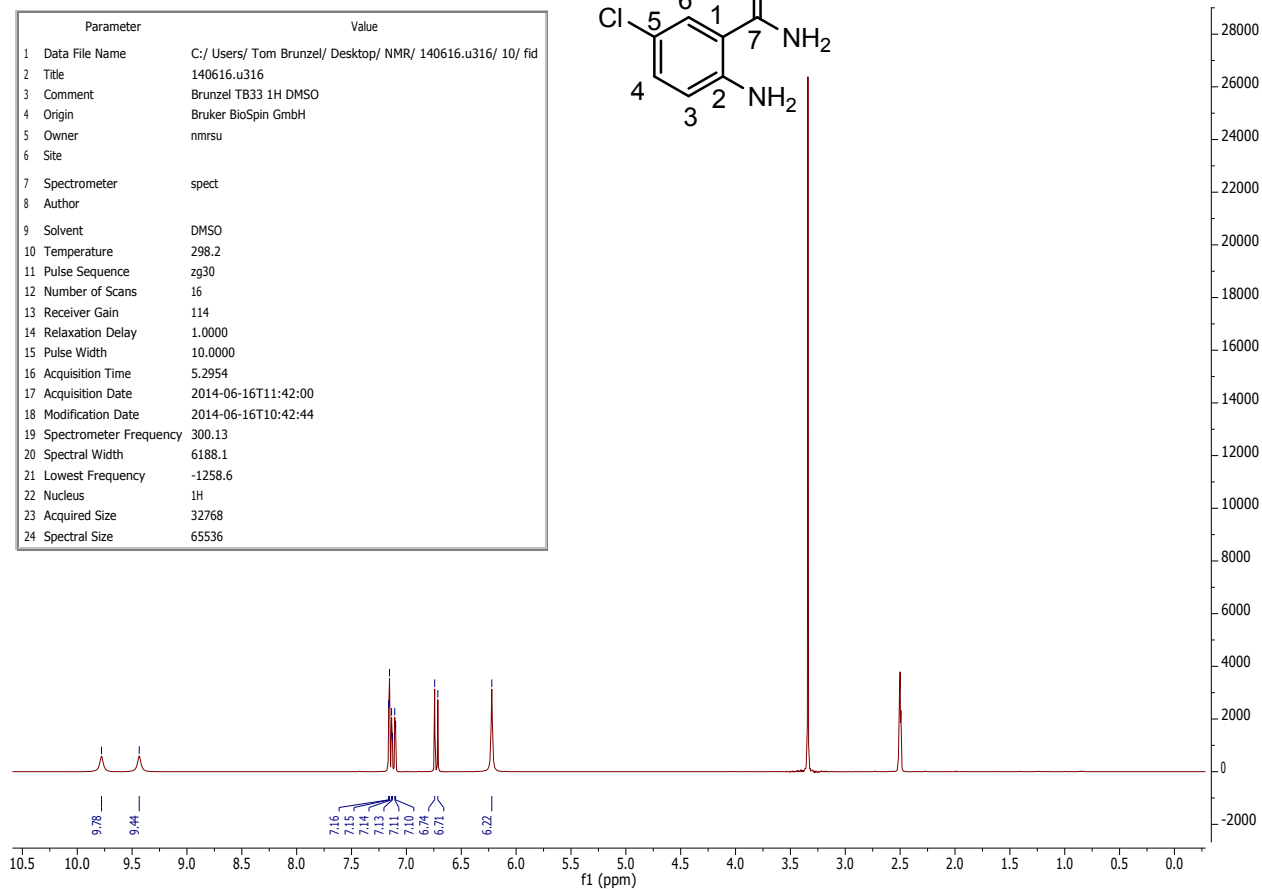

| Parameter                 | Value                                              |
|---------------------------|----------------------------------------------------|
| 1 Data File Name          | C:/Users/Tom Brunzel/Desktop/NMR/140616.204/10/fid |
| 2 Title                   | 140616.20                                          |
| 3 Comment                 | Brunzel TB33C 13C DMSO                             |
| 4 Origin                  | Bruker BioSpin GmbH                                |
| 5 Owner                   | nmr                                                |
| 6 Site                    |                                                    |
| 7 Spectrometer            | spect                                              |
| 8 Author                  |                                                    |
| 9 Solvent                 | DMSO                                               |
| 10 Temperature            | 298.0                                              |
| 11 Pulse Sequence         | zgpg30                                             |
| 12 Number of Scans        | 1024                                               |
| 13 Receiver Gain          | 2050                                               |
| 14 Relaxation Delay       | 2.0000                                             |
| 15 Pulse Width            | 10.0000                                            |
| 16 Acquisition Time       | 2.1846                                             |
| 17 Acquisition Date       | 2014-06-16T16:54:00                                |
| 18 Modification Date      | 2014-06-16T15:55:00                                |
| 19 Spectrometer Frequency | 62.90                                              |
| 20 Spectral Width         | 15000.0                                            |
| 21 Lowest Frequency       | -1238.8                                            |
| 22 Nucleus                | 13C                                                |
| 23 Acquired Size          | 32768                                              |
| 24 Spectral Size          | 65536                                              |

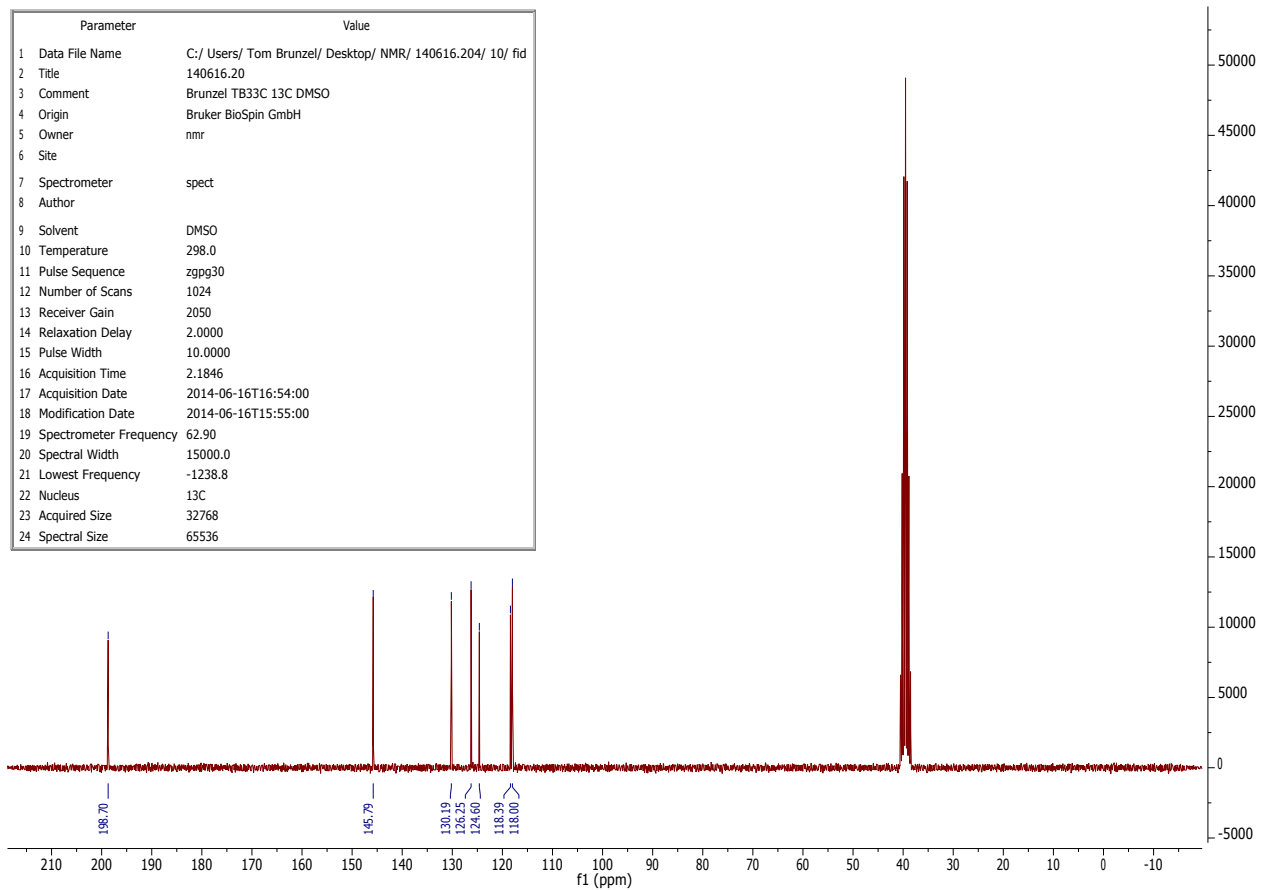

## 2-Amino-5-nitrobenzothioamide (1c):

| Parameter                 | Value                                              |
|---------------------------|----------------------------------------------------|
| 1 Data File Name          | C:/Users/Tom Brunzel/Desktop/NMR/140618.506/10/fid |
| 2 Title                   | 140618.51                                          |
| 3 Comment                 | Brunzel TB37 1H DMSO                               |
| 4 Origin                  | Bruker BioSpin GmbH                                |
| 5 Owner                   | Administrator                                      |
| 6 Site                    |                                                    |
| 7 Spectrometer            | spect                                              |
| 8 Author                  |                                                    |
| 9 Solvent                 | DMSO                                               |
| 10 Temperature            | 300.0                                              |
| 11 Pulse Sequence         | zg30                                               |
| 12 Number of Scans        | 16                                                 |
| 13 Receiver Gain          | 128                                                |
| 14 Relaxation Delay       | 1.0000                                             |
| 15 Pulse Width            | 9.8000                                             |
| 16 Acquisition Time       | 3.1720                                             |
| 17 Acquisition Date       | 2014-06-18T23:25:00                                |
| 18 Modification Date      | 2014-06-18T22:26:02                                |
| 19 Spectrometer Frequency | 500.13                                             |
| 20 Spectral Width         | 10330.6                                            |
| 21 Lowest Frequency       | -2081.9                                            |
| 22 Nucleus                | 1H                                                 |
| 23 Acquired Size          | 32768                                              |
| 24 Spectral Size          | 65536                                              |

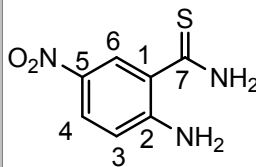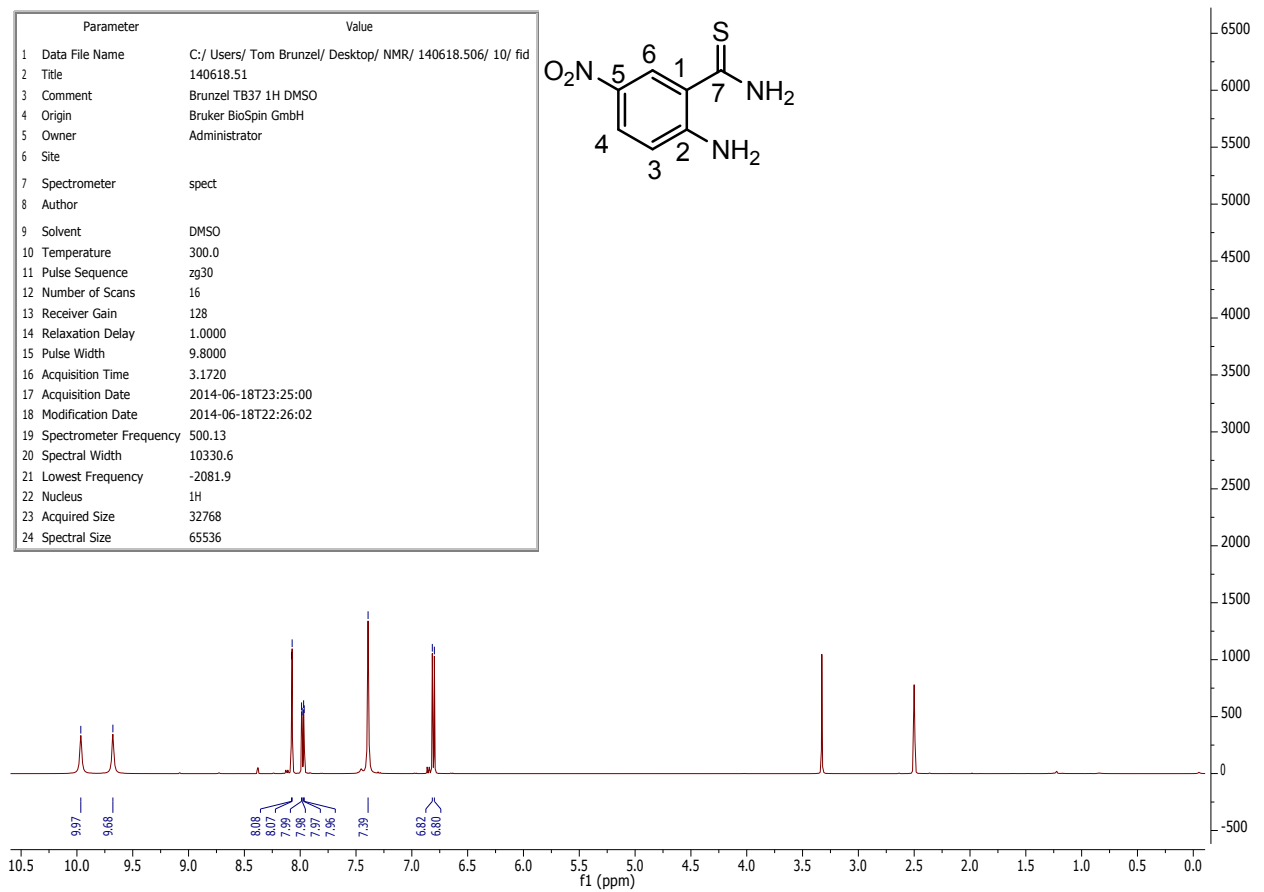

| Parameter                 | Value                                                     |
|---------------------------|-----------------------------------------------------------|
| 1 Data File Name          | C:/ Users/ Tom Brunzel/ Desktop/ NMR/ 140618.506/ 11/ fid |
| 2 Title                   | 140618.51                                                 |
| 3 Comment                 | Brunzel TB37 13C DMSO                                     |
| 4 Origin                  | Bruker BioSpin GmbH                                       |
| 5 Owner                   | Administrator                                             |
| 6 Site                    |                                                           |
| 7 Spectrometer            | spect                                                     |
| 8 Author                  |                                                           |
| 9 Solvent                 | DMSO                                                      |
| 10 Temperature            | 300.0                                                     |
| 11 Pulse Sequence         | zgpg30                                                    |
| 12 Number of Scans        | 1024                                                      |
| 13 Receiver Gain          | 16384                                                     |
| 14 Relaxation Delay       | 2.0000                                                    |
| 15 Pulse Width            | 9.0000                                                    |
| 16 Acquisition Time       | 1.0912                                                    |
| 17 Acquisition Date       | 2014-06-19T00:22:00                                       |
| 18 Modification Date      | 2014-06-18T23:22:34                                       |
| 19 Spectrometer Frequency | 125.76                                                    |
| 20 Spectral Width         | 30030.0                                                   |
| 21 Lowest Frequency       | -2500.7                                                   |
| 22 Nucleus                | 13C                                                       |
| 23 Acquired Size          | 32768                                                     |
| 24 Spectral Size          | 65536                                                     |

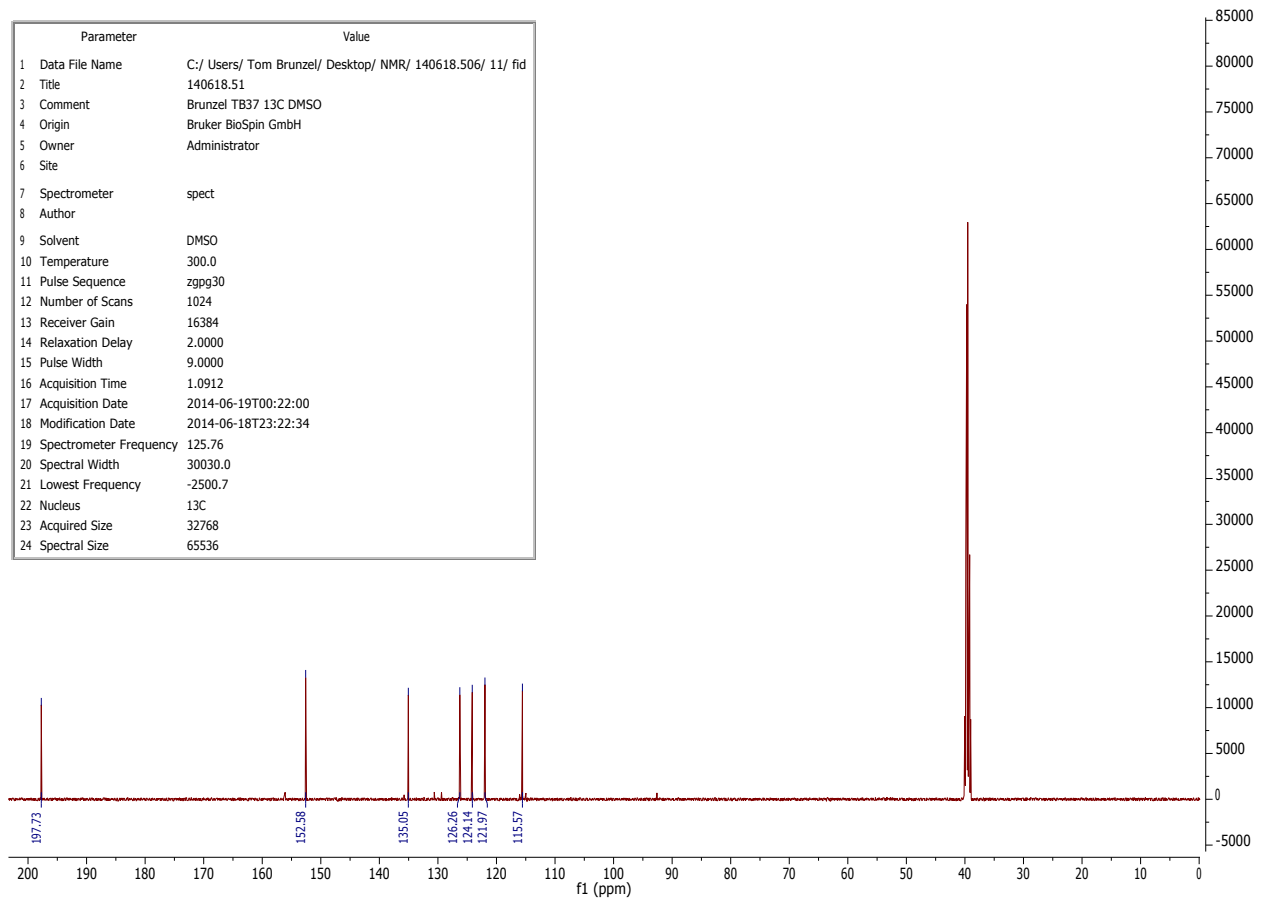

## 2-Amino-6-fluorobenzothioamide (1d):

| Parameter                 | Value                                                      |
|---------------------------|------------------------------------------------------------|
| 1 Data File Name          | C:/ Users/ Tom Brunzel/ Desktop/ NMR/ 140613.u306/ 10/ fid |
| 2 Title                   | 140613.u306                                                |
| 3 Comment                 | Brunzel ??? 1H DMSO                                        |
| 4 Origin                  | Bruker BioSpin GmbH                                        |
| 5 Owner                   | nmsu                                                       |
| 6 Site                    |                                                            |
| 7 Spectrometer            | spect                                                      |
| 8 Author                  |                                                            |
| 9 Solvent                 | DMSO                                                       |
| 10 Temperature            | 298.2                                                      |
| 11 Pulse Sequence         | zg30                                                       |
| 12 Number of Scans        | 16                                                         |
| 13 Receiver Gain          | 90                                                         |
| 14 Relaxation Delay       | 1.0000                                                     |
| 15 Pulse Width            | 10.0000                                                    |
| 16 Acquisition Time       | 5.2954                                                     |
| 17 Acquisition Date       | 2014-06-13T11:38:00                                        |
| 18 Modification Date      | 2014-06-13T10:38:14                                        |
| 19 Spectrometer Frequency | 300.13                                                     |
| 20 Spectral Width         | 6188.1                                                     |
| 21 Lowest Frequency       | -1266.7                                                    |
| 22 Nucleus                | 1H                                                         |
| 23 Acquired Size          | 32768                                                      |
| 24 Spectral Size          | 65536                                                      |

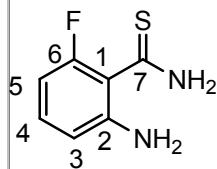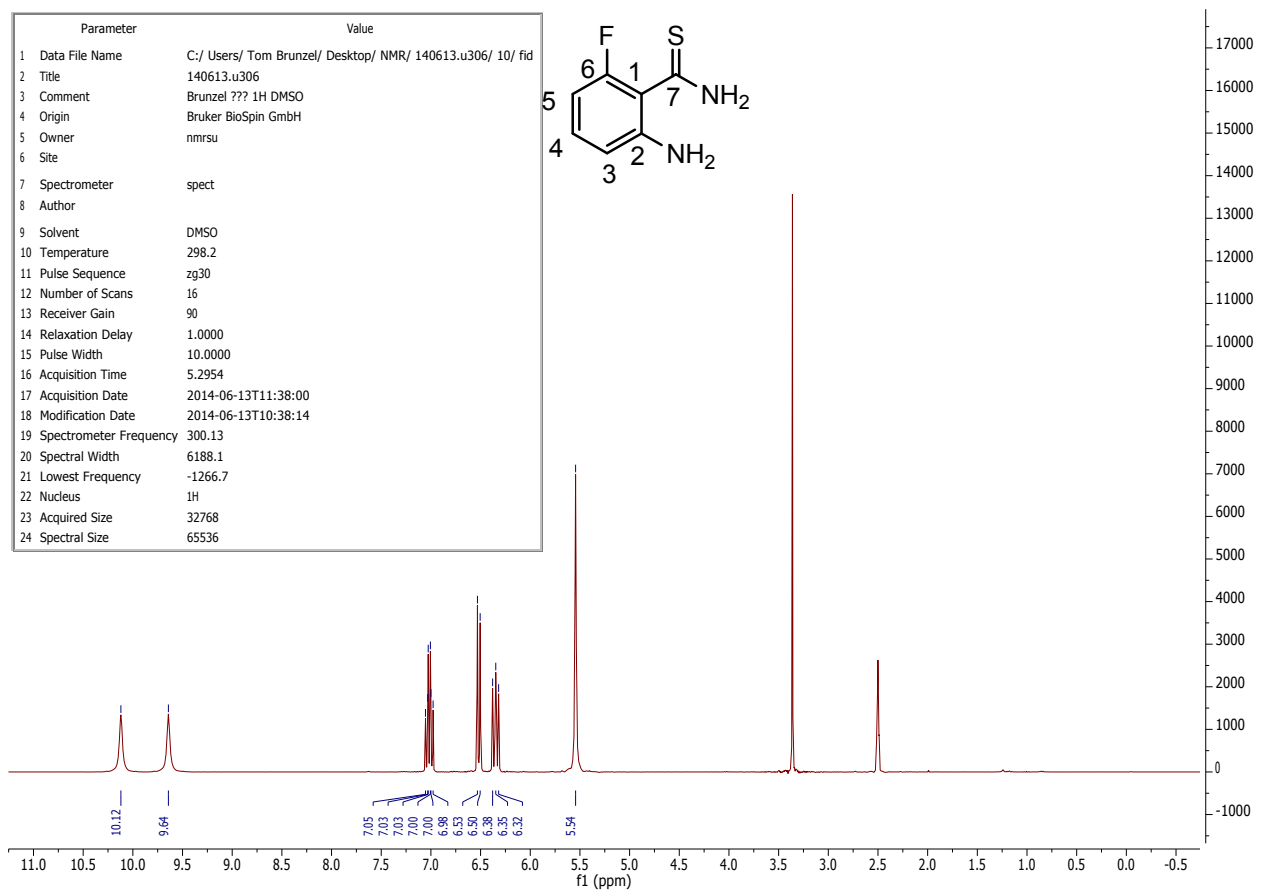

| Parameter                 | Value                                              |
|---------------------------|----------------------------------------------------|
| 1 Data File Name          | C:/Users/Tom Brunzel/Desktop/NMR/140616.205/10/fid |
| 2 Title                   | 140616.20                                          |
| 3 Comment                 | Brunzel TB34C 13C DMSO                             |
| 4 Origin                  | Bruker BioSpin GmbH                                |
| 5 Owner                   | nmr                                                |
| 6 Site                    |                                                    |
| 7 Spectrometer            | spect                                              |
| 8 Author                  |                                                    |
| 9 Solvent                 | DMSO                                               |
| 10 Temperature            | 298.0                                              |
| 11 Pulse Sequence         | zgpg30                                             |
| 12 Number of Scans        | 1024                                               |
| 13 Receiver Gain          | 2050                                               |
| 14 Relaxation Delay       | 2.0000                                             |
| 15 Pulse Width            | 10.0000                                            |
| 16 Acquisition Time       | 2.1846                                             |
| 17 Acquisition Date       | 2014-06-16T18:34:00                                |
| 18 Modification Date      | 2014-06-16T17:35:16                                |
| 19 Spectrometer Frequency | 62.90                                              |
| 20 Spectral Width         | 15000.0                                            |
| 21 Lowest Frequency       | -1238.0                                            |
| 22 Nucleus                | 13C                                                |
| 23 Acquired Size          | 32768                                              |
| 24 Spectral Size          | 65536                                              |

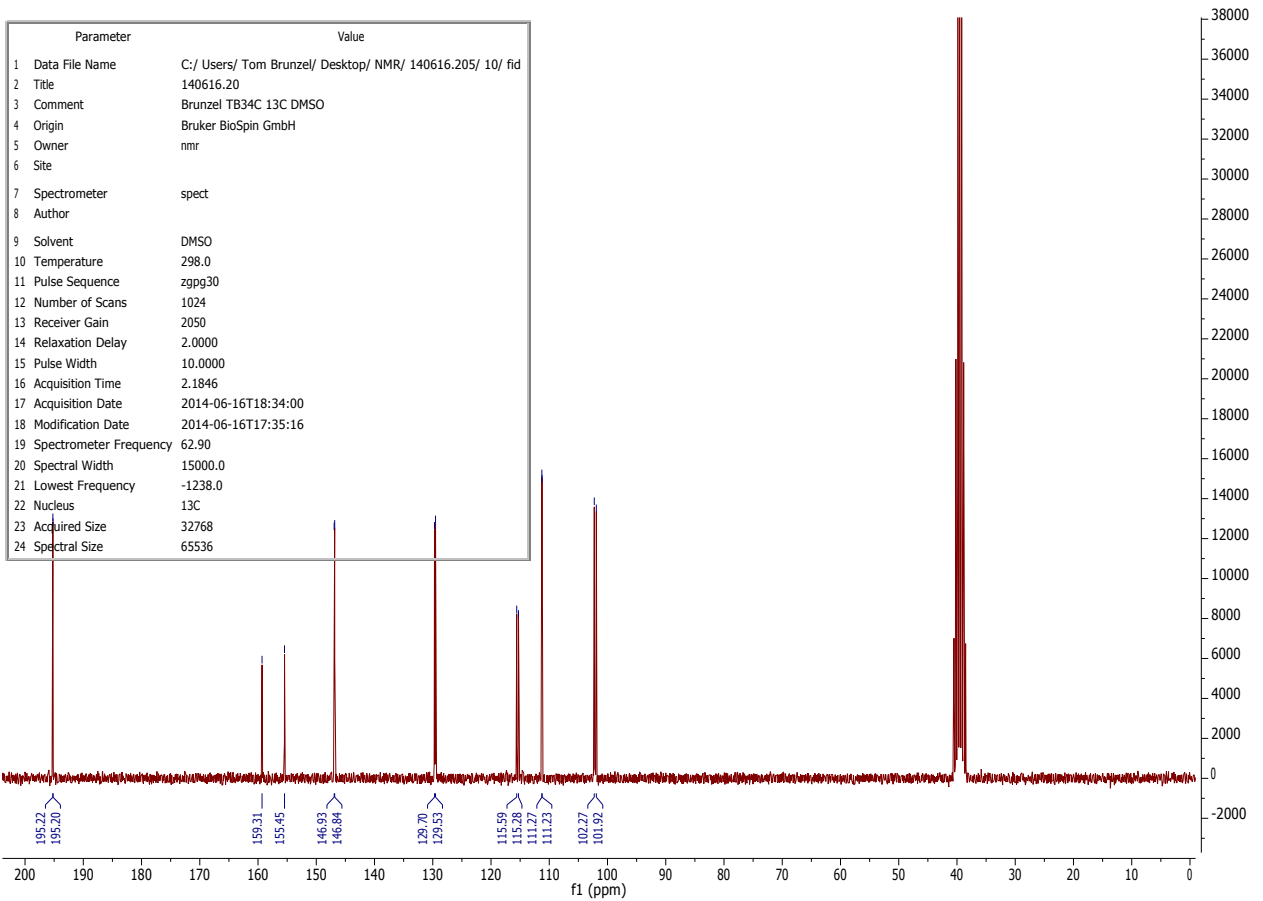

| Parameter                 | Value                                               |
|---------------------------|-----------------------------------------------------|
| 1 Data File Name          | C:/Users/Tom Brunzel/Desktop/NMR/140613.u306/11/fid |
| 2 Title                   | 140613.u306                                         |
| 3 Comment                 | Brunzel ??? 19F DMSO                                |
| 4 Origin                  | Bruker BioSpin GmbH                                 |
| 5 Owner                   | nmr                                                 |
| 6 Site                    |                                                     |
| 7 Spectrometer            | spect                                               |
| 8 Author                  |                                                     |
| 9 Solvent                 | DMSO                                                |
| 10 Temperature            | 298.3                                               |
| 11 Pulse Sequence         | zgfhgq                                              |
| 12 Number of Scans        | 64                                                  |
| 13 Receiver Gain          | 2050                                                |
| 14 Relaxation Delay       | 1.0000                                              |
| 15 Pulse Width            | 10.0000                                             |
| 16 Acquisition Time       | 0.9787                                              |
| 17 Acquisition Date       | 2014-06-13T11:41:00                                 |
| 18 Modification Date      | 2014-06-13T10:41:54                                 |
| 19 Spectrometer Frequency | 282.40                                              |
| 20 Spectral Width         | 66964.3                                             |
| 21 Lowest Frequency       | -61722.4                                            |
| 22 Nucleus                | 19F                                                 |
| 23 Acquired Size          | 65536                                               |
| 24 Spectral Size          | 131072                                              |

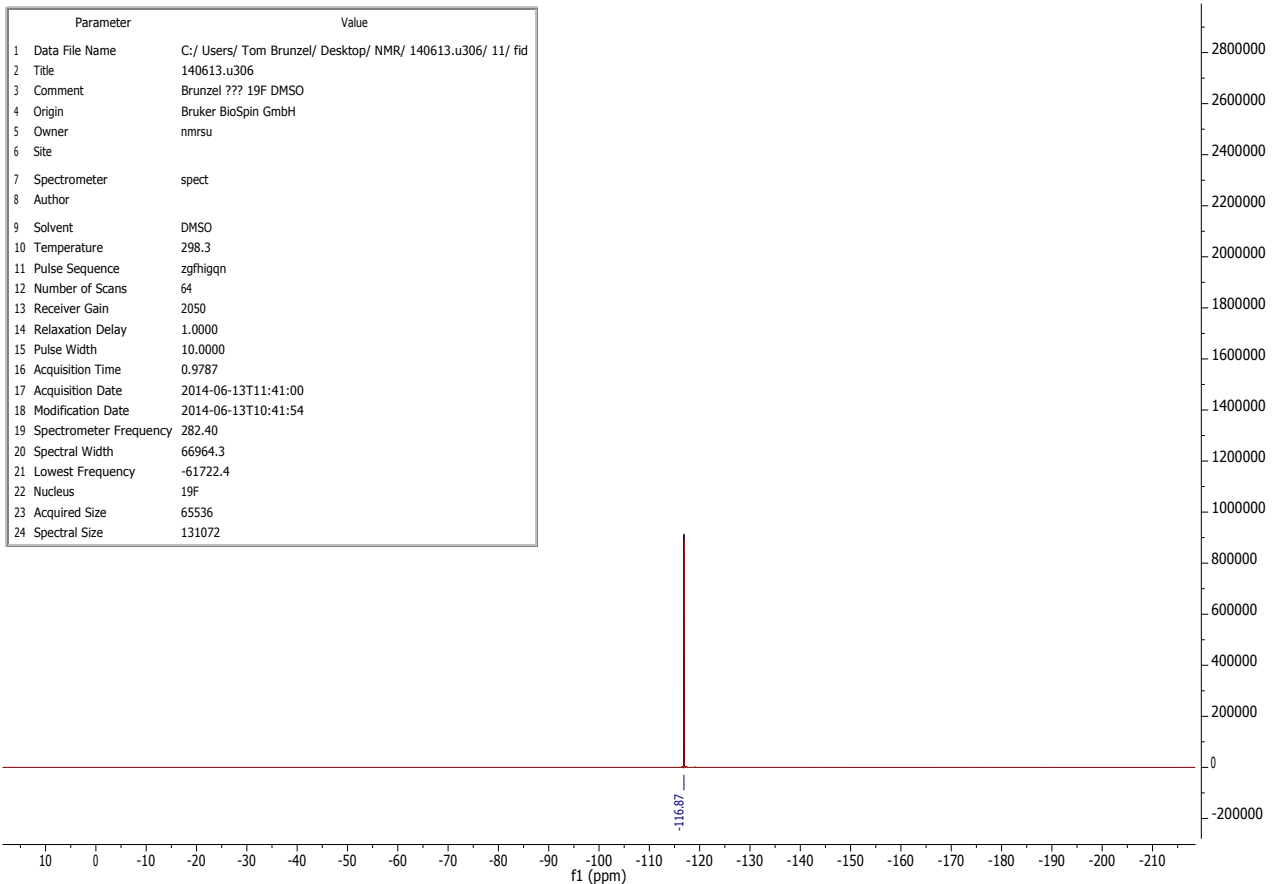

## 2-Aminopyridine-3-carbothioamide (1e):

| Parameter                 | Value                                                                                                 |
|---------------------------|-------------------------------------------------------------------------------------------------------|
| 1 Data File Name          | C:/Users/Tom Brunzel/Studium Chemie/6. Semester/Bachelorarbeit/Bachelorarbeit/NMR/140701.u303/10/ fid |
| 2 Title                   | 140701.u303                                                                                           |
| 3 Comment                 | Brunzel TB39 1H DMSO                                                                                  |
| 4 Origin                  | Bruker BioSpin GmbH                                                                                   |
| 5 Owner                   | nmsu                                                                                                  |
| 6 Site                    |                                                                                                       |
| 7 Spectrometer            | spect                                                                                                 |
| 8 Author                  |                                                                                                       |
| 9 Solvent                 | DMSO                                                                                                  |
| 10 Temperature            | 298.2                                                                                                 |
| 11 Pulse Sequence         | zg30                                                                                                  |
| 12 Number of Scans        | 16                                                                                                    |
| 13 Receiver Gain          | 114                                                                                                   |
| 14 Relaxation Delay       | 1.0000                                                                                                |
| 15 Pulse Width            | 10.0000                                                                                               |
| 16 Acquisition Time       | 5.2954                                                                                                |
| 17 Acquisition Date       | 2014-07-01T10:48:00                                                                                   |
| 18 Modification Date      | 2014-07-01T09:48:16                                                                                   |
| 19 Spectrometer Frequency | 300.13                                                                                                |
| 20 Spectral Width         | 6188.1                                                                                                |
| 21 Lowest Frequency       | -1269.7                                                                                               |
| 22 Nucleus                | 1H                                                                                                    |
| 23 Acquired Size          | 32768                                                                                                 |
| 24 Spectral Size          | 65536                                                                                                 |

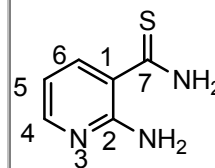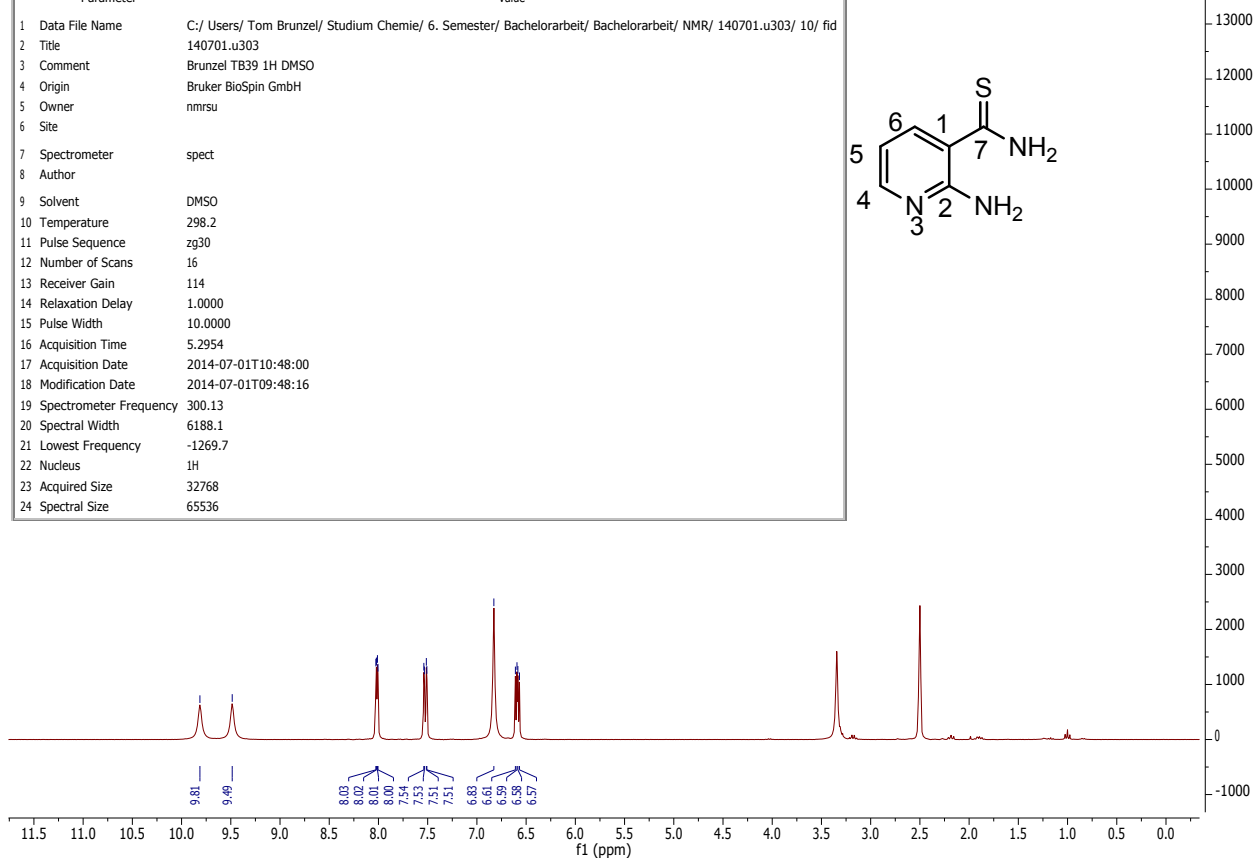

| Parameter                 | Value                                                                                                 |
|---------------------------|-------------------------------------------------------------------------------------------------------|
| 1 Data File Name          | C:/Users/Tom Brunzel/Studium Chemie/6. Semester/Bachelorarbeit/Bachelorarbeit/NMR/140701.u303/11/ fid |
| 2 Title                   | 140701.u303                                                                                           |
| 3 Comment                 | Brunzel TB39 13C DMSO                                                                                 |
| 4 Origin                  | Bruker BioSpin GmbH                                                                                   |
| 5 Owner                   | nmsu                                                                                                  |
| 6 Site                    |                                                                                                       |
| 7 Spectrometer            | spect                                                                                                 |
| 8 Author                  |                                                                                                       |
| 9 Solvent                 | DMSO                                                                                                  |
| 10 Temperature            | 298.5                                                                                                 |
| 11 Pulse Sequence         | zgpg30                                                                                                |
| 12 Number of Scans        | 1024                                                                                                  |
| 13 Receiver Gain          | 2050                                                                                                  |
| 14 Relaxation Delay       | 2.0000                                                                                                |
| 15 Pulse Width            | 10.0000                                                                                               |
| 16 Acquisition Time       | 1.8176                                                                                                |
| 17 Acquisition Date       | 2014-07-01T21:14:00                                                                                   |
| 18 Modification Date      | 2014-07-01T20:14:10                                                                                   |
| 19 Spectrometer Frequency | 75.47                                                                                                 |
| 20 Spectral Width         | 18028.8                                                                                               |
| 21 Lowest Frequency       | -1510.9                                                                                               |
| 22 Nucleus                | 13C                                                                                                   |
| 23 Acquired Size          | 32768                                                                                                 |
| 24 Spectral Size          | 65536                                                                                                 |

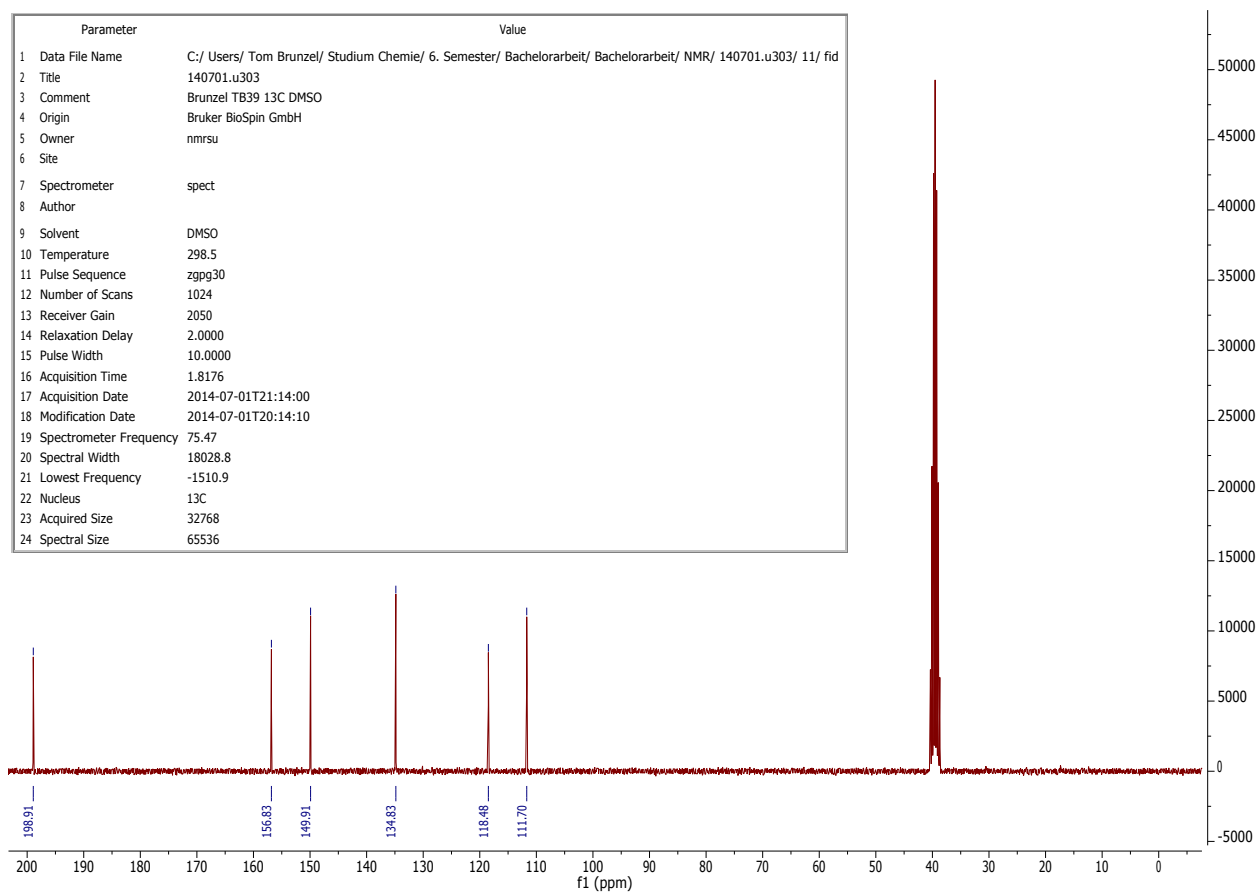

## 2-Amino-4-chlorobenzothioamide (1f):

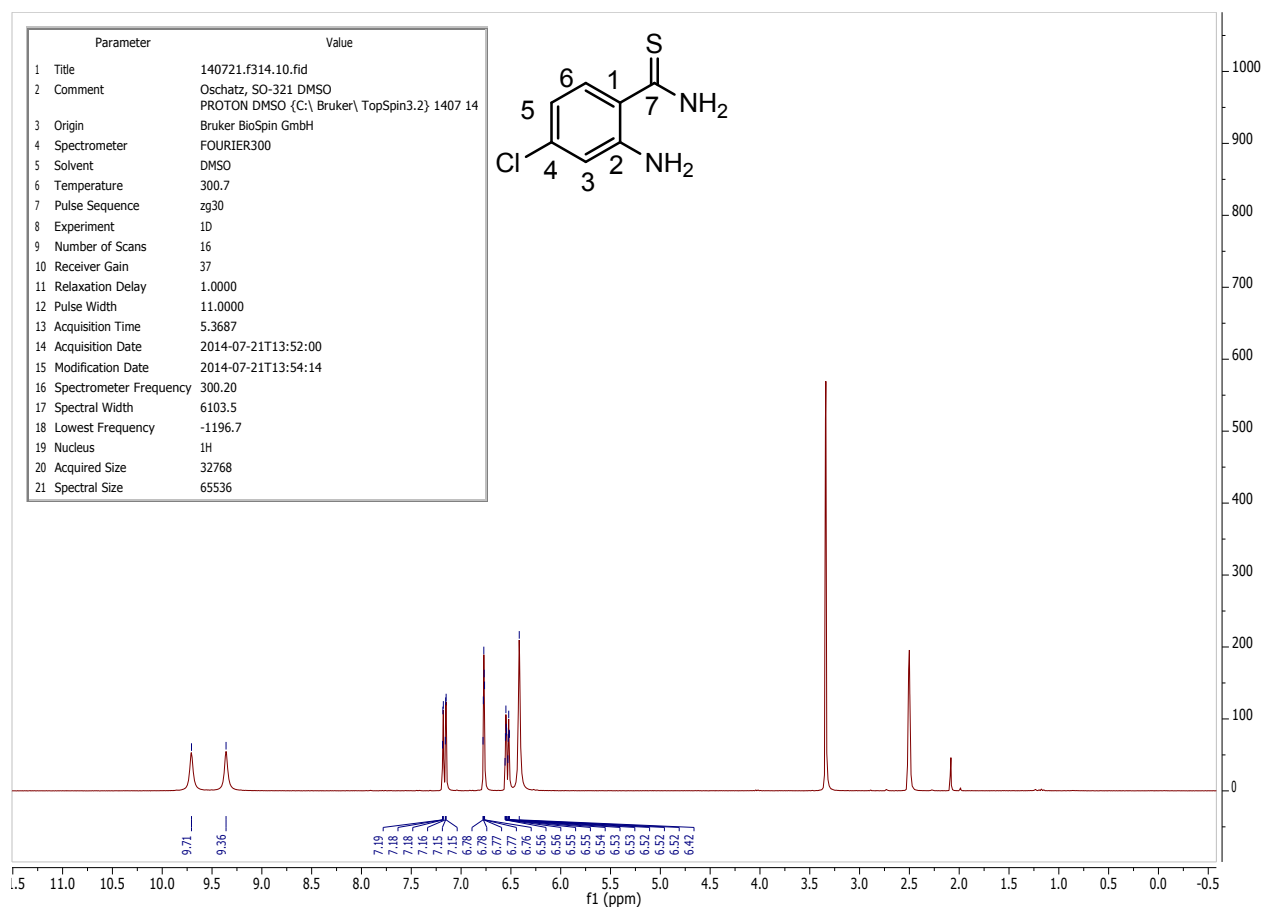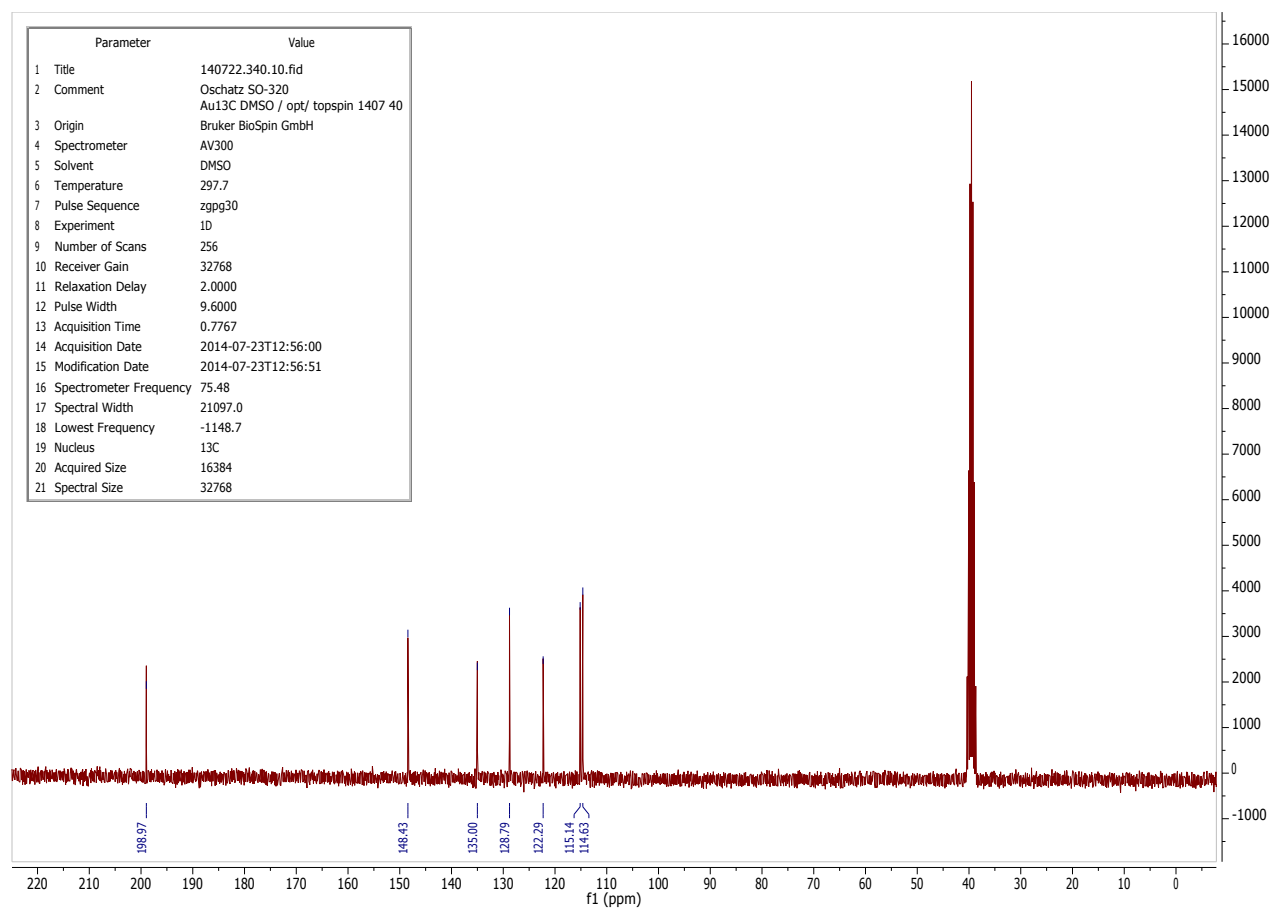

## 2-Amino-6-chlorobenzothioamide (1g):

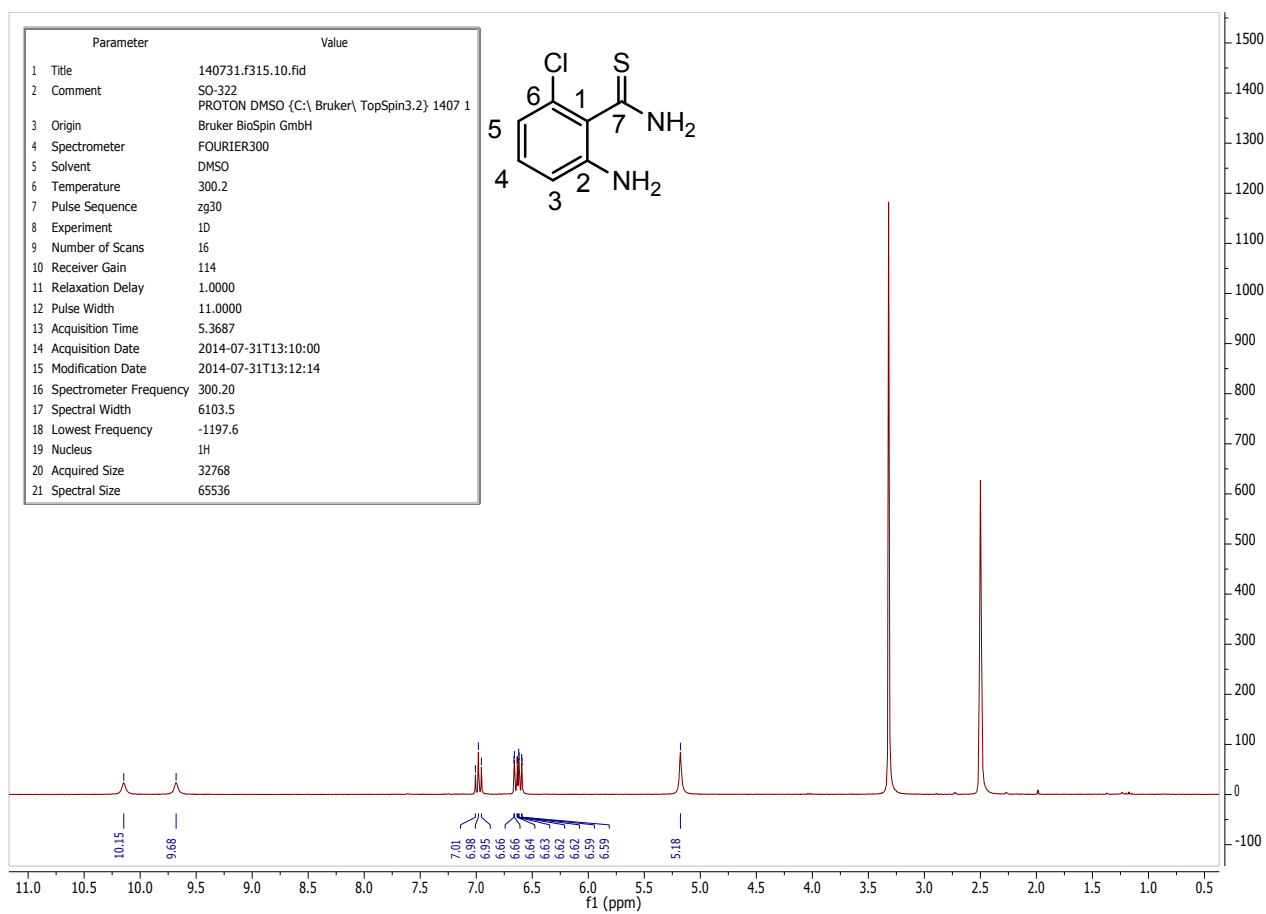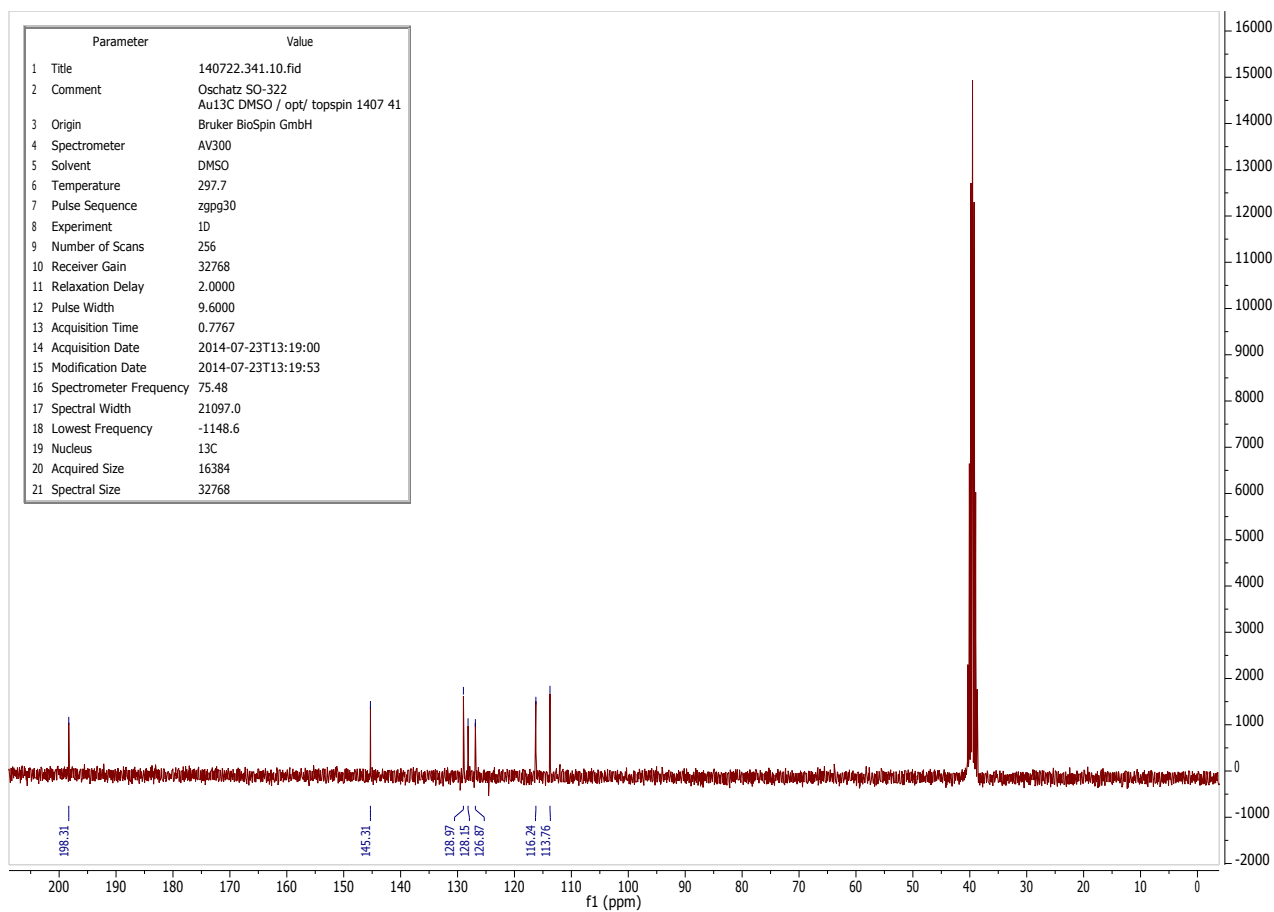



## 2-Aminothiophene-3-carbothioamide (1h):

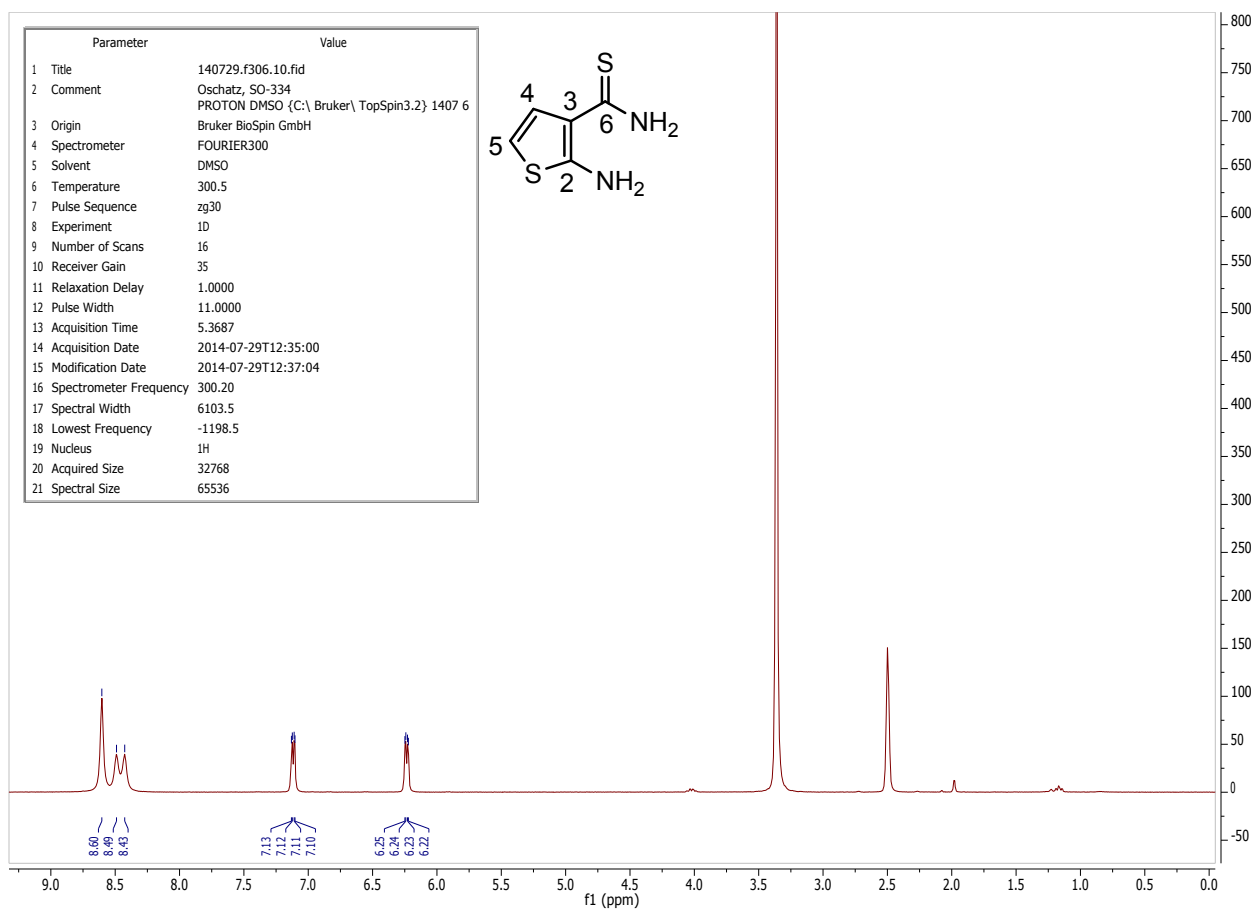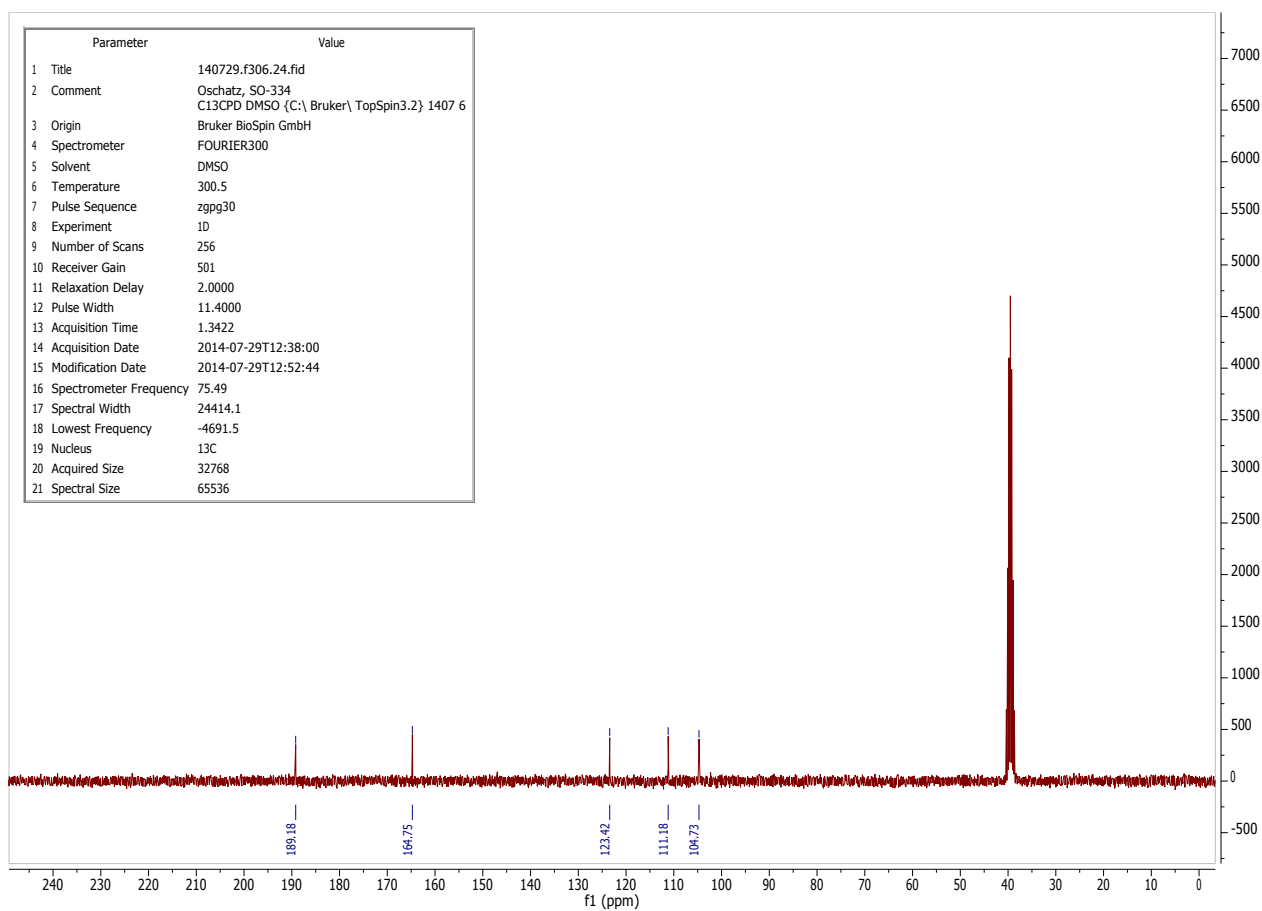

## 2-Phenyl-2,3-dihydroquinazoline-4(1H)-thione (2a):

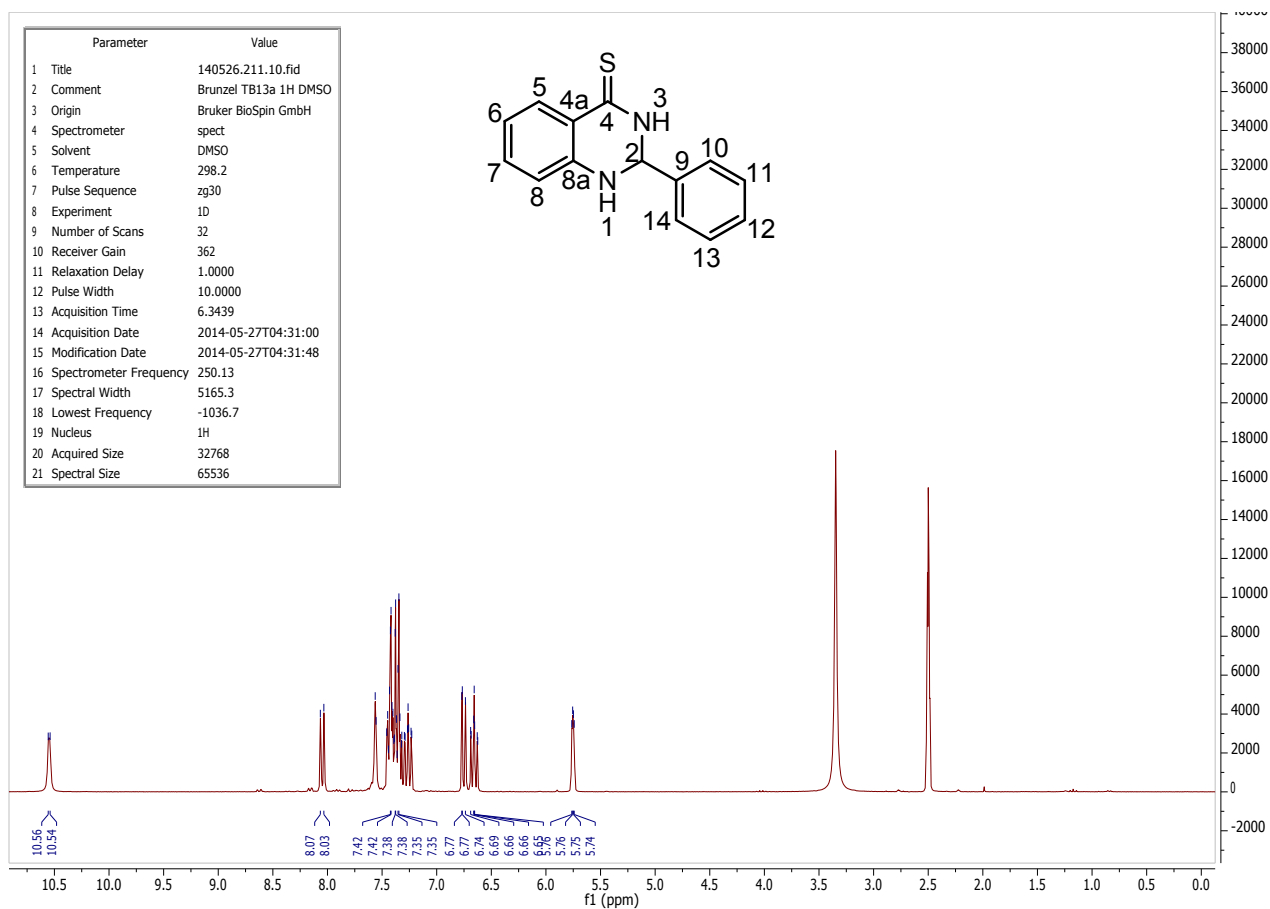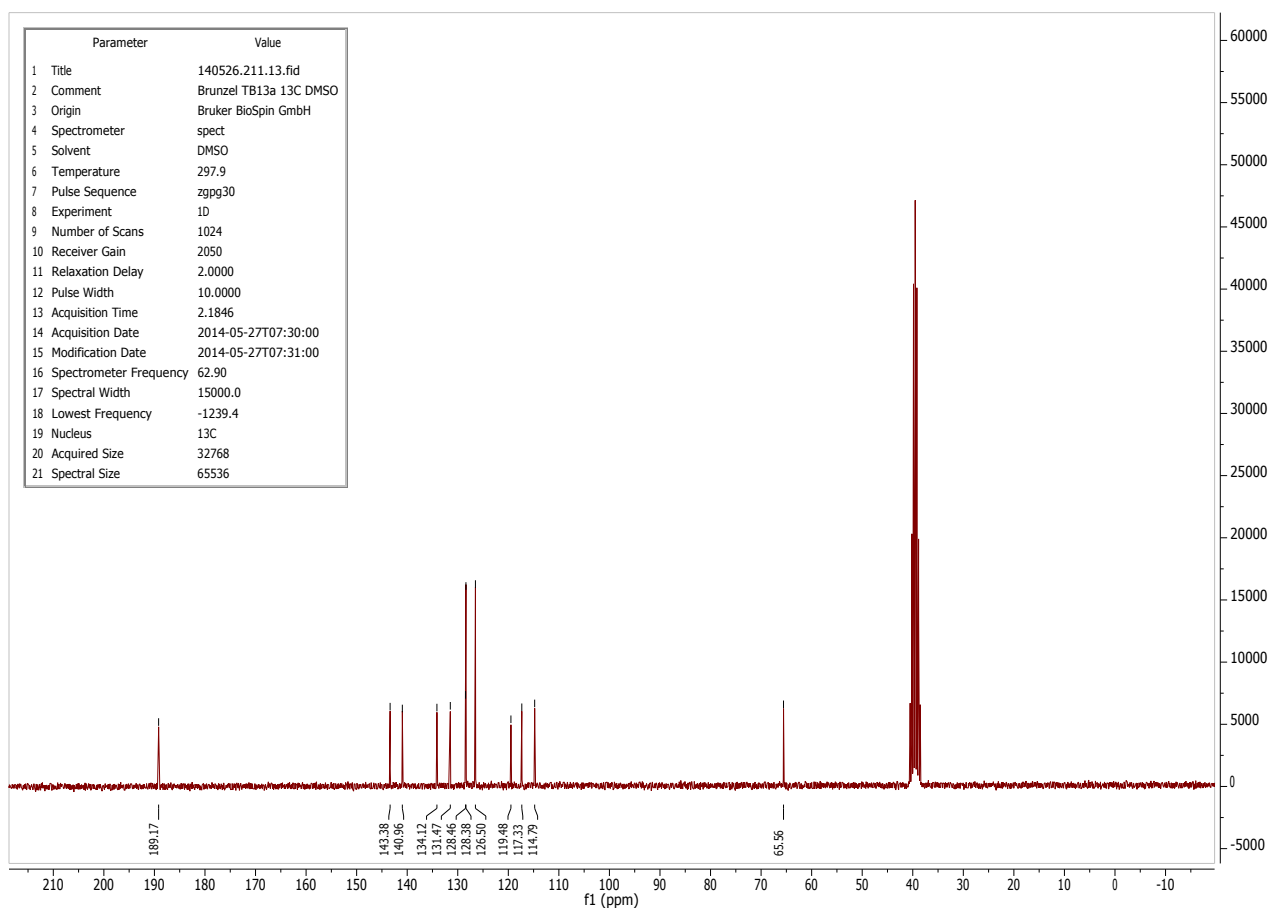

| Parameter                | Value (f2, f1)    |
|--------------------------|-------------------|
| 1 Title                  | 140526.211.11.ser |
| 2 Spectrometer           | spect             |
| 3 Solvent                | DMSO              |
| 4 Temperature            | 298.2             |
| 5 Experiment             | COSY              |
| 6 Spectrometer Frequency | (250.13, 250.13)  |
| 7 Spectral Width         | (2392.3, 2392.3)  |
| 8 Lowest Frequency       | (437.5, 437.5)    |
| 9 Nucleus                | (1H, 1H)          |
| 10 Acquired Size         | (1024, 128)       |
| 11 Spectral Size         | (1024, 1024)      |

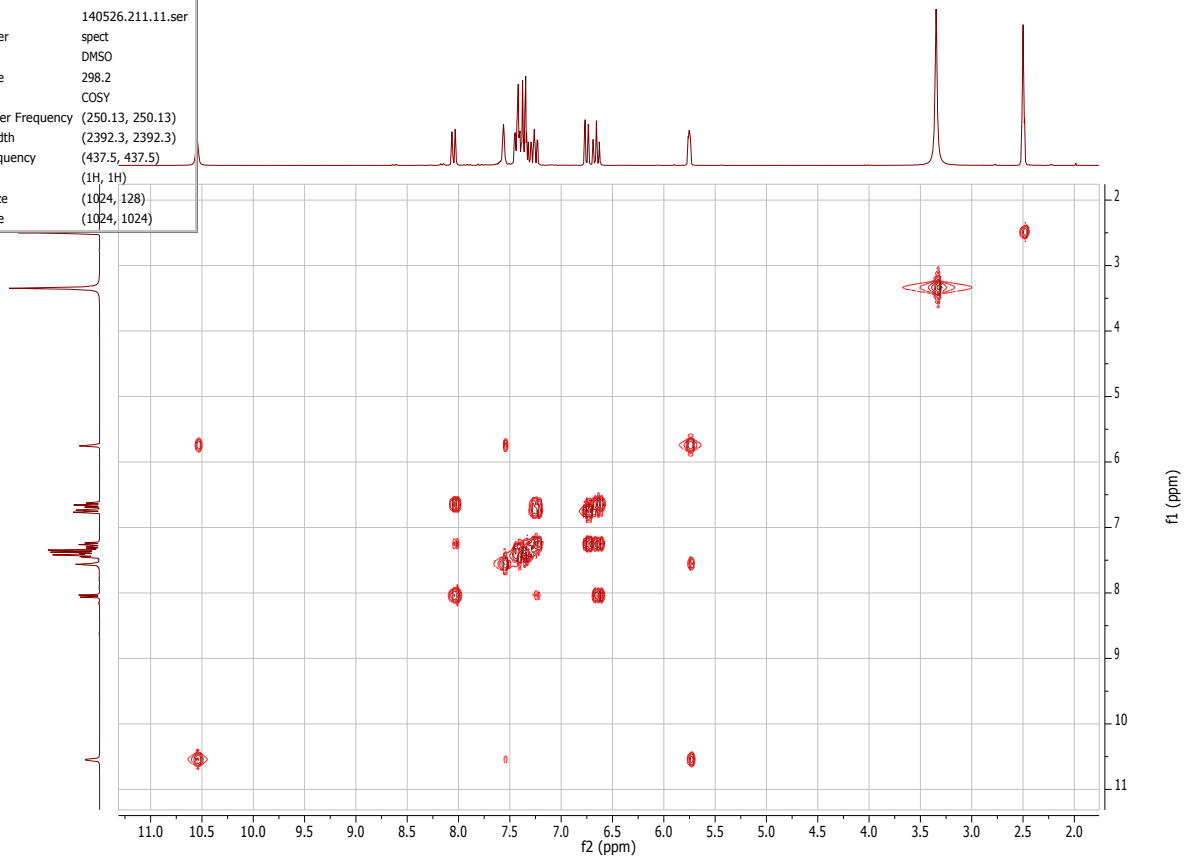

| Parameter                | Value (f2, f1)    |
|--------------------------|-------------------|
| 1 Title                  | 140526.211.12.ser |
| 2 Spectrometer           | spect             |
| 3 Solvent                | DMSO              |
| 4 Temperature            | 298.2             |
| 5 Experiment             | HSQC              |
| 6 Spectrometer Frequency | (62.90, 250.13)   |
| 7 Spectral Width         | (10416.7, 2392.3) |
| 8 Lowest Frequency       | (-493.0, 437.5)   |
| 9 Nucleus                | (13C, 1H)         |
| 10 Acquired Size         | (512, 256)        |
| 11 Spectral Size         | (512, 512)        |

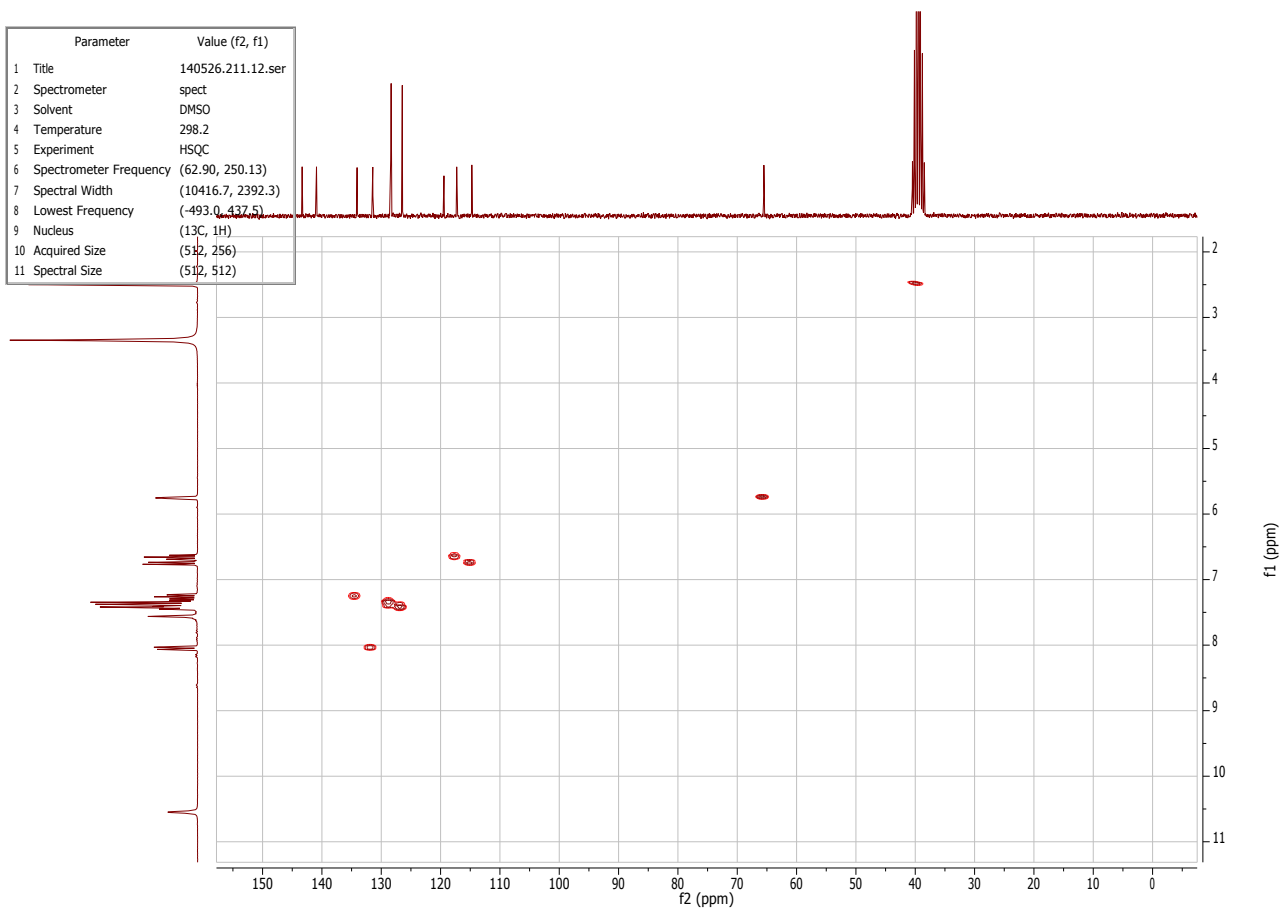

| Parameter                | Value (f2, f1)    |
|--------------------------|-------------------|
| 1 Title                  | 140528.223.11.ser |
| 2 Spectrometer           | spect             |
| 3 Solvent                | DMSO              |
| 4 Temperature            | 298.2             |
| 5 Experiment             | HMBC              |
| 6 Spectrometer Frequency | (62.90, 250.13)   |
| 7 Spectral Width         | (13966.5, 2415.5) |
| 8 Lowest Frequency       | (-704.2, 412.3)   |
| 9 Nucleus                | (13C, 1H)         |
| 10 Acquired Size         | (2048, 128)       |
| 11 Spectral Size         | (512, 2048)       |

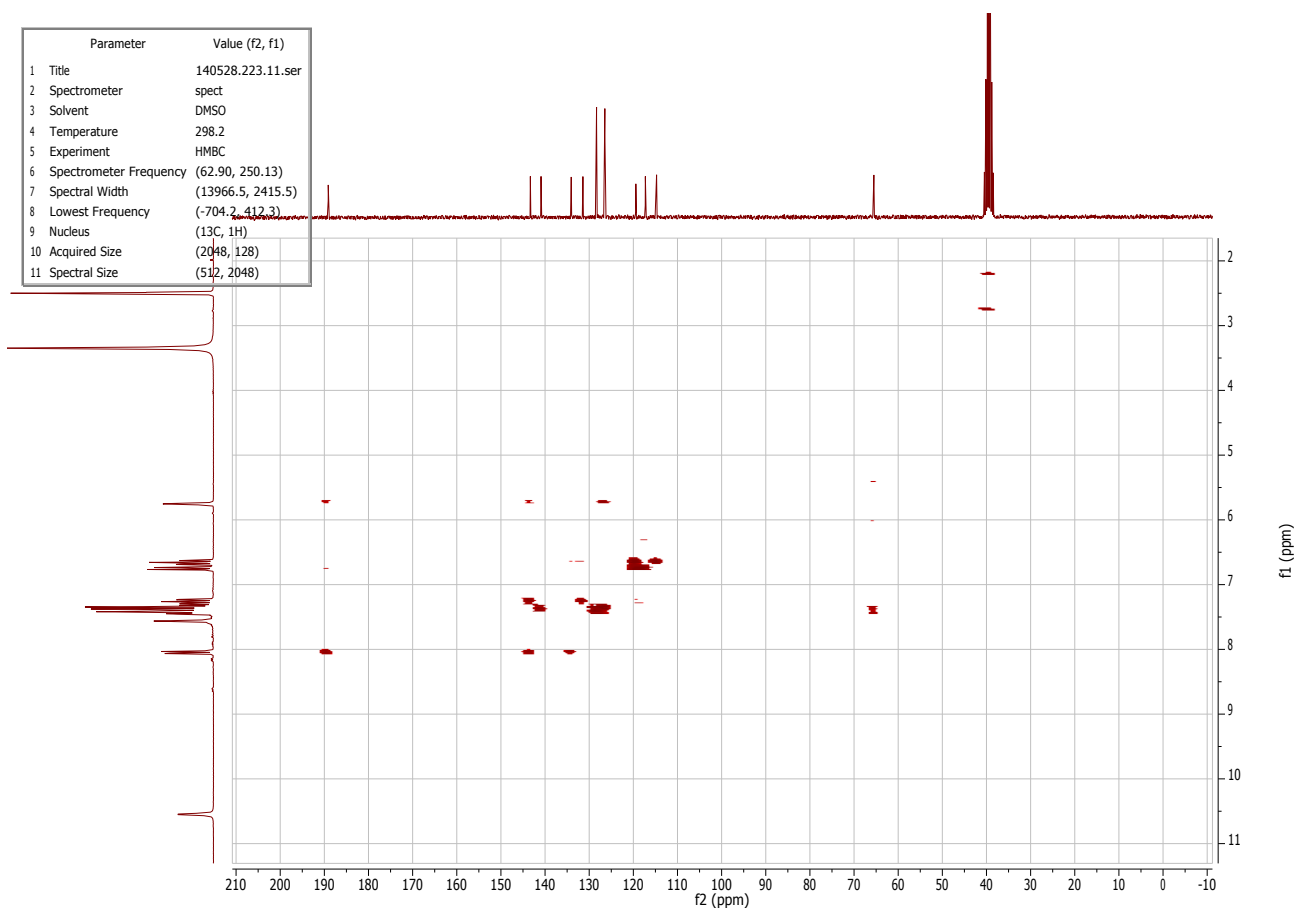

| Parameter                | Value (f2, f1)      |
|--------------------------|---------------------|
| 1 Title                  | 140528.223.12.1.2rr |
| 2 Spectrometer           | spect               |
| 3 Solvent                | DMSO                |
| 4 Temperature            | 298.2               |
| 5 Experiment             | NOESY               |
| 6 Spectrometer Frequency | (250.13, 250.13)    |
| 7 Spectral Width         | (2415.5, 2415.5)    |
| 8 Lowest Frequency       | (412.3, 412.3)      |
| 9 Nucleus                | (1H, 1H)            |
| 10 Acquired Size         | (1024, 256)         |
| 11 Spectral Size         | (1024, 1024)        |

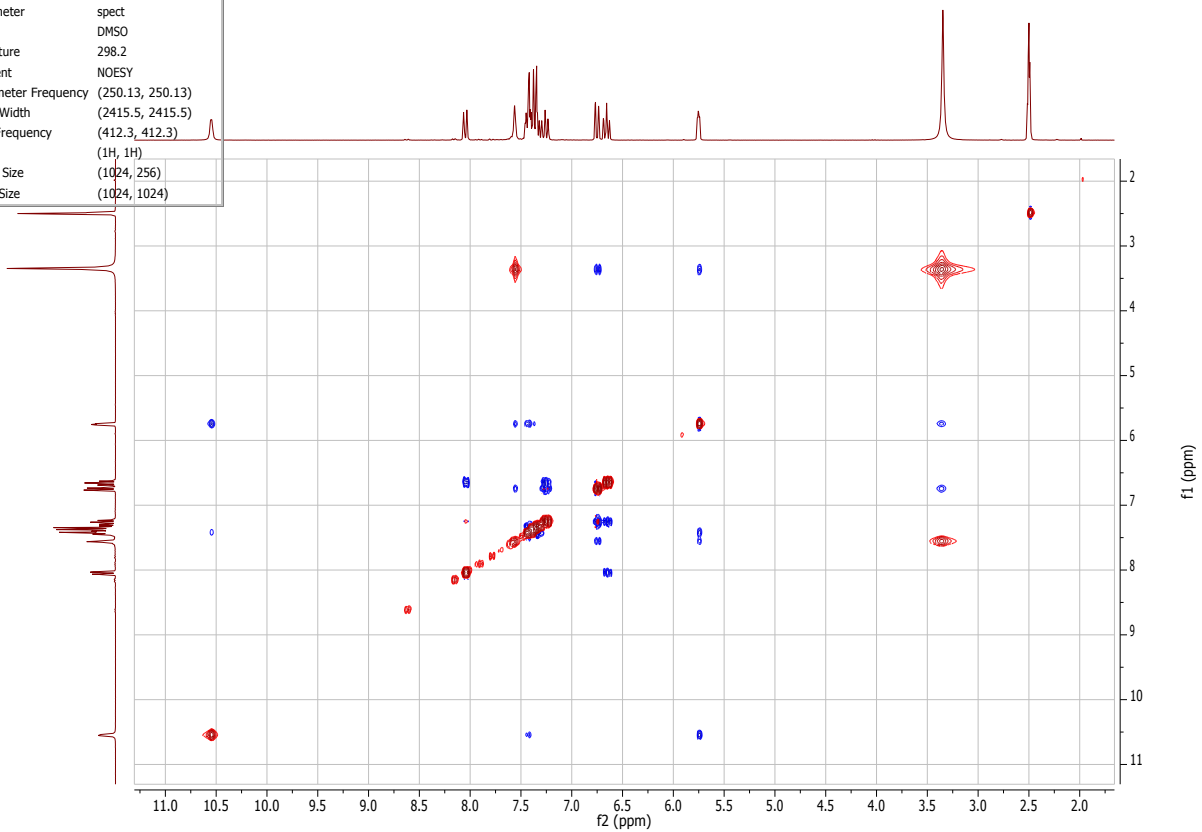

## 2-(4-Trifluoromethoxy)phenyl-2,3-dihydroquinazoline-4(1H)-thione (2b):

| Parameter                 | Value                                 |
|---------------------------|---------------------------------------|
| 1 Data File Name          | D:/ Tom NMR/ NMR/ 140610.201/ 10/ fid |
| 2 Title                   | 140610.201.10.fid                     |
| 3 Comment                 | Brunzel TB22 1H DMSO                  |
| 4 Origin                  | Bruker BioSpin GmbH                   |
| 5 Owner                   | nmr                                   |
| 6 Spectrometer            | spect                                 |
| 7 Author                  |                                       |
| 8 Solvent                 | DMSO                                  |
| 9 Temperature             | 298.2                                 |
| 10 Pulse Sequence         | zg30                                  |
| 11 Experiment             | 1D                                    |
| 12 Number of Scans        | 16                                    |
| 13 Spectrometer Frequency | 250.13                                |
| 14 Spectral Width         | 5165.3                                |
| 15 Lowest Frequency       | -1036.5                               |
| 16 Nucleus                | 1H                                    |
| 17 Acquired Size          | 32768                                 |
| 18 Spectral Size          | 65536                                 |

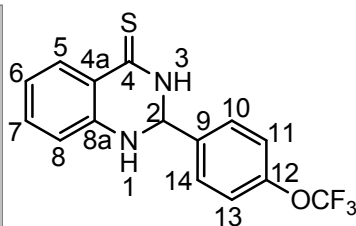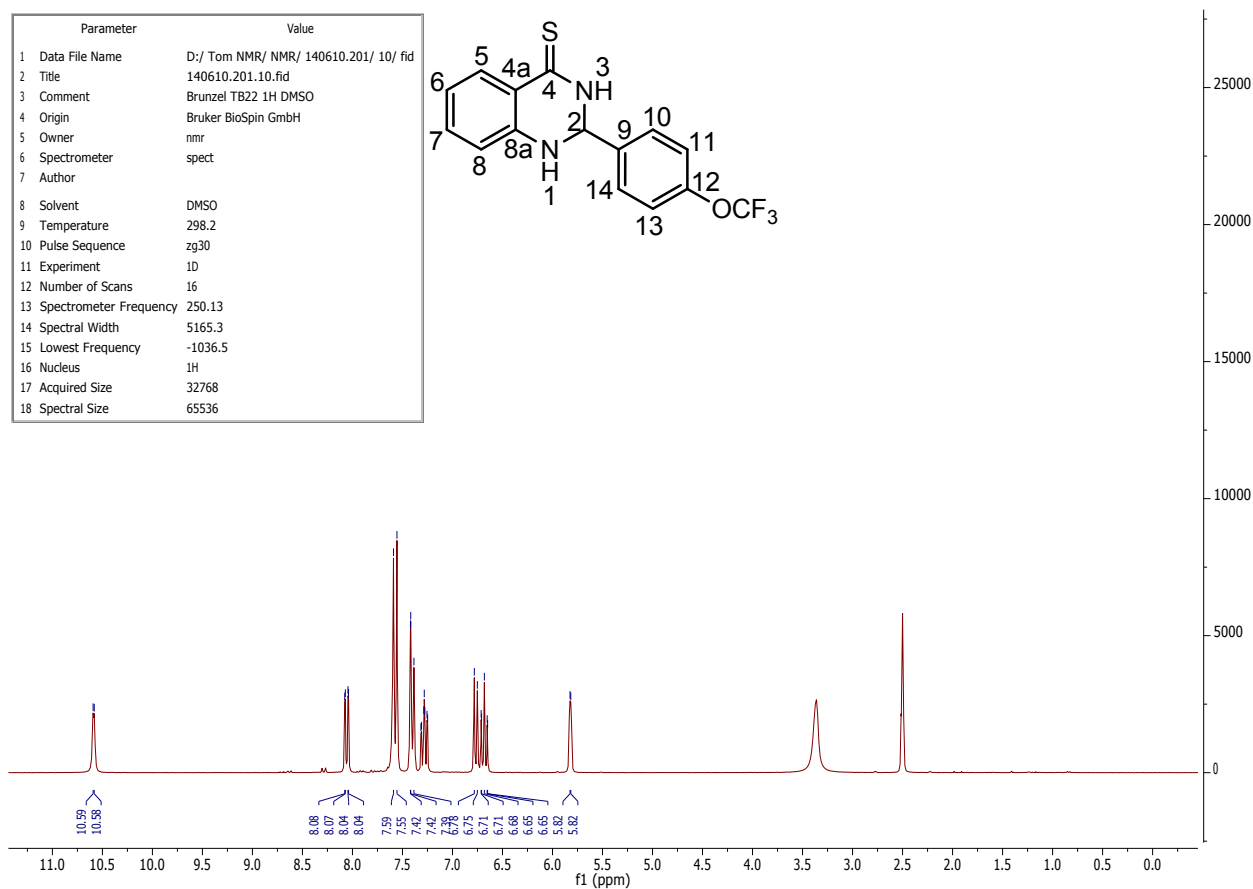

| Parameter                 | Value                                                     |
|---------------------------|-----------------------------------------------------------|
| 1 Data File Name          | C:/ Users/ Tom Brunzel/ Desktop/ NMR/ 140610.201/ 11/ fid |
| 2 Title                   | 140610.20                                                 |
| 3 Comment                 | Brunzel TB22 13C DMSO                                     |
| 4 Origin                  | Bruker BioSpin GmbH                                       |
| 5 Owner                   | nmr                                                       |
| 6 Site                    |                                                           |
| 7 Spectrometer            | spect                                                     |
| 8 Author                  |                                                           |
| 9 Solvent                 | DMSO                                                      |
| 10 Temperature            | 298.1                                                     |
| 11 Pulse Sequence         | zgpg30                                                    |
| 12 Number of Scans        | 512                                                       |
| 13 Receiver Gain          | 1620                                                      |
| 14 Relaxation Delay       | 2.0000                                                    |
| 15 Pulse Width            | 10.0000                                                   |
| 16 Acquisition Time       | 2.1846                                                    |
| 17 Acquisition Date       | 2014-06-10T12:34:00                                       |
| 18 Modification Date      | 2014-06-10T11:35:04                                       |
| 19 Spectrometer Frequency | 62.90                                                     |
| 20 Spectral Width         | 15000.0                                                   |
| 21 Lowest Frequency       | -1239.1                                                   |
| 22 Nucleus                | 13C                                                       |
| 23 Acquired Size          | 32768                                                     |
| 24 Spectral Size          | 65536                                                     |

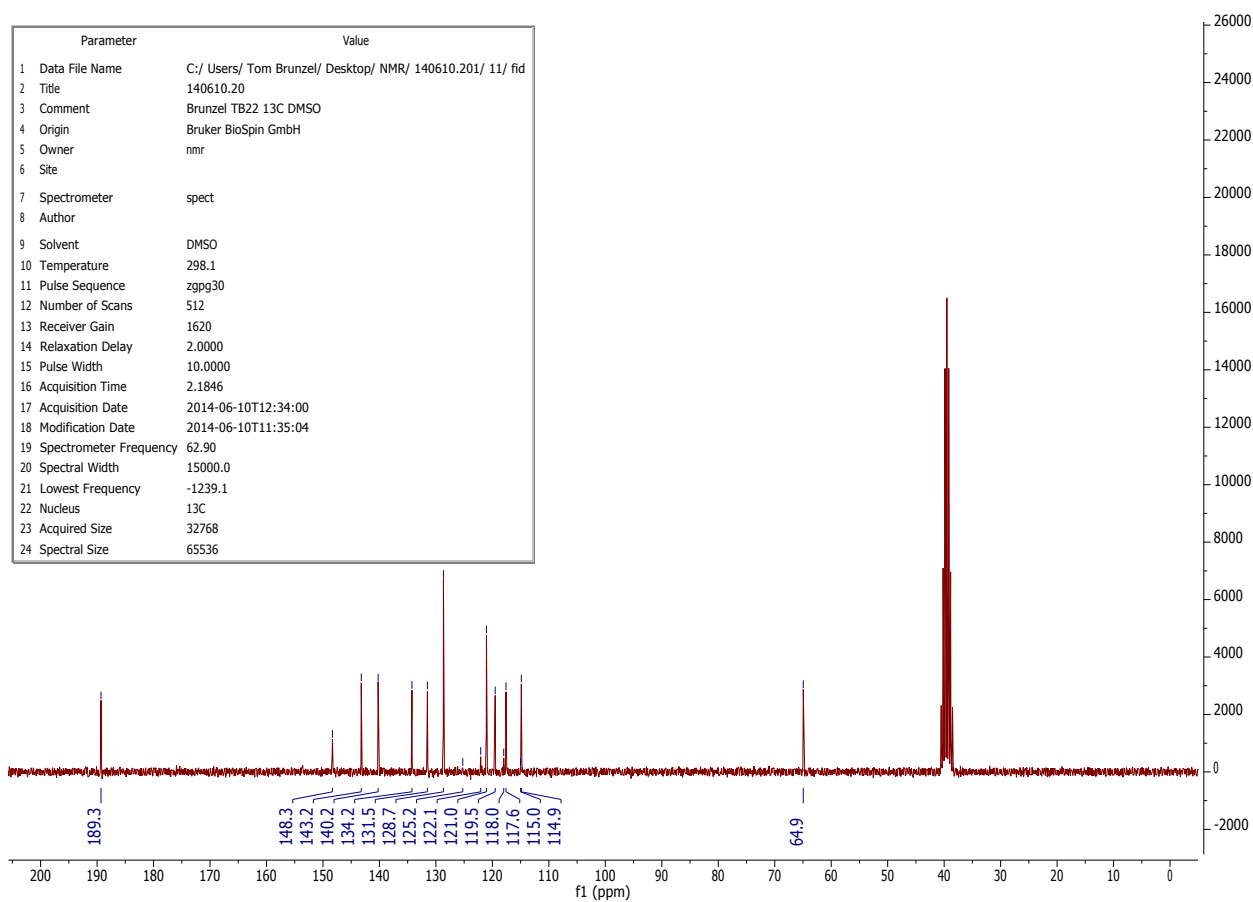

| Parameter                 | Value                                               |
|---------------------------|-----------------------------------------------------|
| 1 Data File Name          | L:/ NMR300/ data/ 1408/ nmr/ 140821.343/ 10/ fid    |
| 2 Title                   | 140821.343.10.fid                                   |
| 3 Comment                 | Oschatz/ TB-22<br>Au19F DMSO / opt/ topspin 1408 43 |
| 4 Origin                  | Bruker BioSpin GmbH                                 |
| 5 Owner                   | labor                                               |
| 6 Spectrometer            | AV300                                               |
| 7 Author                  |                                                     |
| 8 Solvent                 | DMSO                                                |
| 9 Temperature             | 294.5                                               |
| 10 Pulse Sequence         | zgfgq                                               |
| 11 Experiment             | 1D                                                  |
| 12 Number of Scans        | 128                                                 |
| 13 Spectrometer Frequency | 282.38                                              |
| 14 Spectral Width         | 100000.0                                            |
| 15 Lowest Frequency       | -71248.1                                            |
| 16 Nucleus                | 19F                                                 |
| 17 Acquired Size          | 32768                                               |
| 18 Spectral Size          | 65536                                               |

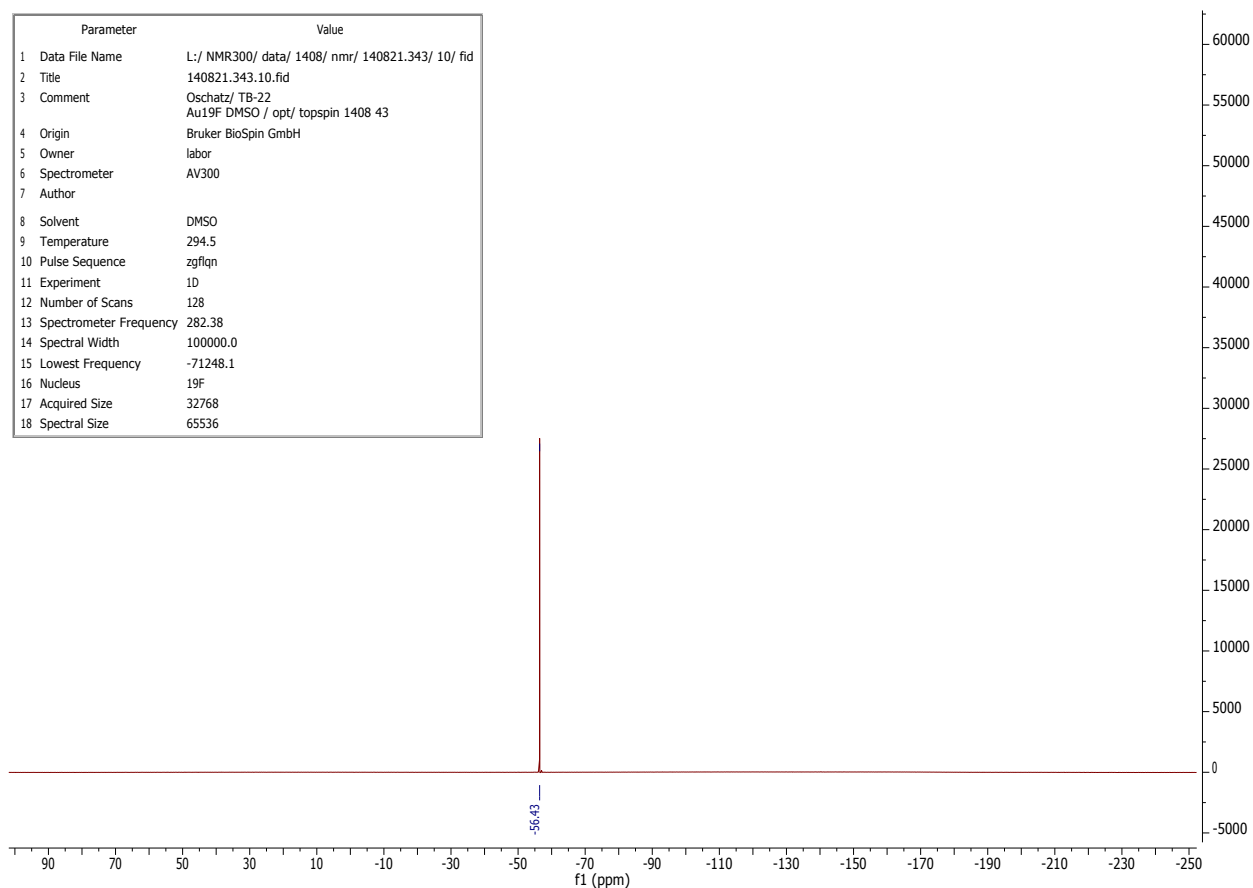

## 2-(4-Fluorophenyl)-2,3-dihydroquinazoline-4(1H)-thione (2c):

| Parameter                 | Value                                                     |
|---------------------------|-----------------------------------------------------------|
| 1 Data File Name          | C:/ Users/ Tom Brunzel/ Desktop/ NMR/ 140610.202/ 10/ fid |
| 2 Title                   | 140610.20                                                 |
| 3 Comment                 | Brunzel TB23 1H DMSO                                      |
| 4 Origin                  | Bruker BioSpin GmbH                                       |
| 5 Owner                   | nmr                                                       |
| 6 Site                    |                                                           |
| 7 Spectrometer            | spect                                                     |
| 8 Author                  |                                                           |
| 9 Solvent                 | DMSO                                                      |
| 10 Temperature            | 298.2                                                     |
| 11 Pulse Sequence         | zg30                                                      |
| 12 Number of Scans        | 16                                                        |
| 13 Receiver Gain          | 228                                                       |
| 14 Relaxation Delay       | 1.0000                                                    |
| 15 Pulse Width            | 10.0000                                                   |
| 16 Acquisition Time       | 6.3439                                                    |
| 17 Acquisition Date       | 2014-06-10T13:02:00                                       |
| 18 Modification Date      | 2014-06-10T12:02:44                                       |
| 19 Spectrometer Frequency | 250.13                                                    |
| 20 Spectral Width         | 5165.3                                                    |
| 21 Lowest Frequency       | -1036.5                                                   |
| 22 Nucleus                | 1H                                                        |
| 23 Acquired Size          | 32768                                                     |
| 24 Spectral Size          | 65536                                                     |

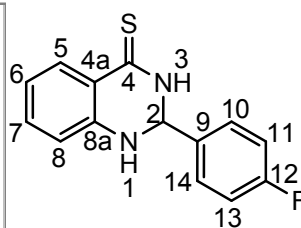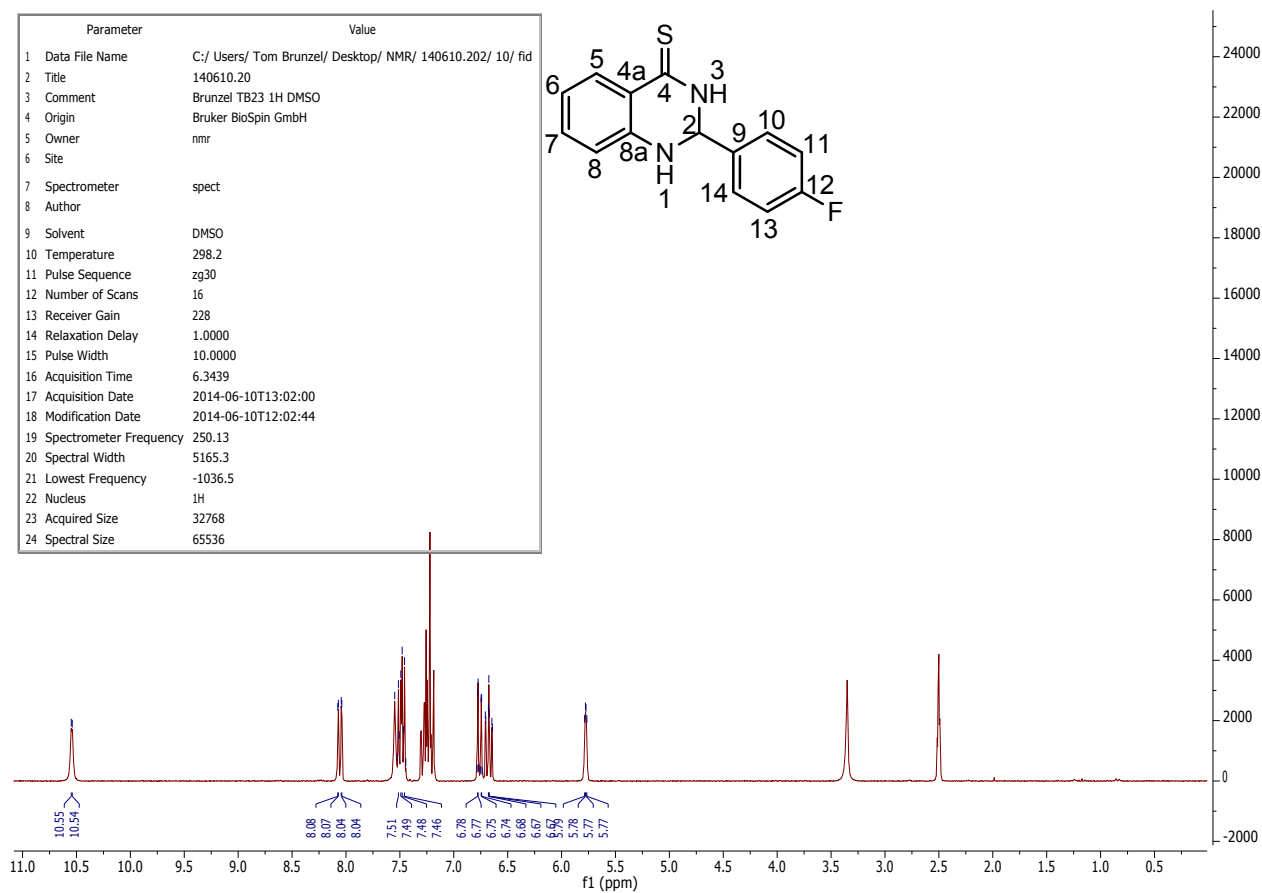

| Parameter                 | Value                                              |
|---------------------------|----------------------------------------------------|
| 1 Data File Name          | C:/Users/Tom Brunzel/Desktop/NMR/140610.202/11/fid |
| 2 Title                   | 140610.20                                          |
| 3 Comment                 | Brunzel TB23 13C DMSO                              |
| 4 Origin                  | Bruker BioSpin GmbH                                |
| 5 Owner                   | nmr                                                |
| 6 Site                    |                                                    |
| 7 Spectrometer            | spect                                              |
| 8 Author                  |                                                    |
| 9 Solvent                 | DMSO                                               |
| 10 Temperature            | 298.1                                              |
| 11 Pulse Sequence         | zgpg30                                             |
| 12 Number of Scans        | 512                                                |
| 13 Receiver Gain          | 2050                                               |
| 14 Relaxation Delay       | 2.0000                                             |
| 15 Pulse Width            | 10.0000                                            |
| 16 Acquisition Time       | 2.1846                                             |
| 17 Acquisition Date       | 2014-06-10T13:40:00                                |
| 18 Modification Date      | 2014-06-10T12:40:54                                |
| 19 Spectrometer Frequency | 62.90                                              |
| 20 Spectral Width         | 15000.0                                            |
| 21 Lowest Frequency       | -1239.6                                            |
| 22 Nucleus                | 13C                                                |
| 23 Acquired Size          | 32768                                              |
| 24 Spectral Size          | 65536                                              |

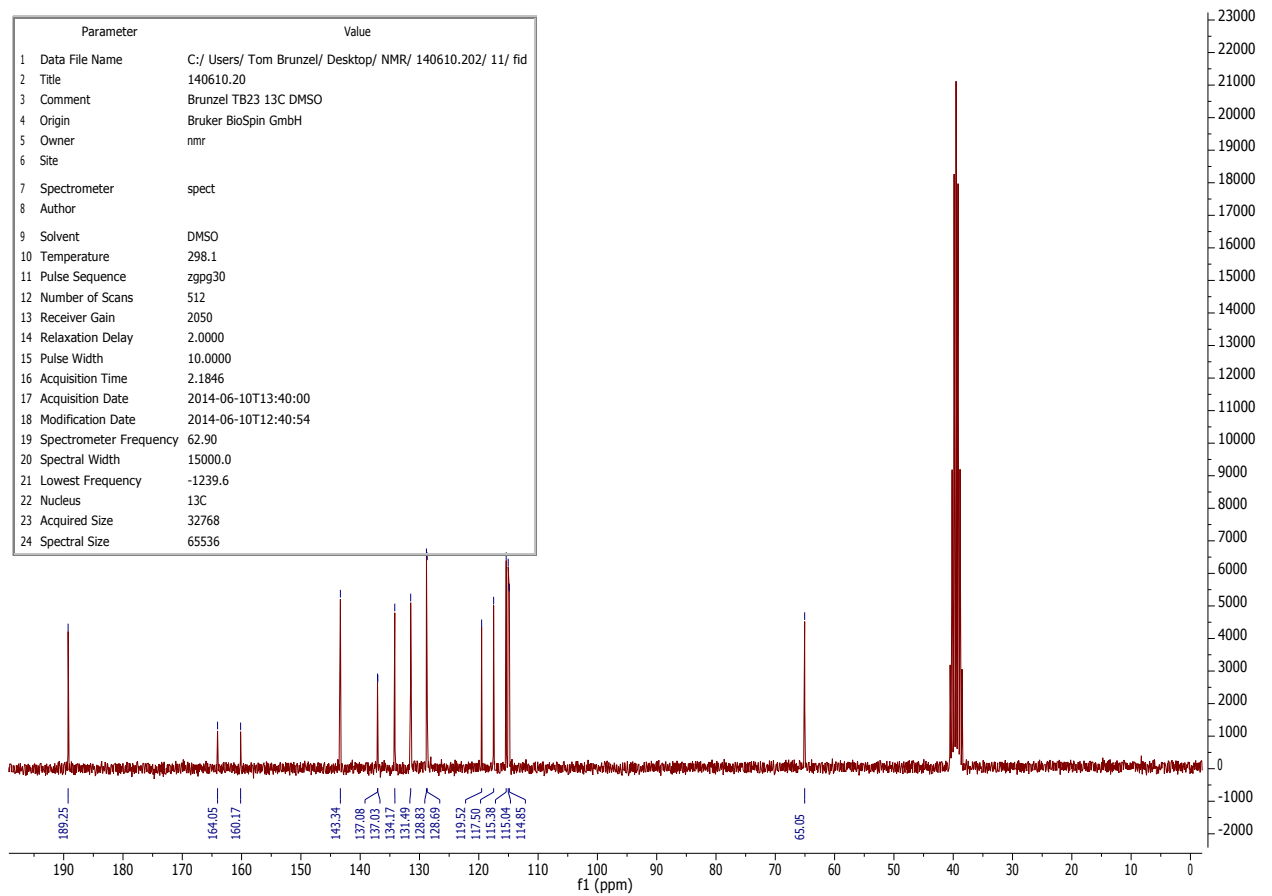

| Parameter                 | Value                                               |
|---------------------------|-----------------------------------------------------|
| 1 Data File Name          | L:/NMR300/data/1408/nmr/140821.344/10/fid           |
| 2 Title                   | 140821.344.10.fid                                   |
| 3 Comment                 | Oschatz/ TB-23<br>Au19F DMSO / opt/ topspin 1408 44 |
| 4 Origin                  | Bruker BioSpin GmbH                                 |
| 5 Owner                   | labor                                               |
| 6 Spectrometer            | AV300                                               |
| 7 Author                  |                                                     |
| 8 Solvent                 | DMSO                                                |
| 9 Temperature             | 294.5                                               |
| 10 Pulse Sequence         | zgfgq                                               |
| 11 Experiment             | 1D                                                  |
| 12 Number of Scans        | 128                                                 |
| 13 Spectrometer Frequency | 282.38                                              |
| 14 Spectral Width         | 100000.0                                            |
| 15 Lowest Frequency       | -71248.1                                            |
| 16 Nucleus                | 19F                                                 |
| 17 Acquired Size          | 32768                                               |
| 18 Spectral Size          | 65536                                               |

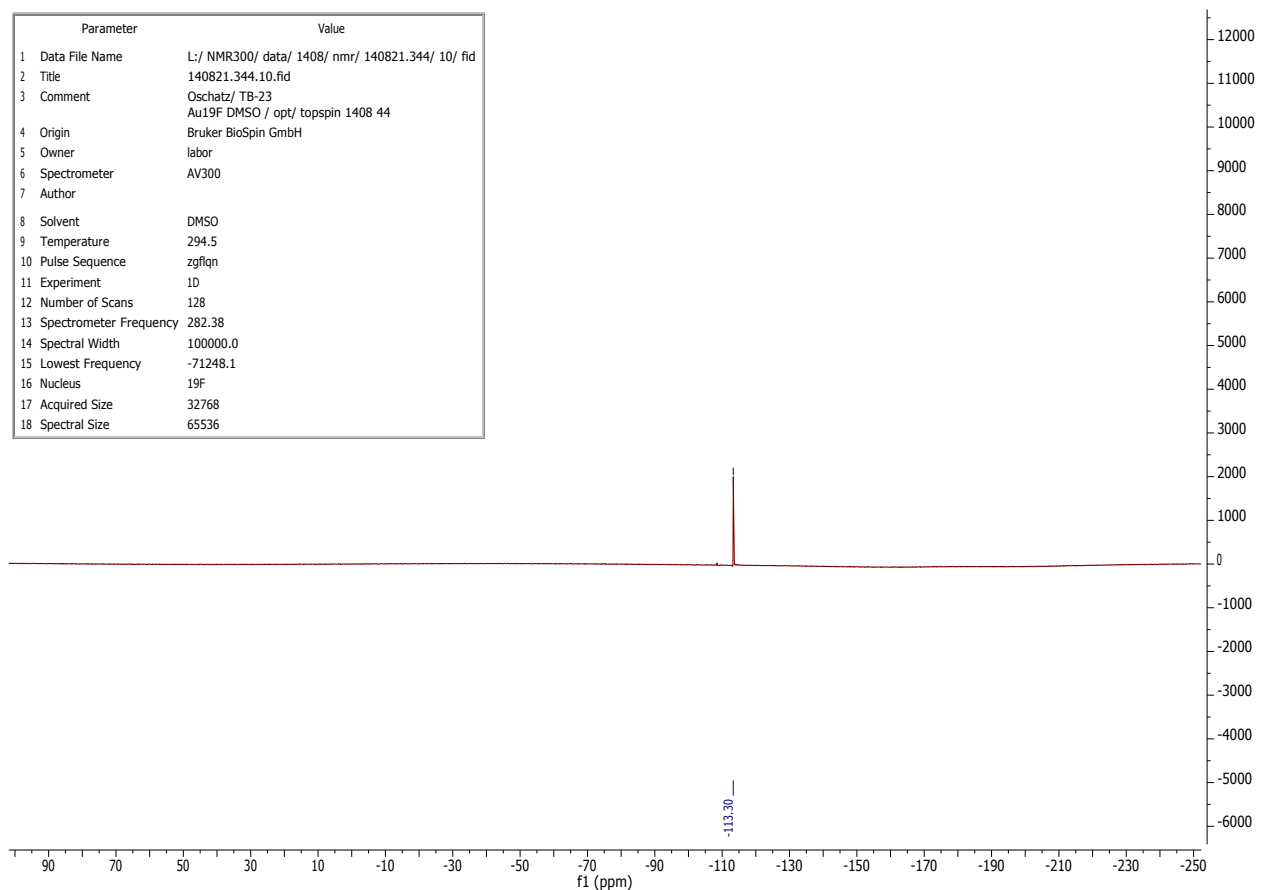

## 2-(4-Cyanophenyl)-2,3-dihydroquinazoline-4(1H)-thione (2d):

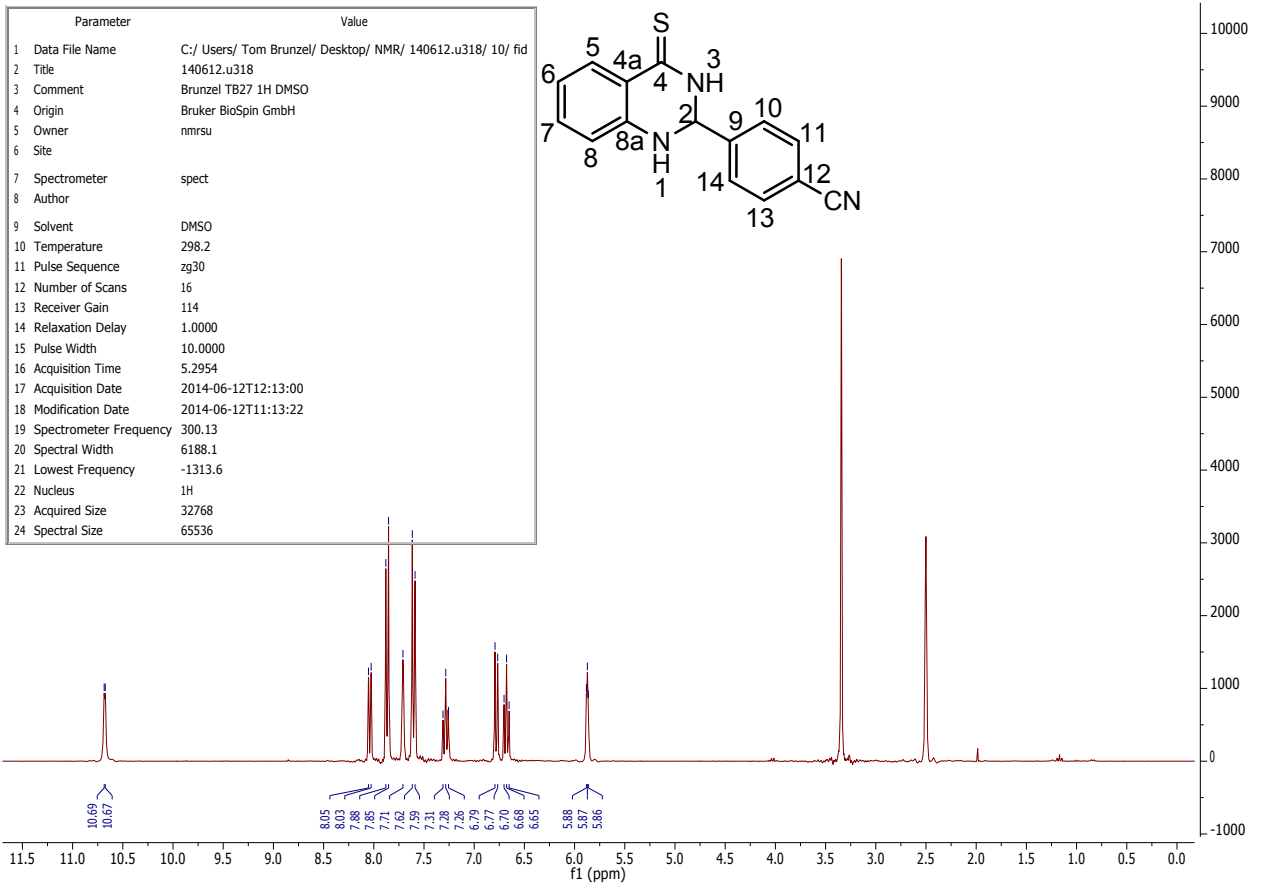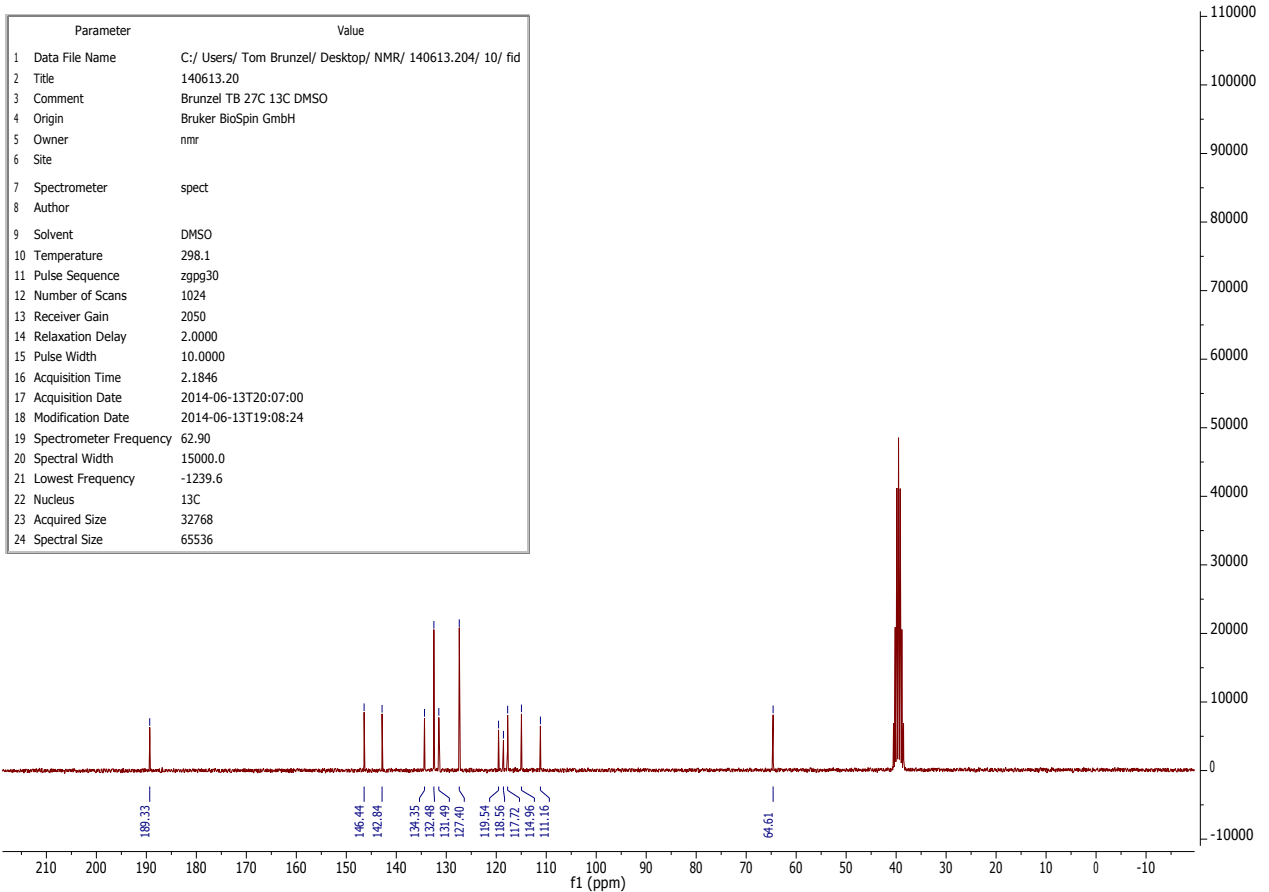



## 2-(3-Methylphenyl)-2,3-dihydroquinazoline-4(1H)-thione (2e):

| Parameter                 | Value                                               |
|---------------------------|-----------------------------------------------------|
| 1 Data File Name          | C:/Users/Tom Brunzel/Desktop/NMR/140612.u321/10/fid |
| 2 Title                   | 140612.u321                                         |
| 3 Comment                 | Brunzel TB31 1H DMSO                                |
| 4 Origin                  | Bruker BioSpin GmbH                                 |
| 5 Owner                   | nmsru                                               |
| 6 Site                    |                                                     |
| 7 Spectrometer            | spect                                               |
| 8 Author                  |                                                     |
| 9 Solvent                 | DMSO                                                |
| 10 Temperature            | 298.2                                               |
| 11 Pulse Sequence         | zg30                                                |
| 12 Number of Scans        | 16                                                  |
| 13 Receiver Gain          | 101                                                 |
| 14 Relaxation Delay       | 1.0000                                              |
| 15 Pulse Width            | 10.0000                                             |
| 16 Acquisition Time       | 5.2954                                              |
| 17 Acquisition Date       | 2014-06-12T12:27:00                                 |
| 18 Modification Date      | 2014-06-12T11:27:50                                 |
| 19 Spectrometer Frequency | 300.13                                              |
| 20 Spectral Width         | 6188.1                                              |
| 21 Lowest Frequency       | -1277.3                                             |
| 22 Nucleus                | 1H                                                  |
| 23 Acquired Size          | 32768                                               |
| 24 Spectral Size          | 65536                                               |

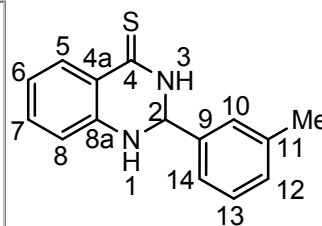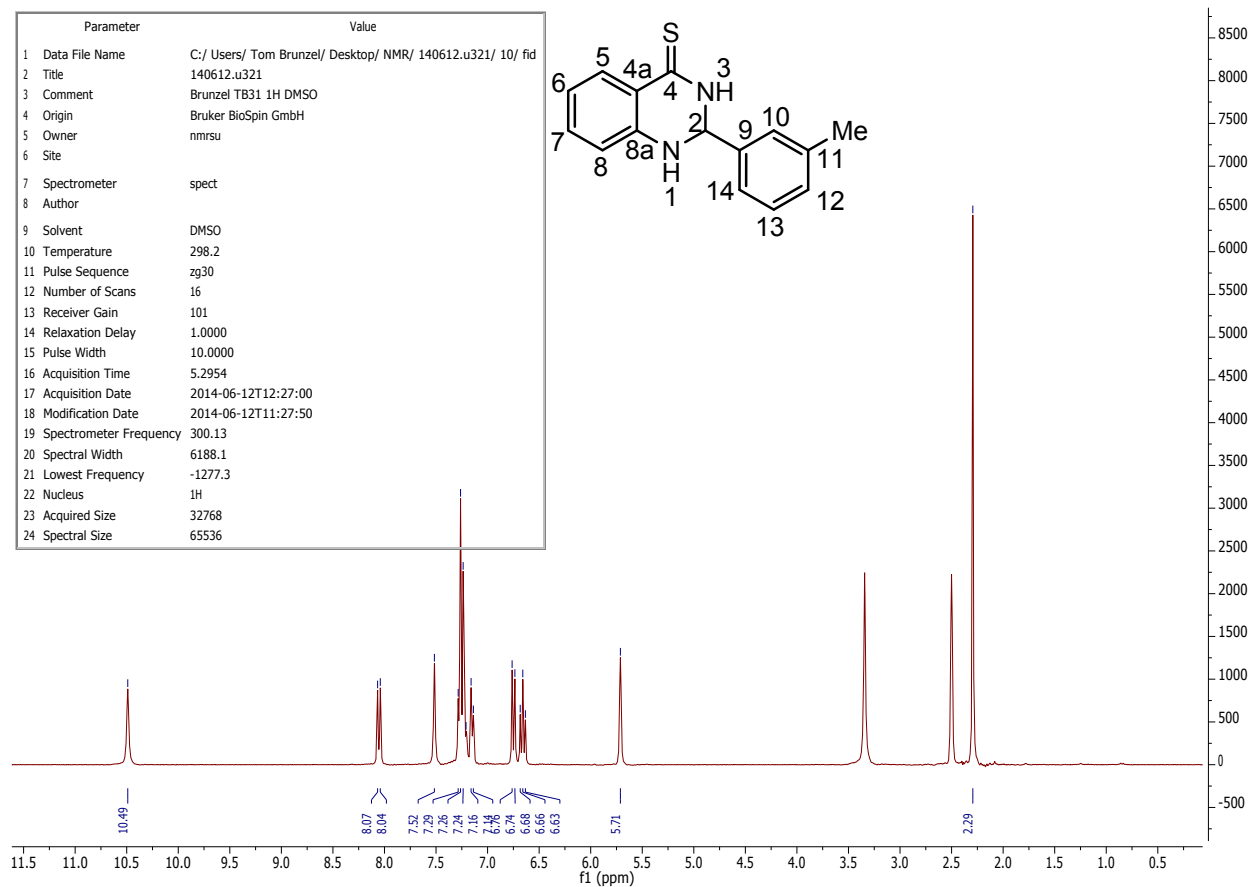

| Parameter                 | Value                                              |
|---------------------------|----------------------------------------------------|
| 1 Data File Name          | C:/Users/Tom Brunzel/Desktop/NMR/140613.207/10/fid |
| 2 Title                   | 140613.21                                          |
| 3 Comment                 | Brunzel TB 31C 13C DMSO                            |
| 4 Origin                  | Bruker BioSpin GmbH                                |
| 5 Owner                   | nmr                                                |
| 6 Site                    |                                                    |
| 7 Spectrometer            | spect                                              |
| 8 Author                  |                                                    |
| 9 Solvent                 | DMSO                                               |
| 10 Temperature            | 297.9                                              |
| 11 Pulse Sequence         | zpgg30                                             |
| 12 Number of Scans        | 1024                                               |
| 13 Receiver Gain          | 2050                                               |
| 14 Relaxation Delay       | 2.0000                                             |
| 15 Pulse Width            | 10.0000                                            |
| 16 Acquisition Time       | 2.1846                                             |
| 17 Acquisition Date       | 2014-06-14T01:11:00                                |
| 18 Modification Date      | 2014-06-14T00:11:44                                |
| 19 Spectrometer Frequency | 62.90                                              |
| 20 Spectral Width         | 15000.0                                            |
| 21 Lowest Frequency       | -1239.7                                            |
| 22 Nucleus                | 13C                                                |
| 23 Acquired Size          | 32768                                              |
| 24 Spectral Size          | 65536                                              |

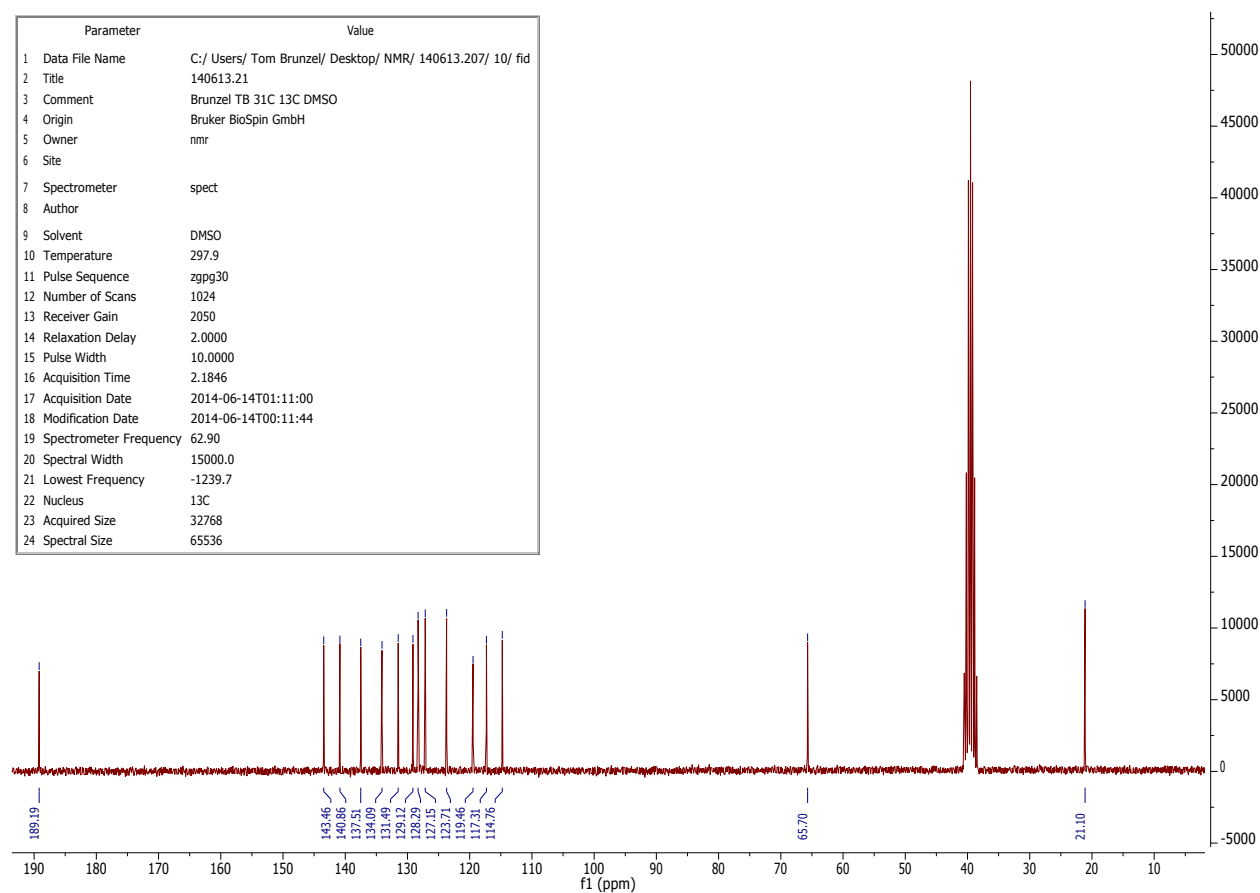

## 2-(4-Methylphenyl)-2,3-dihydroquinazoline-4(1H)-thione (2f):

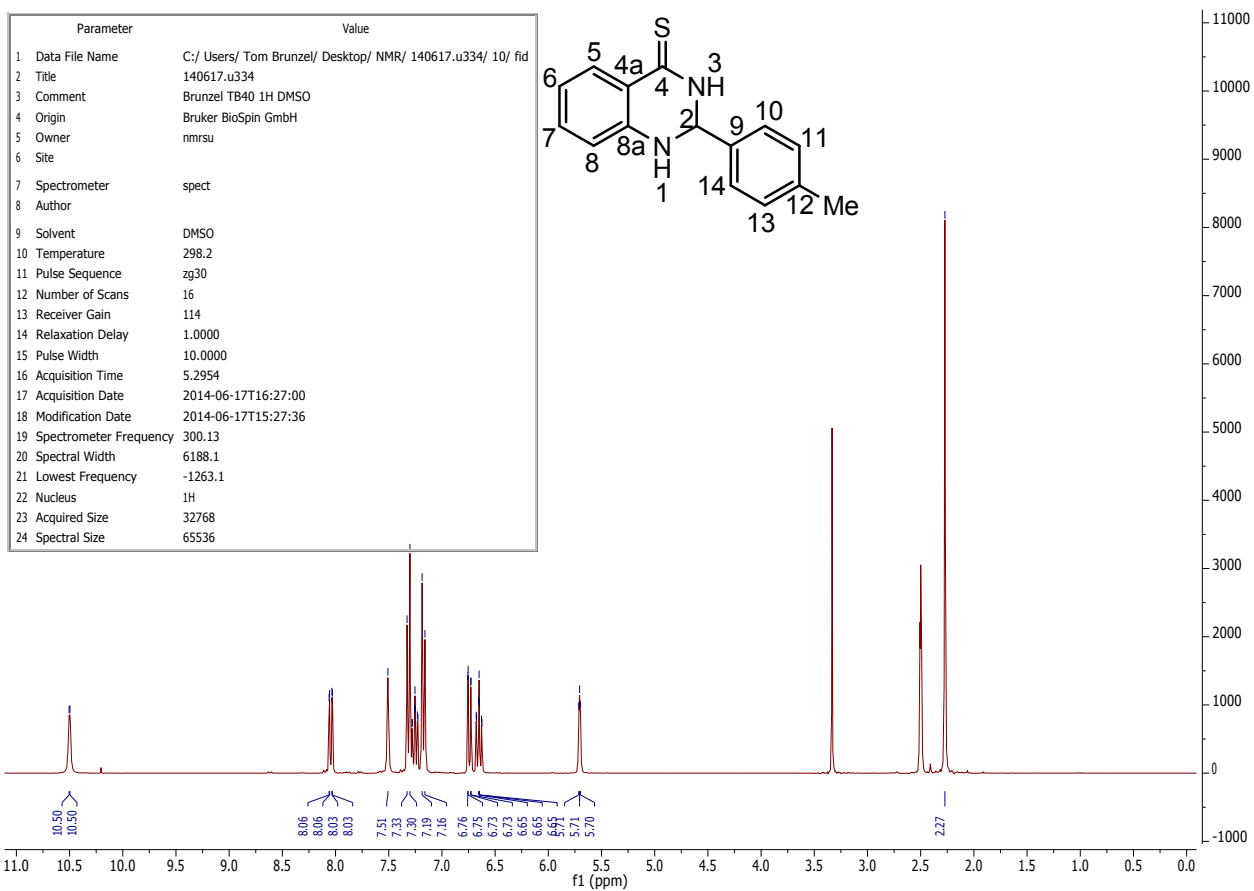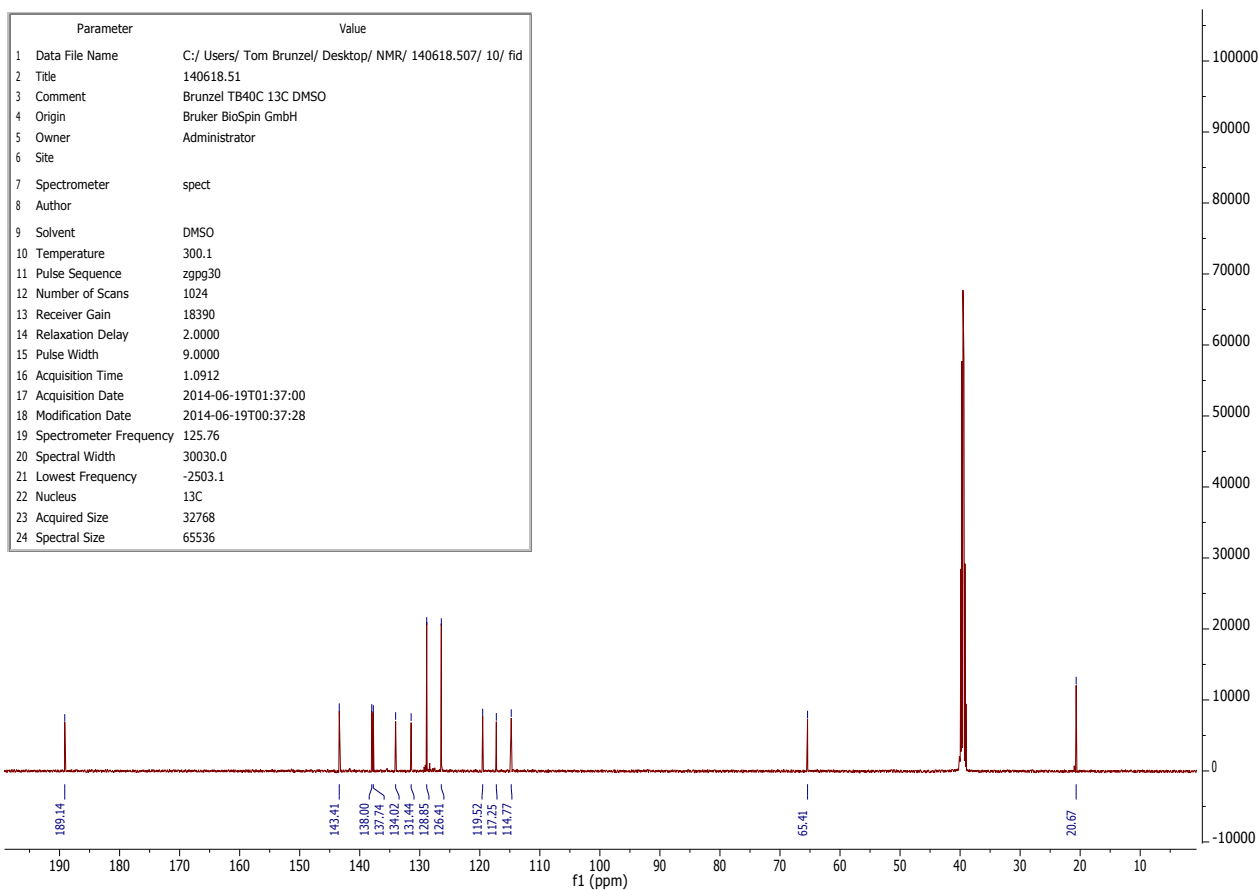

**(E)-2-(1-Phenylprop-1-en-2-yl)-2,3-dihydroquinazoline-4(1H)-thione (2g):**

| Parameter                 | Value                                                |
|---------------------------|------------------------------------------------------|
| 1 Data File Name          | C:/Users/Tom Brunzel/Desktop/NMR/140612.u317/10/ fid |
| 2 Title                   | 140612.u317                                          |
| 3 Comment                 | Brunzel TB25 1H DMSO                                 |
| 4 Origin                  | Bruker BioSpin GmbH                                  |
| 5 Owner                   | nmrsu                                                |
| 6 Site                    |                                                      |
| 7 Spectrometer            | spect                                                |
| 8 Author                  |                                                      |
| 9 Solvent                 | DMSO                                                 |
| 10 Temperature            | 298.2                                                |
| 11 Pulse Sequence         | zg30                                                 |
| 12 Number of Scans        | 16                                                   |
| 13 Receiver Gain          | 101                                                  |
| 14 Relaxation Delay       | 1.0000                                               |
| 15 Pulse Width            | 10.0000                                              |
| 16 Acquisition Time       | 5.2954                                               |
| 17 Acquisition Date       | 2014-06-12T12:08:00                                  |
| 18 Modification Date      | 2014-06-12T11:08:16                                  |
| 19 Spectrometer Frequency | 300.13                                               |
| 20 Spectral Width         | 6188.1                                               |
| 21 Lowest Frequency       | -1268.8                                              |
| 22 Nucleus                | 1H                                                   |
| 23 Acquired Size          | 32768                                                |
| 24 Spectral Size          | 65536                                                |

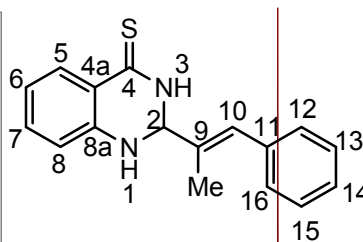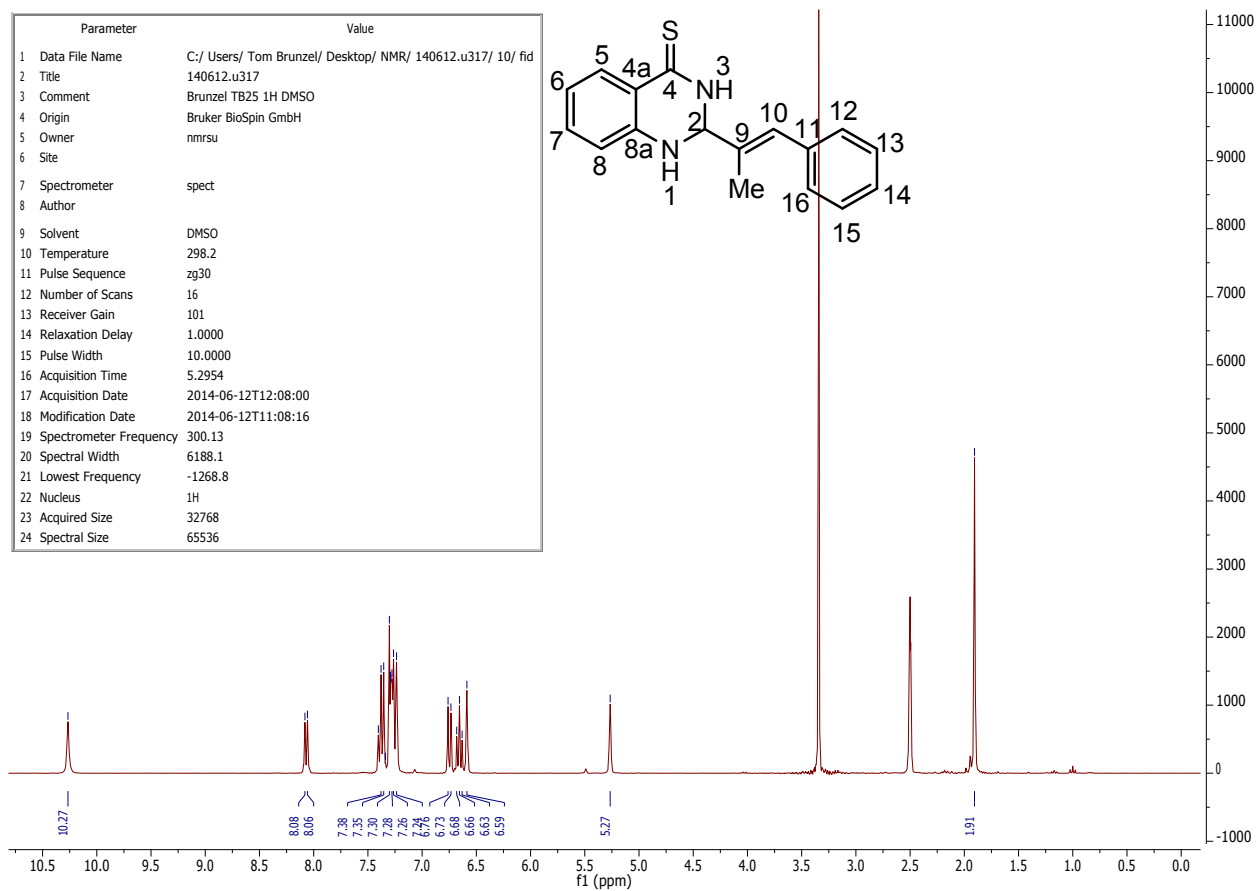

| Parameter                 | Value                                               |
|---------------------------|-----------------------------------------------------|
| 1 Data File Name          | C:/Users/Tom Brunzel/Desktop/NMR/140613.203/10/ fid |
| 2 Title                   | 140613.20                                           |
| 3 Comment                 | Brunzel TB 25C 13C DMSO                             |
| 4 Origin                  | Bruker BioSpin GmbH                                 |
| 5 Owner                   | nmr                                                 |
| 6 Site                    |                                                     |
| 7 Spectrometer            | spect                                               |
| 8 Author                  |                                                     |
| 9 Solvent                 | DMSO                                                |
| 10 Temperature            | 298.3                                               |
| 11 Pulse Sequence         | zgpg30                                              |
| 12 Number of Scans        | 1024                                                |
| 13 Receiver Gain          | 2050                                                |
| 14 Relaxation Delay       | 2.0000                                              |
| 15 Pulse Width            | 10.0000                                             |
| 16 Acquisition Time       | 2.1846                                              |
| 17 Acquisition Date       | 2014-06-13T18:27:00                                 |
| 18 Modification Date      | 2014-06-13T17:28:16                                 |
| 19 Spectrometer Frequency | 62.90                                               |
| 20 Spectral Width         | 15000.0                                             |
| 21 Lowest Frequency       | -1239.6                                             |
| 22 Nucleus                | 13C                                                 |
| 23 Acquired Size          | 32768                                               |
| 24 Spectral Size          | 65536                                               |

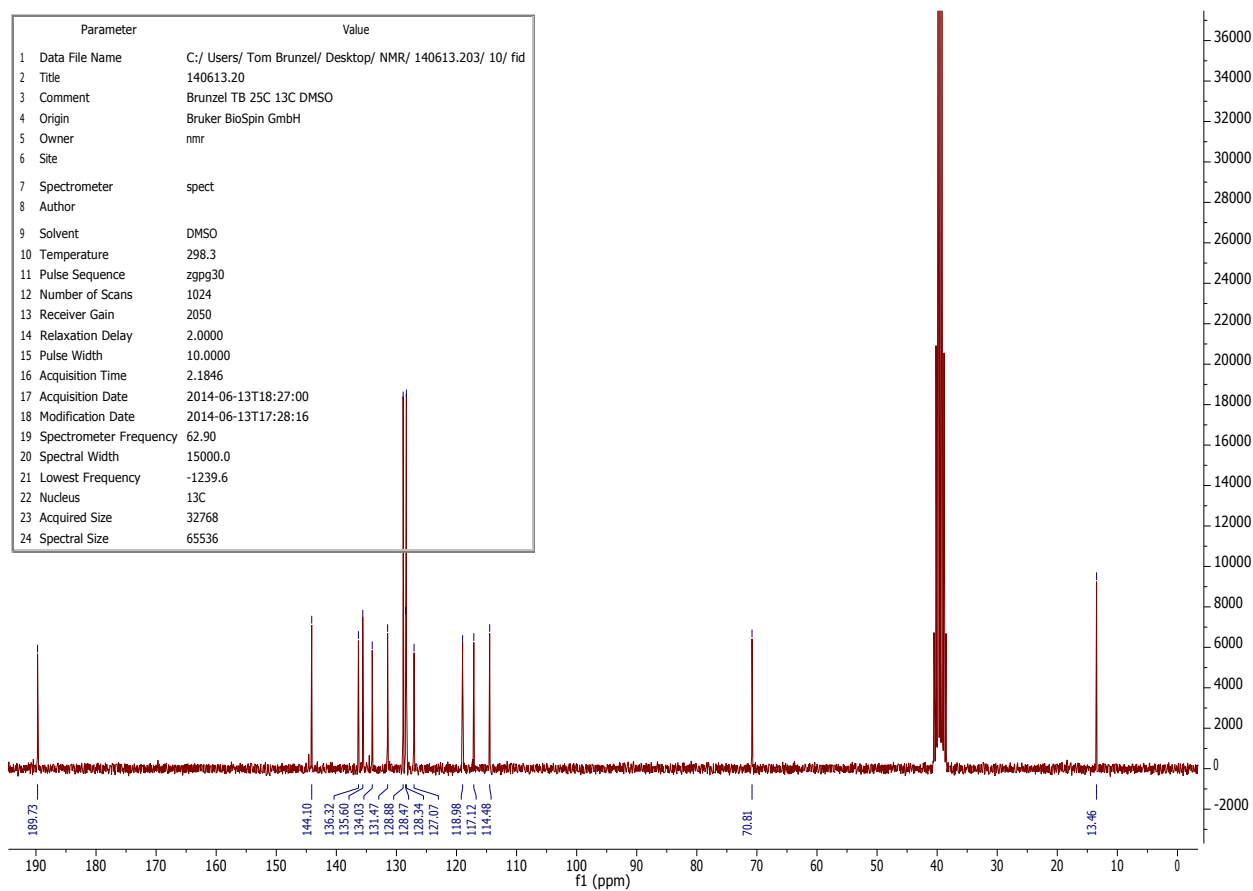

## 2-(4-Hydroxyphenyl)-2,3-dihydroquinazoline-4(1H)-thione (2h):

| Parameter                 | Value                                                          |
|---------------------------|----------------------------------------------------------------|
| 1 Data File Name          | K:\ nmr\ Fourier300\ data\ 1407\ nmr\ 140725.f318\ 10\ fid     |
| 2 Title                   | 140725.f318.10.fid                                             |
| 3 Comment                 | Oschatz, SO-330<br>PROTON DMSO (C:\ Bruker\ TopSpin3.2) 1407 2 |
| 4 Origin                  | Bruker BioSpin GmbH                                            |
| 5 Owner                   | nmr                                                            |
| 6 Spectrometer            | FOURIER300                                                     |
| 7 Author                  |                                                                |
| 8 Solvent                 | DMSO                                                           |
| 9 Temperature             | 300.1                                                          |
| 10 Pulse Sequence         | zg30                                                           |
| 11 Experiment             | 1D                                                             |
| 12 Number of Scans        | 16                                                             |
| 13 Spectrometer Frequency | 300.20                                                         |
| 14 Spectral Width         | 6103.5                                                         |
| 15 Lowest Frequency       | -1197.6                                                        |
| 16 Nucleus                | <sup>1</sup> H                                                 |
| 17 Acquired Size          | 32768                                                          |
| 18 Spectral Size          | 65536                                                          |

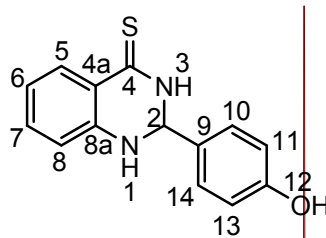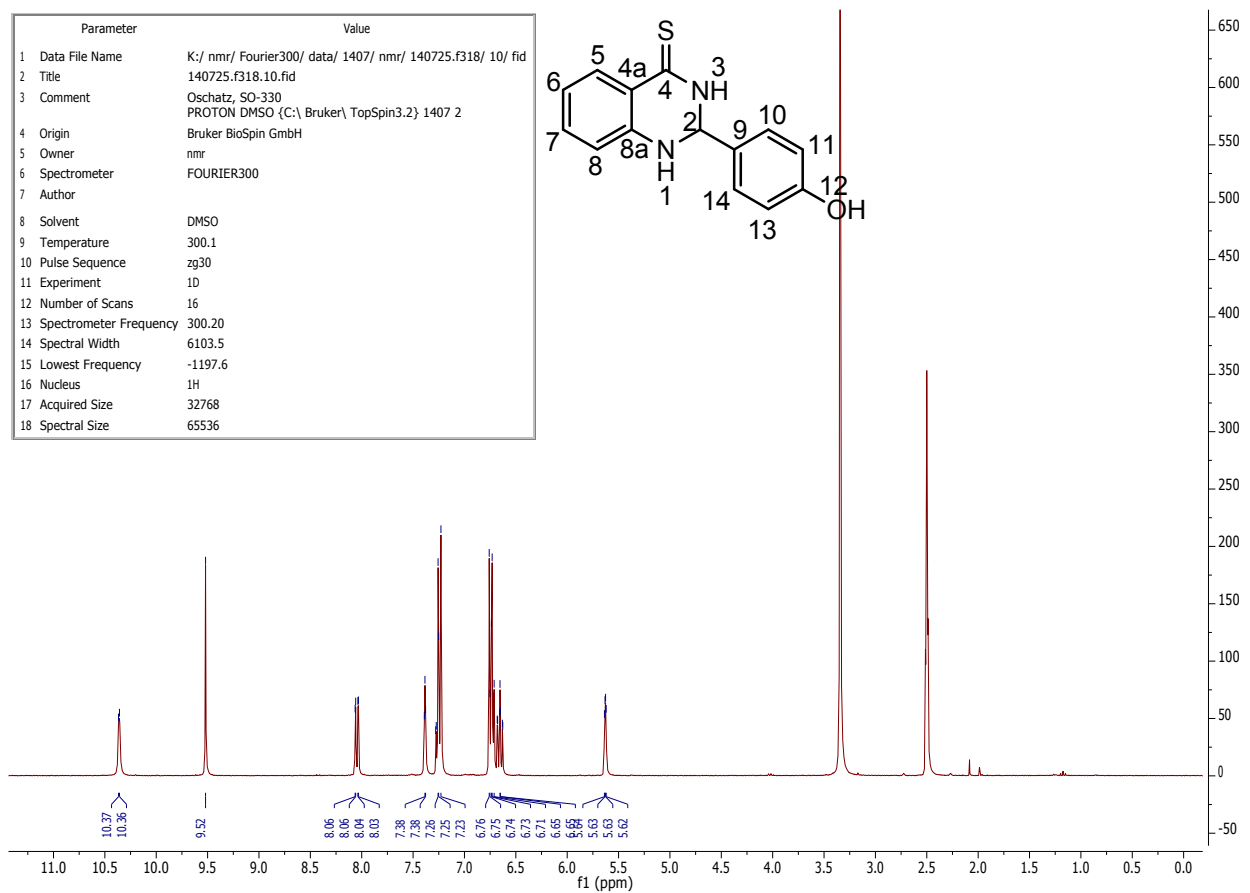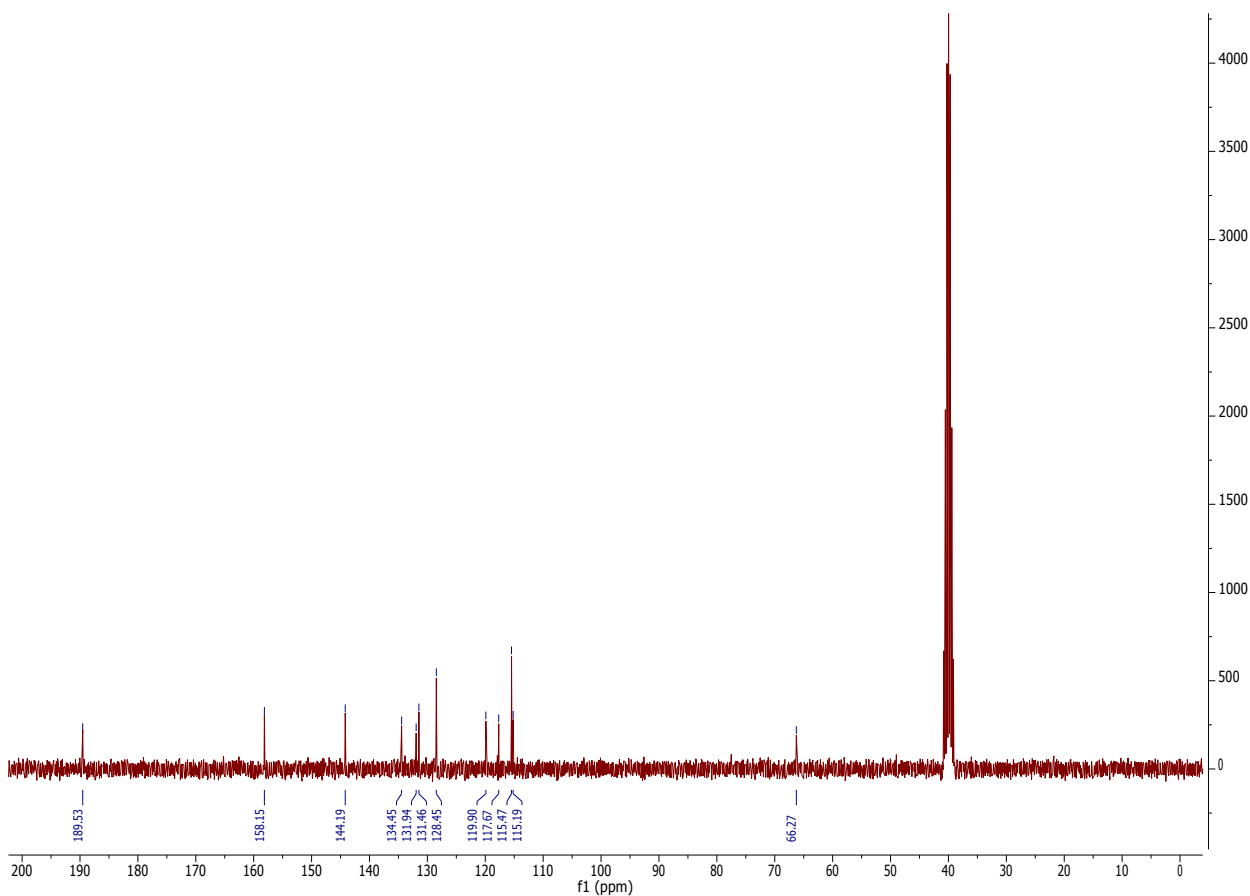

## 2-(Isopropyl)-2,3-dihydroquinazoline-4(1H)-thione (2i):

| Parameter                 | Value                                            |
|---------------------------|--------------------------------------------------|
| 1 Data File Name          | C:/ Users/ soscha/ Desktop/ 140612.u320/ 10/ fid |
| 2 Title                   | 140612.u320.10.fid                               |
| 3 Comment                 | Brunzel TB30 1H DMSO                             |
| 4 Origin                  | Bruker BioSpin GmbH                              |
| 5 Owner                   | nmsru                                            |
| 6 Spectrometer            | spect                                            |
| 7 Author                  |                                                  |
| 8 Solvent                 | DMSO                                             |
| 9 Temperature             | 298.2                                            |
| 10 Pulse Sequence         | zg30                                             |
| 11 Experiment             | 1D                                               |
| 12 Number of Scans        | 16                                               |
| 13 Spectrometer Frequency | 300.13                                           |
| 14 Spectral Width         | 6188.1                                           |
| 15 Lowest Frequency       | -1269.1                                          |
| 16 Nucleus                | 1H                                               |
| 17 Acquired Size          | 32768                                            |
| 18 Spectral Size          | 65536                                            |

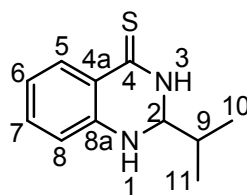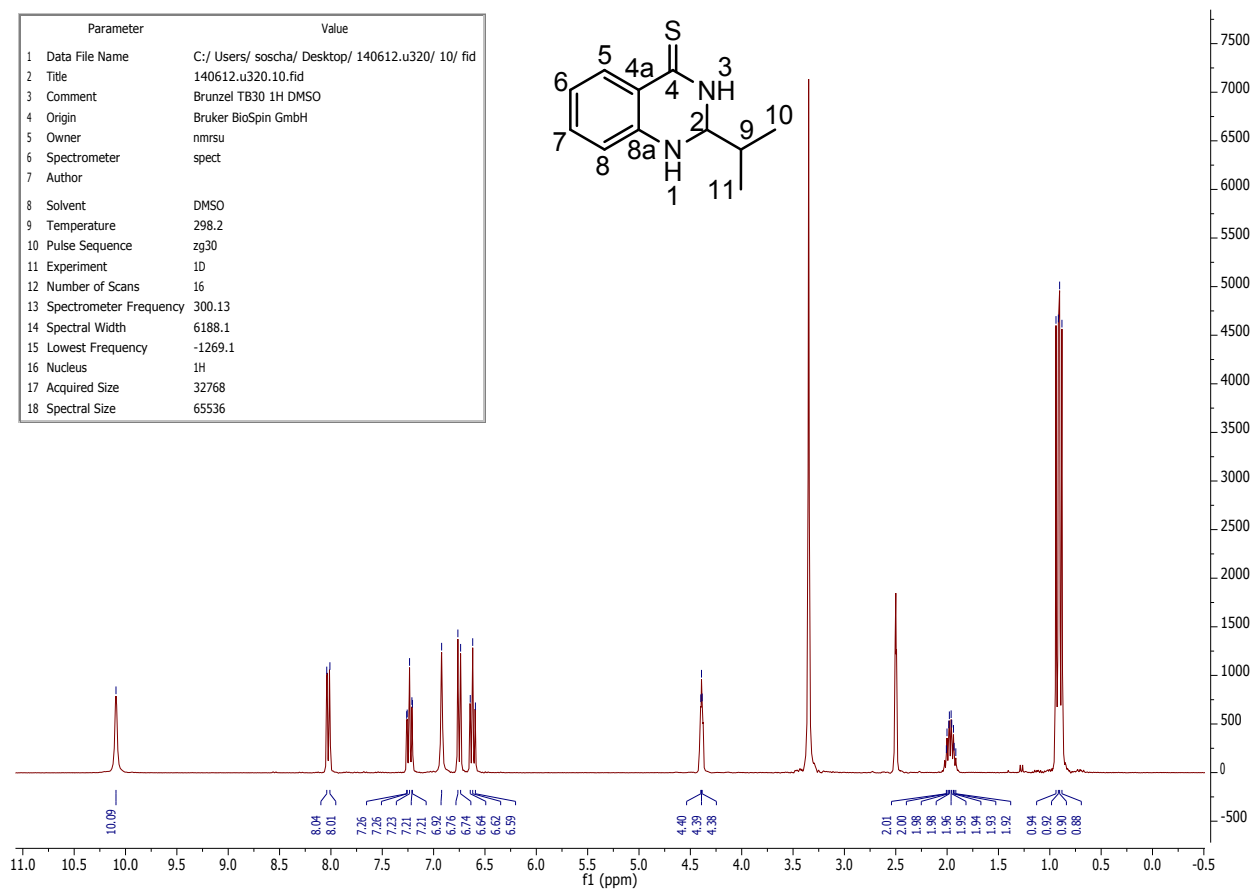

| Parameter                 | Value                                                     |
|---------------------------|-----------------------------------------------------------|
| 1 Data File Name          | C:/ Users/ Tom Brunzel/ Desktop/ NMR/ 140613.206/ 10/ fid |
| 2 Title                   | 140613.21                                                 |
| 3 Comment                 | Brunzel TB 30C 13C DMSO                                   |
| 4 Origin                  | Bruker BioSpin GmbH                                       |
| 5 Owner                   | nmr                                                       |
| 6 Site                    |                                                           |
| 7 Spectrometer            | spect                                                     |
| 8 Author                  |                                                           |
| 9 Solvent                 | DMSO                                                      |
| 10 Temperature            | 298.0                                                     |
| 11 Pulse Sequence         | zgpg30                                                    |
| 12 Number of Scans        | 1024                                                      |
| 13 Receiver Gain          | 2050                                                      |
| 14 Relaxation Delay       | 2.0000                                                    |
| 15 Pulse Width            | 10.0000                                                   |
| 16 Acquisition Time       | 2.1846                                                    |
| 17 Acquisition Date       | 2014-06-13T23:30:00                                       |
| 18 Modification Date      | 2014-06-13T22:30:42                                       |
| 19 Spectrometer Frequency | 62.90                                                     |
| 20 Spectral Width         | 15000.0                                                   |
| 21 Lowest Frequency       | -1238.8                                                   |
| 22 Nucleus                | 13C                                                       |
| 23 Acquired Size          | 32768                                                     |
| 24 Spectral Size          | 65536                                                     |

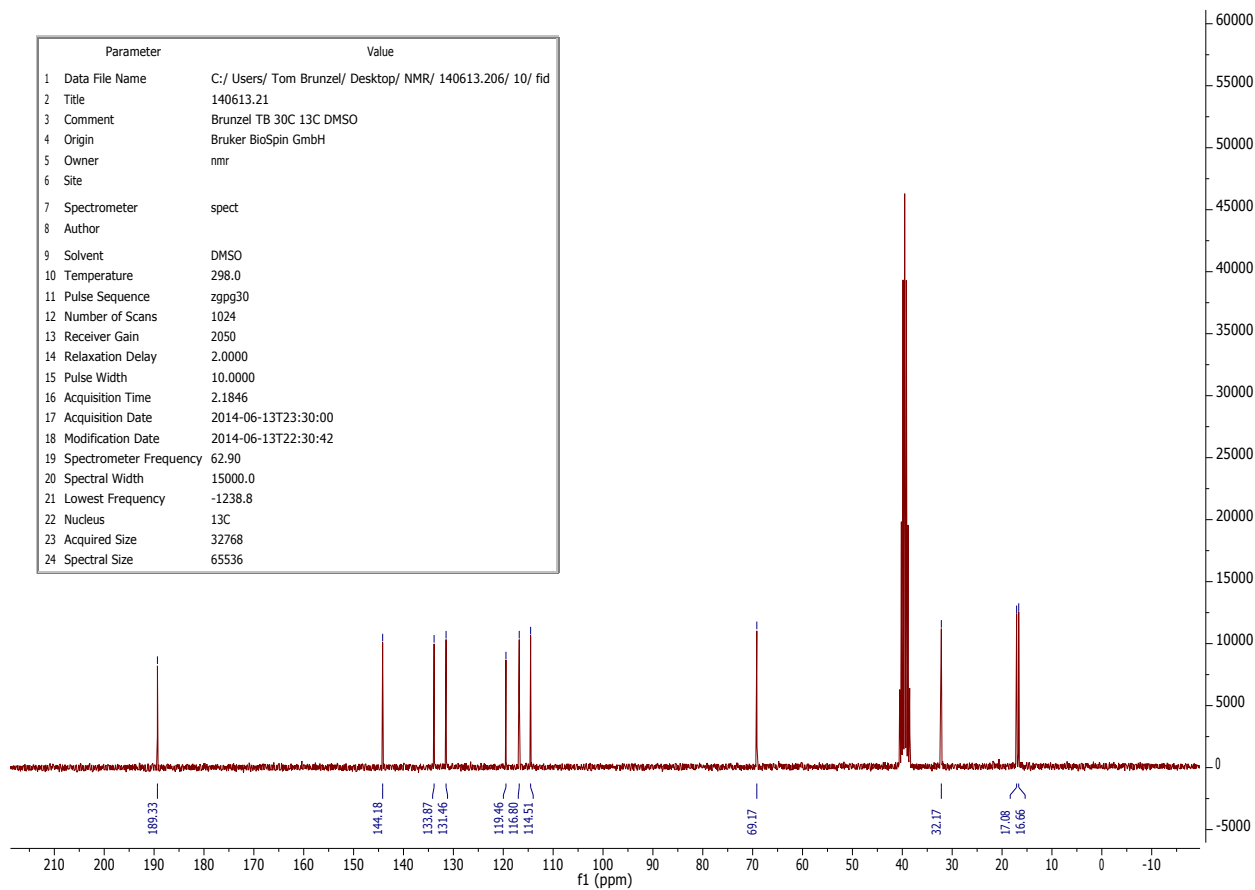

## 2-(Cyclohexyl)-2,3-dihydroquinazoline-4(1H)-thione (2j):

| Parameter                 | Value                                                      |
|---------------------------|------------------------------------------------------------|
| 1 Data File Name          | C:/ Users/ Tom Brunzel/ Desktop/ NMR/ 140612.u319/ 10/ fid |
| 2 Title                   | 140612.u319                                                |
| 3 Comment                 | Brunzel TB28 1H DMSO                                       |
| 4 Origin                  | Bruker BioSpin GmbH                                        |
| 5 Owner                   | nmrsu                                                      |
| 6 Site                    |                                                            |
| 7 Spectrometer            | spect                                                      |
| 8 Author                  |                                                            |
| 9 Solvent                 | DMSO                                                       |
| 10 Temperature            | 298.2                                                      |
| 11 Pulse Sequence         | zg30                                                       |
| 12 Number of Scans        | 16                                                         |
| 13 Receiver Gain          | 90                                                         |
| 14 Relaxation Delay       | 1.0000                                                     |
| 15 Pulse Width            | 10.0000                                                    |
| 16 Acquisition Time       | 5.2954                                                     |
| 17 Acquisition Date       | 2014-06-12T12:18:00                                        |
| 18 Modification Date      | 2014-06-12T11:18:14                                        |
| 19 Spectrometer Frequency | 300.13                                                     |
| 20 Spectral Width         | 6188.1                                                     |
| 21 Lowest Frequency       | -1313.6                                                    |
| 22 Nucleus                | 1H                                                         |
| 23 Acquired Size          | 32768                                                      |
| 24 Spectral Size          | 65536                                                      |

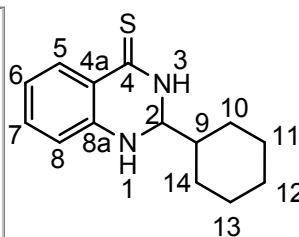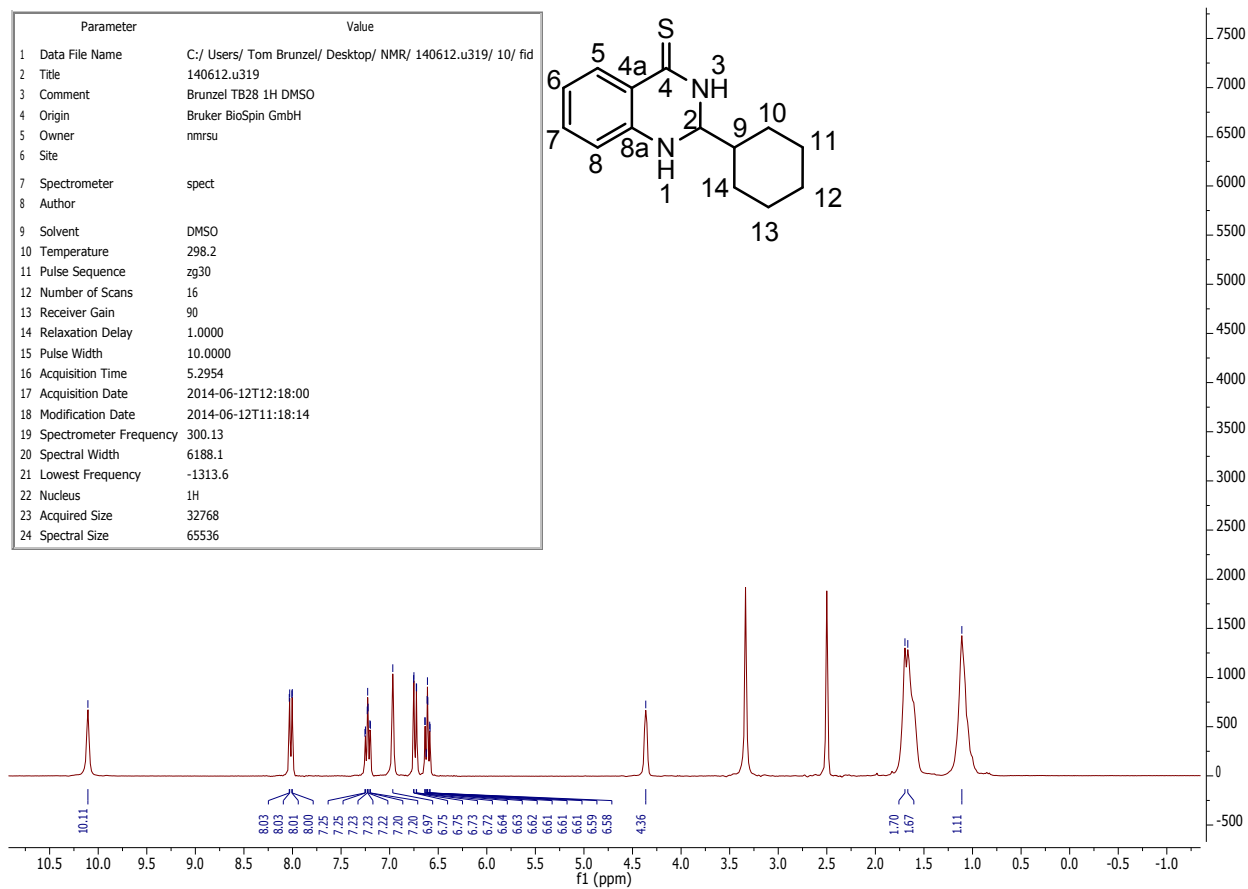

| Parameter                 | Value                                                     |
|---------------------------|-----------------------------------------------------------|
| 1 Data File Name          | C:/ Users/ Tom Brunzel/ Desktop/ NMR/ 140613.205/ 10/ fid |
| 2 Title                   | 140613.20                                                 |
| 3 Comment                 | Brunzel TB 28C 13C DMSO                                   |
| 4 Origin                  | Bruker BioSpin GmbH                                       |
| 5 Owner                   | nmr                                                       |
| 6 Site                    |                                                           |
| 7 Spectrometer            | spect                                                     |
| 8 Author                  |                                                           |
| 9 Solvent                 | DMSO                                                      |
| 10 Temperature            | 298.0                                                     |
| 11 Pulse Sequence         | zgpg30                                                    |
| 12 Number of Scans        | 1024                                                      |
| 13 Receiver Gain          | 2050                                                      |
| 14 Relaxation Delay       | 2.0000                                                    |
| 15 Pulse Width            | 10.0000                                                   |
| 16 Acquisition Time       | 2.1846                                                    |
| 17 Acquisition Date       | 2014-06-13T21:49:00                                       |
| 18 Modification Date      | 2014-06-13T20:49:28                                       |
| 19 Spectrometer Frequency | 62.90                                                     |
| 20 Spectral Width         | 15000.0                                                   |
| 21 Lowest Frequency       | -1239.6                                                   |
| 22 Nucleus                | 13C                                                       |
| 23 Acquired Size          | 32768                                                     |
| 24 Spectral Size          | 65536                                                     |

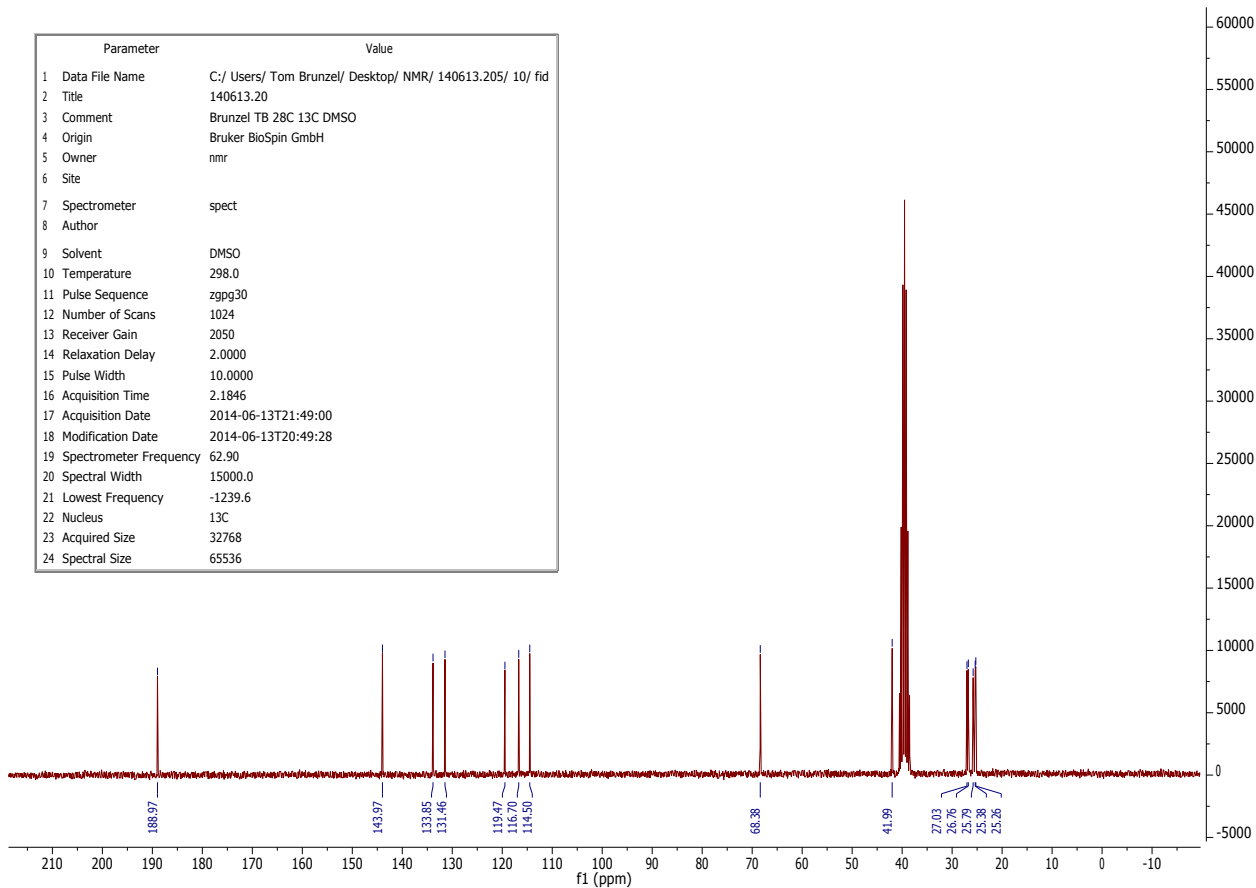

## 2-(Benzo[*b*]thiophen-2-yl)-2,3-dihydroquinazoline-4(1*H*)-thione (2k):

| Parameter                 | Value                                                           |
|---------------------------|-----------------------------------------------------------------|
| 1 Data File Name          | K:/ nmr/ Fourier300/ data/ 1407/ nmr/ 140725.f314/ 10/ fid      |
| 2 Title                   | 140725.f314.10.fid                                              |
| 3 Comment                 | Oschatz, SO-326<br>PROTON DMSO {C:\ Bruker\ TopSpin3.2} 1407 14 |
| 4 Origin                  | Bruker BioSpin GmbH                                             |
| 5 Owner                   | nmr                                                             |
| 6 Spectrometer            | FOURIER300                                                      |
| 7 Author                  |                                                                 |
| 8 Solvent                 | DMSO                                                            |
| 9 Temperature             | 299.9                                                           |
| 10 Pulse Sequence         | zg30                                                            |
| 11 Experiment             | 1D                                                              |
| 12 Number of Scans        | 16                                                              |
| 13 Spectrometer Frequency | 300.20                                                          |
| 14 Spectral Width         | 6103.5                                                          |
| 15 Lowest Frequency       | -1197.9                                                         |
| 16 Nucleus                | <sup>1</sup> H                                                  |
| 17 Acquired Size          | 32768                                                           |
| 18 Spectral Size          | 65536                                                           |

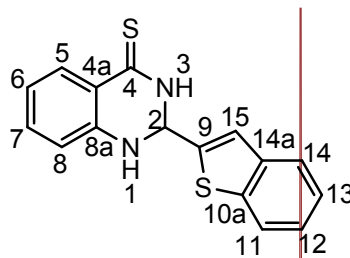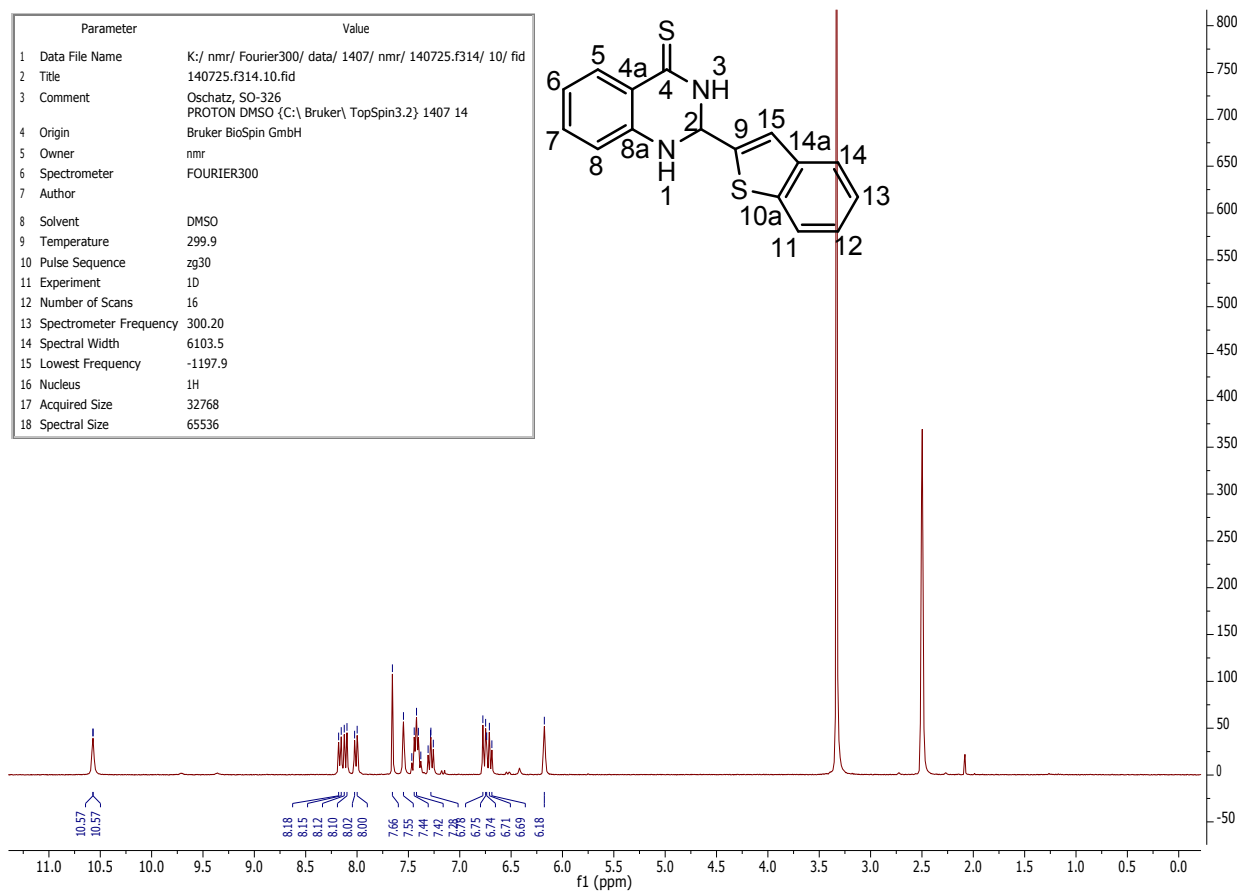

| Parameter                 | Value                                                          |
|---------------------------|----------------------------------------------------------------|
| 1 Data File Name          | K:/ nmr/ Fourier300/ data/ 1407/ nmr/ 140729.f307/ 10/ fid     |
| 2 Title                   | 140729.f307.10.fid                                             |
| 3 Comment                 | Oschatz, SO-326<br>C13CPD DMSO {C:\ Bruker\ TopSpin3.2} 1407 7 |
| 4 Origin                  | Bruker BioSpin GmbH                                            |
| 5 Owner                   | nmr                                                            |
| 6 Spectrometer            | FOURIER300                                                     |
| 7 Author                  |                                                                |
| 8 Solvent                 | DMSO                                                           |
| 9 Temperature             | 300.6                                                          |
| 10 Pulse Sequence         | zgpg30                                                         |
| 11 Experiment             | 1D                                                             |
| 12 Number of Scans        | 256                                                            |
| 13 Spectrometer Frequency | 75.49                                                          |
| 14 Spectral Width         | 24414.1                                                        |
| 15 Lowest Frequency       | -4658.8                                                        |
| 16 Nucleus                | <sup>13</sup> C                                                |
| 17 Acquired Size          | 32768                                                          |
| 18 Spectral Size          | 65536                                                          |

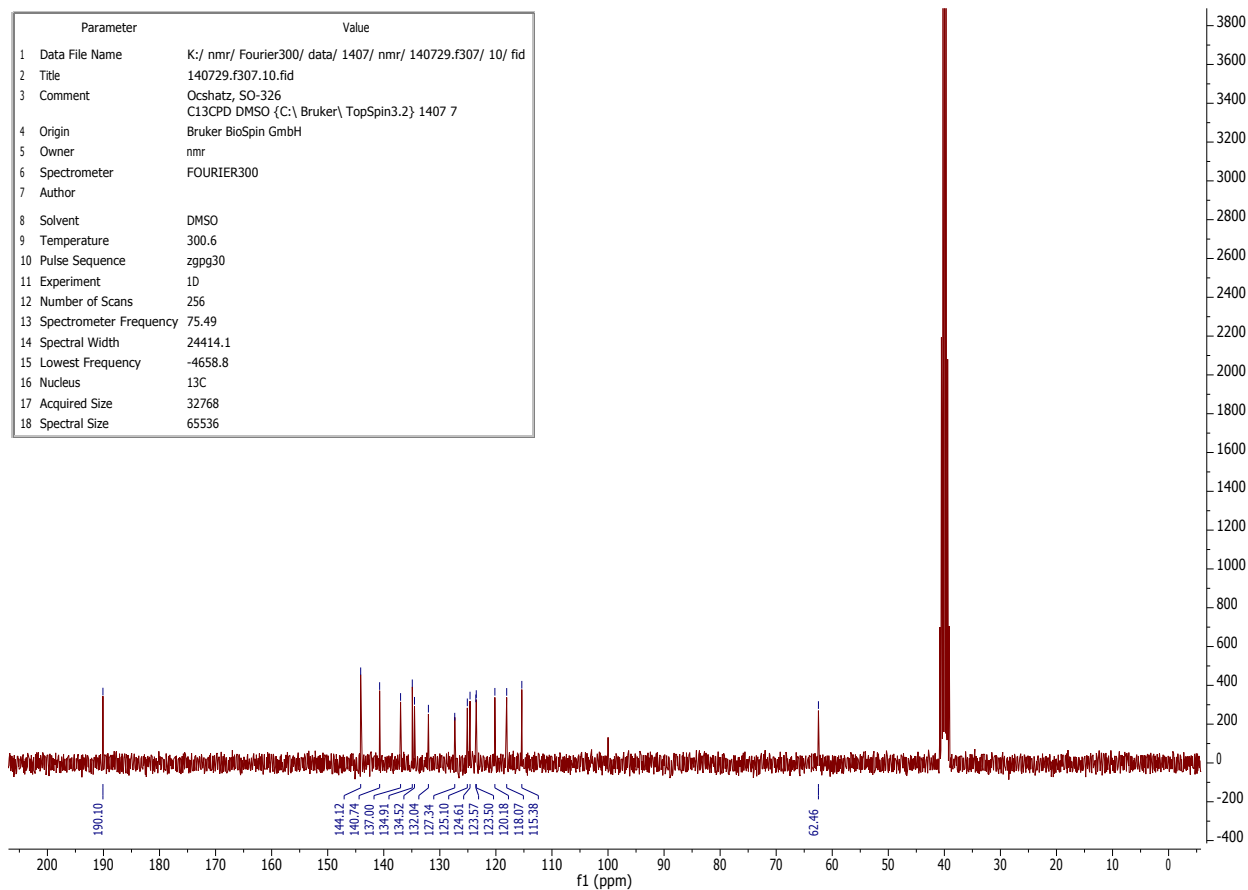

## 2-Pentyl-2,3-dihydroquinazoline-4(1H)-thione (2l):

| Parameter                 | Value                                                      |
|---------------------------|------------------------------------------------------------|
| 1 Data File Name          | K:/ nmr/ Fourier300/ data/ 1409/ nmr/ 130901.f318/ 10/ fid |
| 2 Title                   | 130901.f318.10.fid                                         |
| 3 Comment                 | SO-337<br>PROTON DMSO {C:\ Bruker\ TopSpin3.2} 1409 3      |
| 4 Origin                  | Bruker BioSpin GmbH                                        |
| 5 Owner                   | nmr                                                        |
| 6 Spectrometer            | FOURIER300                                                 |
| 7 Author                  |                                                            |
| 8 Solvent                 | DMSO                                                       |
| 9 Temperature             | 298.8                                                      |
| 10 Pulse Sequence         | zg30                                                       |
| 11 Experiment             | 1D                                                         |
| 12 Number of Scans        | 16                                                         |
| 13 Spectrometer Frequency | 300.20                                                     |
| 14 Spectral Width         | 6103.5                                                     |
| 15 Lowest Frequency       | -1197.3                                                    |
| 16 Nucleus                | <sup>1</sup> H                                             |
| 17 Acquired Size          | 32768                                                      |
| 18 Spectral Size          | 65536                                                      |

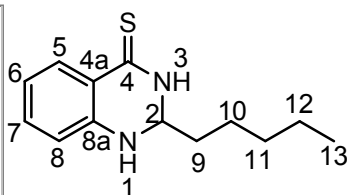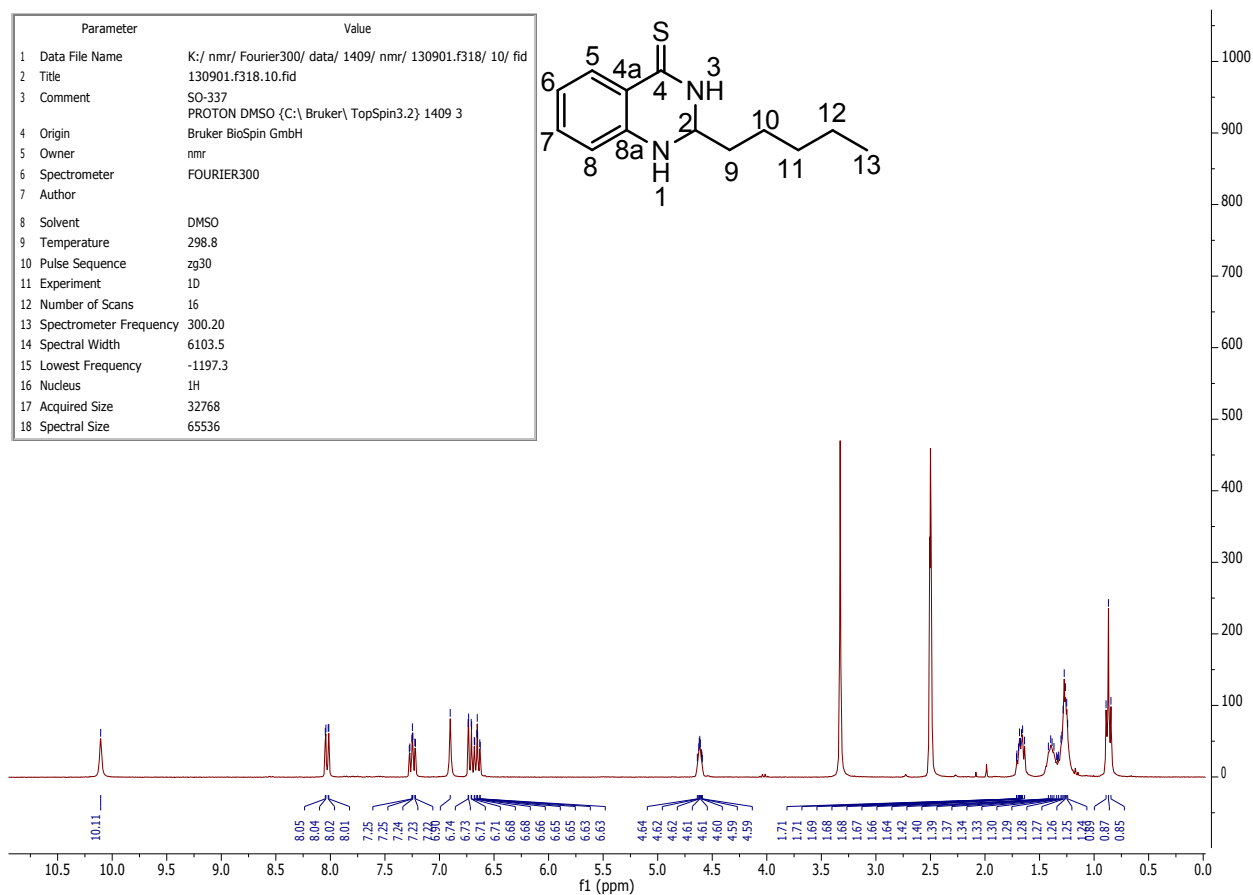

| Parameter                 | Value                                                |
|---------------------------|------------------------------------------------------|
| 1 Data File Name          | L:/ NMR300/ data/ 1408/ nmr/ 140821.346/ 10/ fid     |
| 2 Title                   | 140821.346.10.fid                                    |
| 3 Comment                 | Oschatz/ OS-337<br>Au13C DMSO / opt/ topspin 1408 46 |
| 4 Origin                  | Bruker BioSpin GmbH                                  |
| 5 Owner                   | labor                                                |
| 6 Spectrometer            | AV300                                                |
| 7 Author                  |                                                      |
| 8 Solvent                 | DMSO                                                 |
| 9 Temperature             | 295.0                                                |
| 10 Pulse Sequence         | zgpg30                                               |
| 11 Experiment             | 1D                                                   |
| 12 Number of Scans        | 256                                                  |
| 13 Spectrometer Frequency | 75.48                                                |
| 14 Spectral Width         | 21097.0                                              |
| 15 Lowest Frequency       | -1152.8                                              |
| 16 Nucleus                | <sup>13</sup> C                                      |
| 17 Acquired Size          | 16384                                                |
| 18 Spectral Size          | 32768                                                |

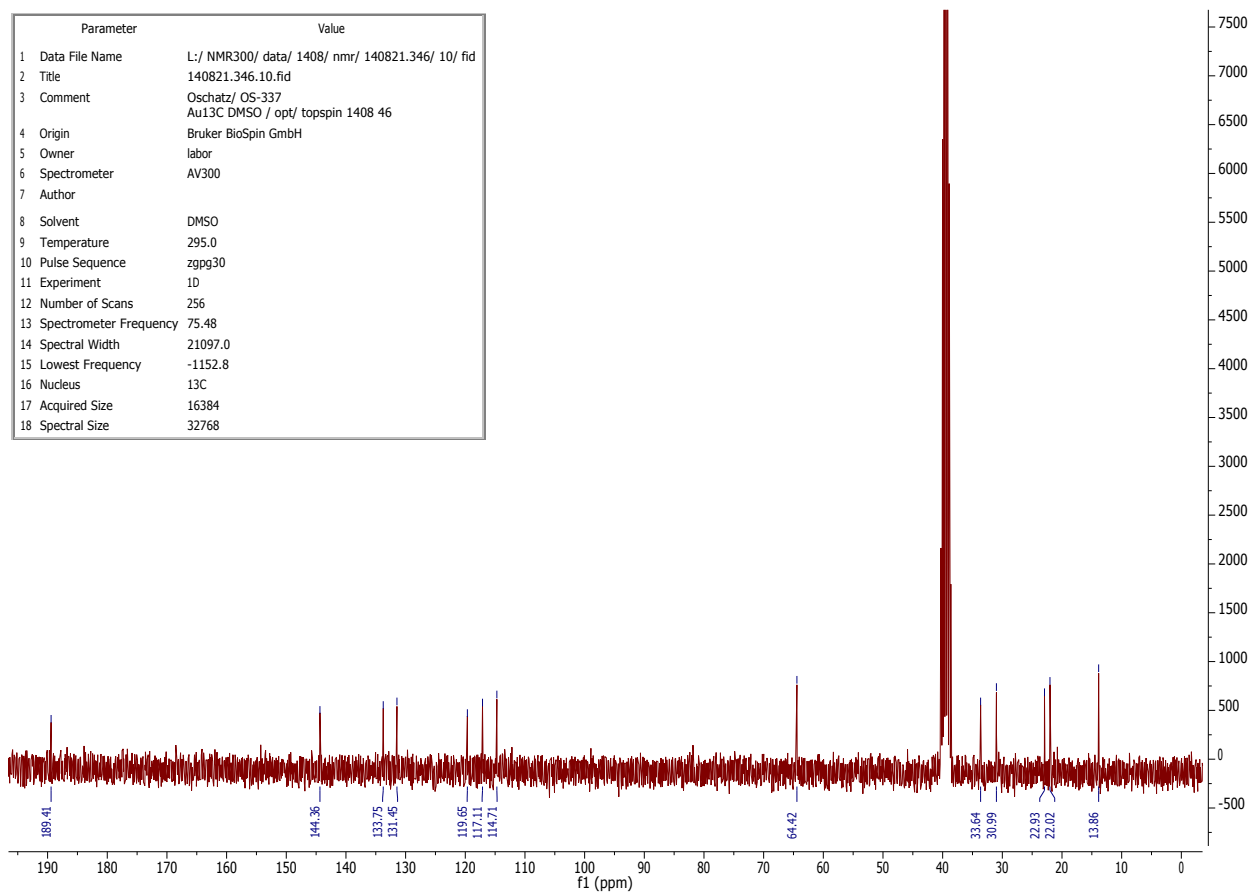



## 2-Methyl-2,3-dihydroquinazoline-4(1H)-thione (2m)

| Parameter                 | Value                                                      |
|---------------------------|------------------------------------------------------------|
| 1 Data File Name          | K:/ nmr/ Fourier300/ data/ 1409/ nmr/ 130901.f319/ 10/ fid |
| 2 Title                   | 130901.f319.10.fid                                         |
| 3 Comment                 | SO-341<br>PROTON DMSO {C:\ Bruker\ TopSpin3.2} 1409 4      |
| 4 Origin                  | Bruker BioSpin GmbH                                        |
| 5 Owner                   | nmr                                                        |
| 6 Spectrometer            | FOURIER300                                                 |
| 7 Author                  |                                                            |
| 8 Solvent                 | DMSO                                                       |
| 9 Temperature             | 298.8                                                      |
| 10 Pulse Sequence         | zg30                                                       |
| 11 Experiment             | 1D                                                         |
| 12 Number of Scans        | 16                                                         |
| 13 Spectrometer Frequency | 300.20                                                     |
| 14 Spectral Width         | 6103.5                                                     |
| 15 Lowest Frequency       | -1197.6                                                    |
| 16 Nucleus                | <sup>1</sup> H                                             |
| 17 Acquired Size          | 32768                                                      |
| 18 Spectral Size          | 65536                                                      |

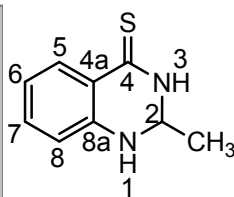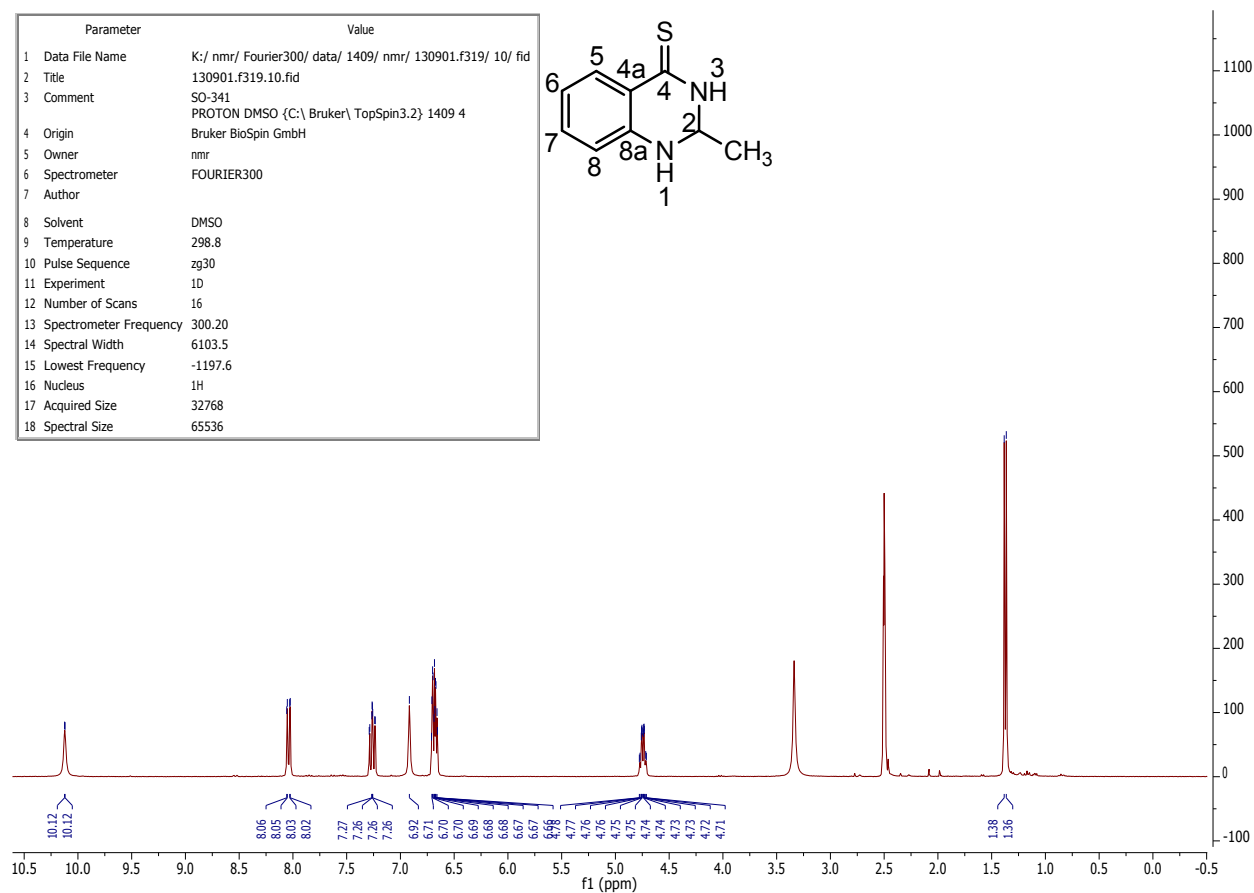

| Parameter                 | Value                                                      |
|---------------------------|------------------------------------------------------------|
| 1 Data File Name          | K:/ nmr/ Fourier300/ data/ 1409/ nmr/ 130901.f319/ 11/ fid |
| 2 Title                   | 130901.f319.11.fid                                         |
| 3 Comment                 | SO-341<br>C13CPD DMSO {C:\ Bruker\ TopSpin3.2} 1409 4      |
| 4 Origin                  | Bruker BioSpin GmbH                                        |
| 5 Owner                   | nmr                                                        |
| 6 Spectrometer            | FOURIER300                                                 |
| 7 Author                  |                                                            |
| 8 Solvent                 | DMSO                                                       |
| 9 Temperature             | 298.8                                                      |
| 10 Pulse Sequence         | zgpg30                                                     |
| 11 Experiment             | 1D                                                         |
| 12 Number of Scans        | 256                                                        |
| 13 Spectrometer Frequency | 75.49                                                      |
| 14 Spectral Width         | 24414.1                                                    |
| 15 Lowest Frequency       | -4693.5                                                    |
| 16 Nucleus                | <sup>13</sup> C                                            |
| 17 Acquired Size          | 32768                                                      |
| 18 Spectral Size          | 65536                                                      |

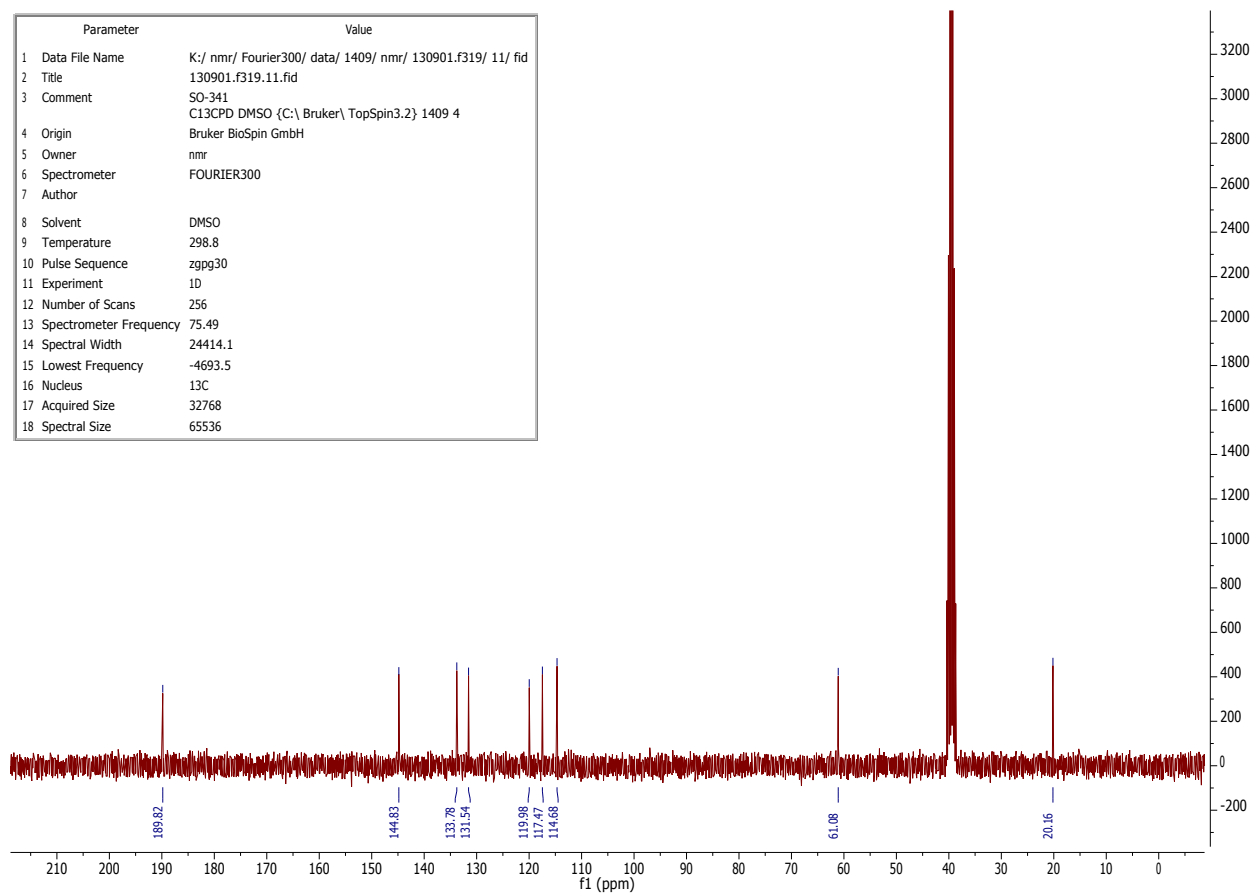

## 6-Chloro-2-phenyl-2,3-dihydroquinazoline-4(1H)-thione (2n):

| Parameter                 | Value                                                |
|---------------------------|------------------------------------------------------|
| 1 Data File Name          | C:/Users/Tom Brunzel/Desktop/NMR/140626.u319/10/ fid |
| 2 Title                   | 140626.u319                                          |
| 3 Comment                 | Brunzel TB42 1H DMSO                                 |
| 4 Origin                  | Bruker BioSpin GmbH                                  |
| 5 Owner                   | nmsu                                                 |
| 6 Site                    |                                                      |
| 7 Spectrometer            | spect                                                |
| 8 Author                  |                                                      |
| 9 Solvent                 | DMSO                                                 |
| 10 Temperature            | 299.2                                                |
| 11 Pulse Sequence         | zg30                                                 |
| 12 Number of Scans        | 16                                                   |
| 13 Receiver Gain          | 161                                                  |
| 14 Relaxation Delay       | 1.0000                                               |
| 15 Pulse Width            | 10.0000                                              |
| 16 Acquisition Time       | 5.2954                                               |
| 17 Acquisition Date       | 2014-06-26T13:28:00                                  |
| 18 Modification Date      | 2014-06-26T12:28:28                                  |
| 19 Spectrometer Frequency | 300.13                                               |
| 20 Spectral Width         | 6188.1                                               |
| 21 Lowest Frequency       | -1264.3                                              |
| 22 Nucleus                | 1H                                                   |
| 23 Acquired Size          | 32768                                                |
| 24 Spectral Size          | 65536                                                |

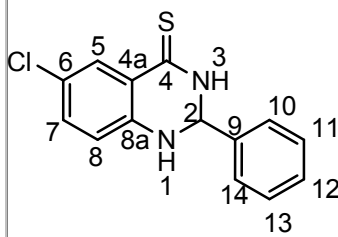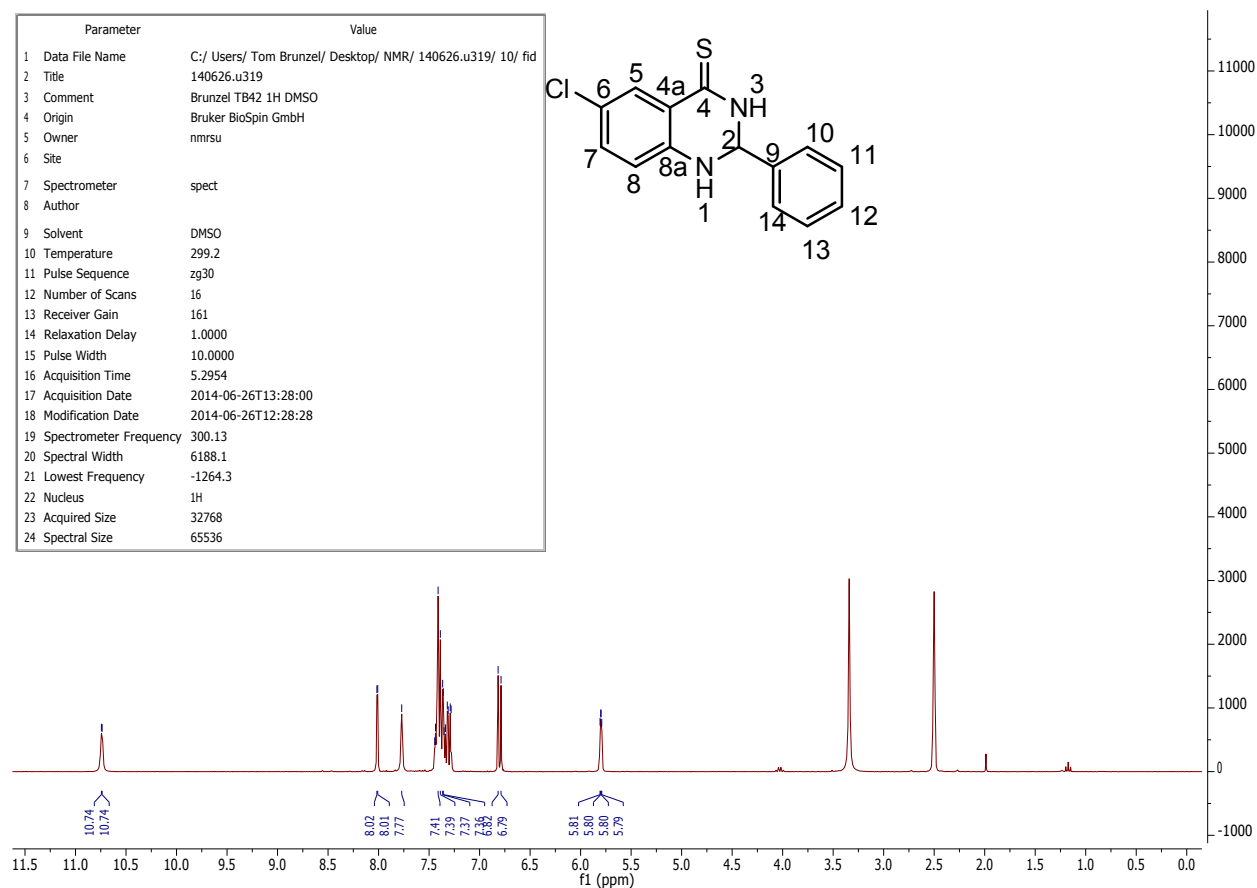

| Parameter                 | Value                                                |
|---------------------------|------------------------------------------------------|
| 1 Data File Name          | C:/Users/Tom Brunzel/Desktop/NMR/140626.u319/12/ fid |
| 2 Title                   | 140626.u319                                          |
| 3 Comment                 | Brunzel TB42 13C DMSO                                |
| 4 Origin                  | Bruker BioSpin GmbH                                  |
| 5 Owner                   | nmsu                                                 |
| 6 Site                    |                                                      |
| 7 Spectrometer            | spect                                                |
| 8 Author                  |                                                      |
| 9 Solvent                 | DMSO                                                 |
| 10 Temperature            | 300.1                                                |
| 11 Pulse Sequence         | zgpg30                                               |
| 12 Number of Scans        | 1024                                                 |
| 13 Receiver Gain          | 2050                                                 |
| 14 Relaxation Delay       | 2.0000                                               |
| 15 Pulse Width            | 10.0000                                              |
| 16 Acquisition Time       | 1.8176                                               |
| 17 Acquisition Date       | 2014-06-26T23:54:00                                  |
| 18 Modification Date      | 2014-06-26T22:54:32                                  |
| 19 Spectrometer Frequency | 75.47                                                |
| 20 Spectral Width         | 18028.8                                              |
| 21 Lowest Frequency       | -1510.4                                              |
| 22 Nucleus                | 13C                                                  |
| 23 Acquired Size          | 32768                                                |
| 24 Spectral Size          | 65536                                                |

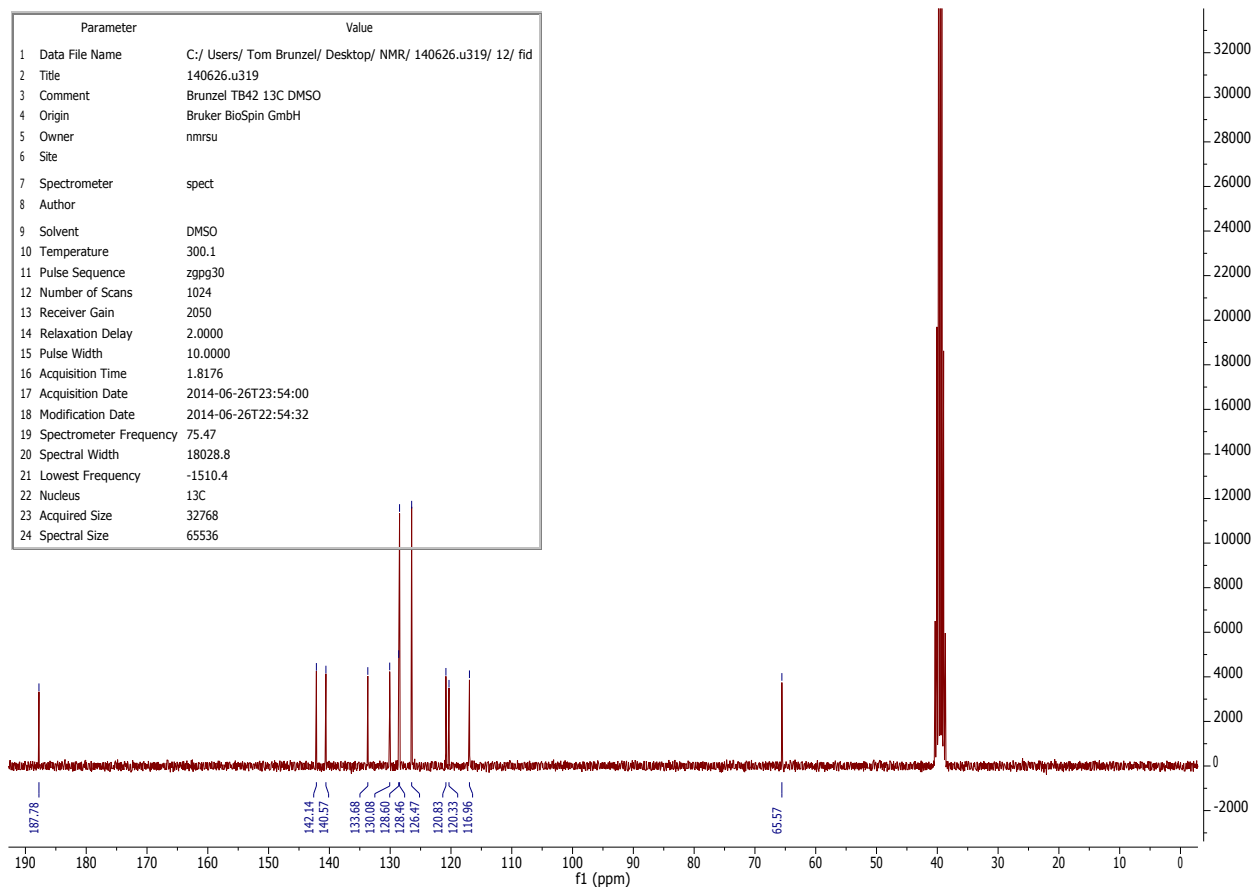

# 6-Nitro-2-phenyl-2,3-dihydroquinazoline-4(1H)-thione (2o)

| Parameter                 | Value                                               |
|---------------------------|-----------------------------------------------------|
| 1 Data File Name          | C:/Users/Tom Brunzel/Desktop/NMR/140626.u320/10/fid |
| 2 Title                   | 140626.u320                                         |
| 3 Comment                 | Brunzel TB44 1H DMSO                                |
| 4 Origin                  | Bruker BioSpin GmbH                                 |
| 5 Owner                   | nmrsu                                               |
| 6 Site                    |                                                     |
| 7 Spectrometer            | spect                                               |
| 8 Author                  |                                                     |
| 9 Solvent                 | DMSO                                                |
| 10 Temperature            | 299.1                                               |
| 11 Pulse Sequence         | zg30                                                |
| 12 Number of Scans        | 16                                                  |
| 13 Receiver Gain          | 114                                                 |
| 14 Relaxation Delay       | 1.0000                                              |
| 15 Pulse Width            | 10.0000                                             |
| 16 Acquisition Time       | 5.2954                                              |
| 17 Acquisition Date       | 2014-06-26T13:33:00                                 |
| 18 Modification Date      | 2014-06-26T12:33:14                                 |
| 19 Spectrometer Frequency | 300.13                                              |
| 20 Spectral Width         | 6188.1                                              |
| 21 Lowest Frequency       | -1264.9                                             |
| 22 Nucleus                | 1H                                                  |
| 23 Acquired Size          | 32768                                               |
| 24 Spectral Size          | 65536                                               |

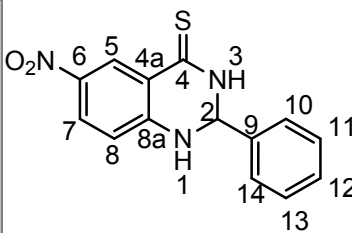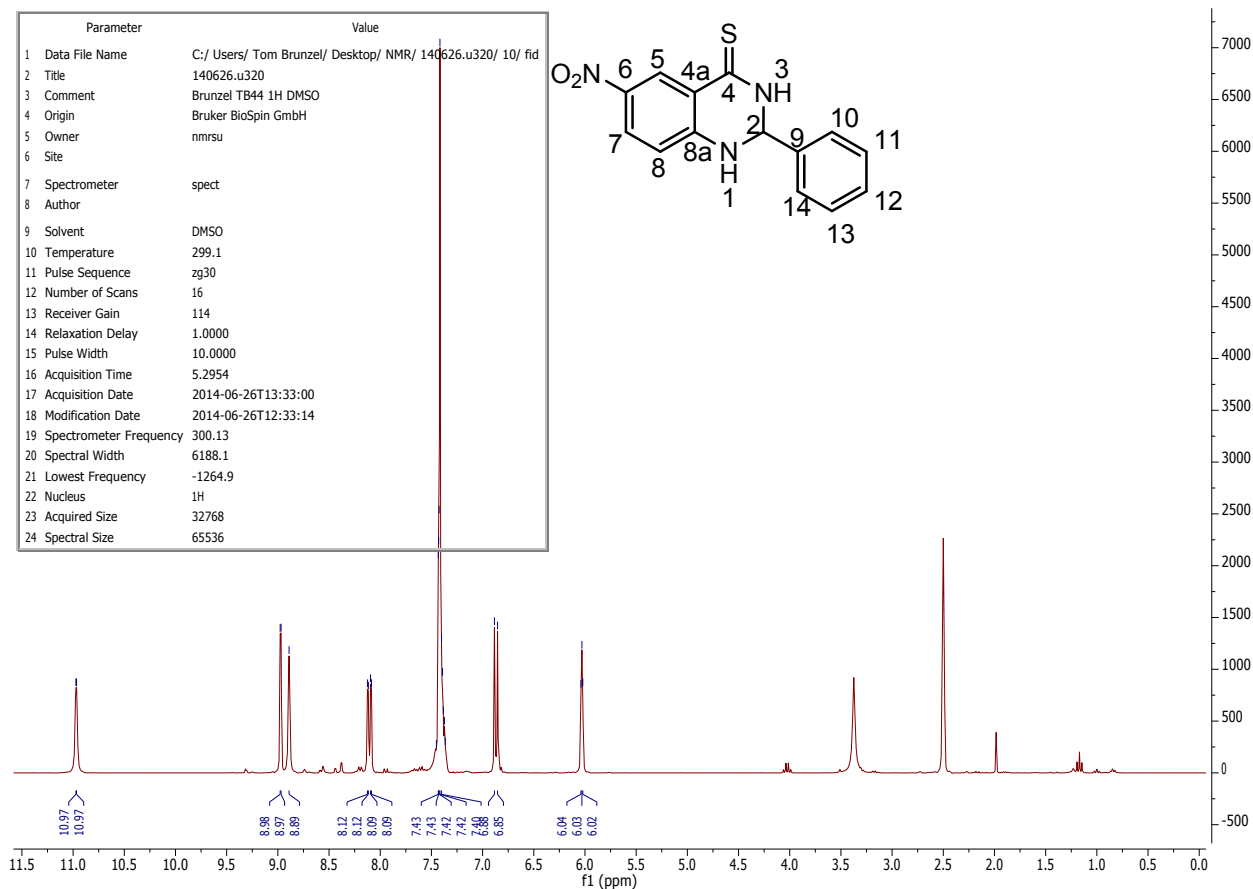

| Parameter                 | Value                                               |
|---------------------------|-----------------------------------------------------|
| 1 Data File Name          | C:/Users/Tom Brunzel/Desktop/NMR/140626.u320/12/fid |
| 2 Title                   | 140626.u320                                         |
| 3 Comment                 | Brunzel TB44 13C DMSO                               |
| 4 Origin                  | Bruker BioSpin GmbH                                 |
| 5 Owner                   | nmrsu                                               |
| 6 Site                    |                                                     |
| 7 Spectrometer            | spect                                               |
| 8 Author                  |                                                     |
| 9 Solvent                 | DMSO                                                |
| 10 Temperature            | 299.9                                               |
| 11 Pulse Sequence         | zpgg30                                              |
| 12 Number of Scans        | 1024                                                |
| 13 Receiver Gain          | 2050                                                |
| 14 Relaxation Delay       | 2.0000                                              |
| 15 Pulse Width            | 10.0000                                             |
| 16 Acquisition Time       | 1.8176                                              |
| 17 Acquisition Date       | 2014-06-27T01:04:00                                 |
| 18 Modification Date      | 2014-06-27T00:04:02                                 |
| 19 Spectrometer Frequency | 75.47                                               |
| 20 Spectral Width         | 18028.8                                             |
| 21 Lowest Frequency       | -1509.9                                             |
| 22 Nucleus                | 13C                                                 |
| 23 Acquired Size          | 32768                                               |
| 24 Spectral Size          | 65536                                               |

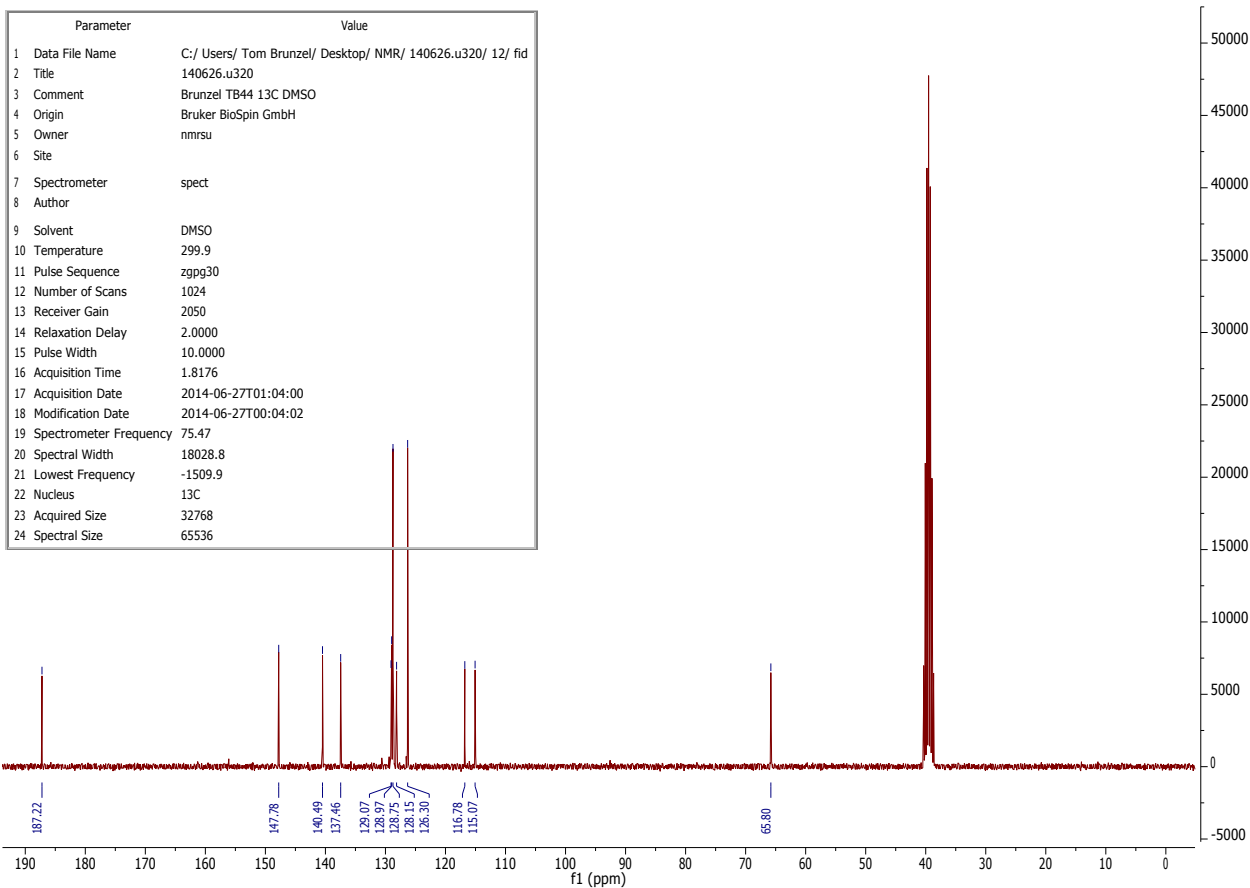

### 5-Fluoro-2-phenyl-2,3-dihydroquinazoline-4(1H)-thione (2p):

| Parameter                 | Value                                               |
|---------------------------|-----------------------------------------------------|
| 1 Data File Name          | C:/Users/Tom Brunzel/Desktop/NMR/140623.u330/10/fid |
| 2 Title                   | 140623.u330                                         |
| 3 Comment                 | Brunzel TB43 1H DMSO                                |
| 4 Origin                  | Bruker BioSpin GmbH                                 |
| 5 Owner                   | nmsu                                                |
| 6 Site                    |                                                     |
| 7 Spectrometer            | spect                                               |
| 8 Author                  |                                                     |
| 9 Solvent                 | DMSO                                                |
| 10 Temperature            | 298.2                                               |
| 11 Pulse Sequence         | zg30                                                |
| 12 Number of Scans        | 16                                                  |
| 13 Receiver Gain          | 181                                                 |
| 14 Relaxation Delay       | 1.0000                                              |
| 15 Pulse Width            | 10.0000                                             |
| 16 Acquisition Time       | 5.2954                                              |
| 17 Acquisition Date       | 2014-06-23T14:06:00                                 |
| 18 Modification Date      | 2014-06-23T13:06:32                                 |
| 19 Spectrometer Frequency | 300.13                                              |
| 20 Spectral Width         | 6188.1                                              |
| 21 Lowest Frequency       | -1258.9                                             |
| 22 Nucleus                | 1H                                                  |
| 23 Acquired Size          | 32768                                               |
| 24 Spectral Size          | 65536                                               |

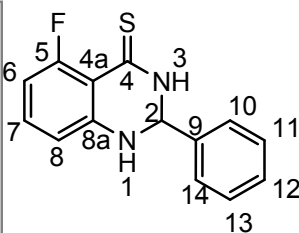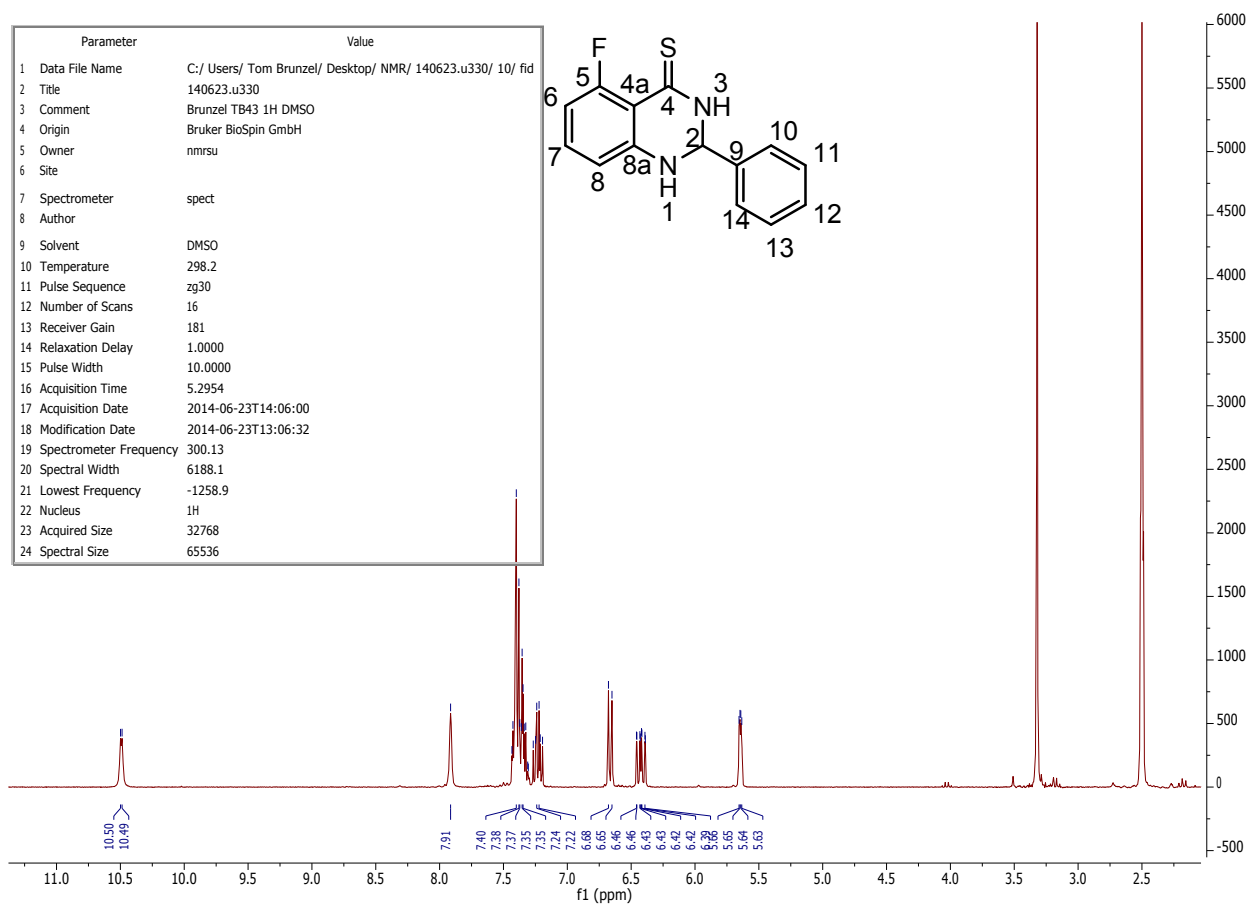

| Parameter                 | Value                                              |
|---------------------------|----------------------------------------------------|
| 1 Data File Name          | C:/Users/Tom Brunzel/Desktop/NMR/140623.207/10/fid |
| 2 Title                   | 140623.21                                          |
| 3 Comment                 | Brunzel TB43C 13C DMSO                             |
| 4 Origin                  | Bruker BioSpin GmbH                                |
| 5 Owner                   | nmr                                                |
| 6 Site                    |                                                    |
| 7 Spectrometer            | spect                                              |
| 8 Author                  |                                                    |
| 9 Solvent                 | DMSO                                               |
| 10 Temperature            | 298.0                                              |
| 11 Pulse Sequence         | zgpg30                                             |
| 12 Number of Scans        | 1024                                               |
| 13 Receiver Gain          | 2050                                               |
| 14 Relaxation Delay       | 2.0000                                             |
| 15 Pulse Width            | 10.0000                                            |
| 16 Acquisition Time       | 2.1846                                             |
| 17 Acquisition Date       | 2014-06-23T21:34:00                                |
| 18 Modification Date      | 2014-06-23T20:34:40                                |
| 19 Spectrometer Frequency | 62.90                                              |
| 20 Spectral Width         | 15000.0                                            |
| 21 Lowest Frequency       | -1239.8                                            |
| 22 Nucleus                | 13C                                                |
| 23 Acquired Size          | 32768                                              |
| 24 Spectral Size          | 65536                                              |

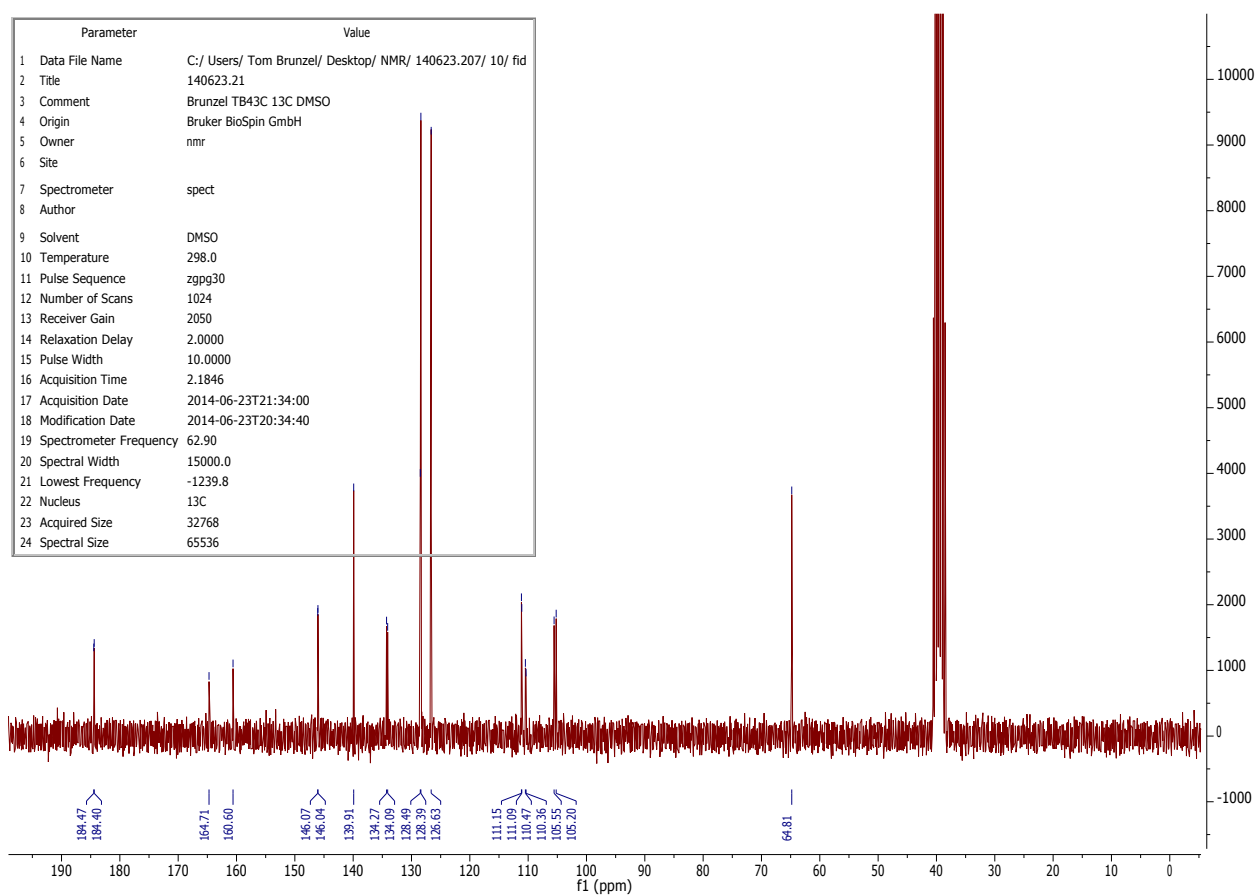

| Parameter                 | Value                                  |
|---------------------------|----------------------------------------|
| 1 Data File Name          | D:/ Tom NMR/ NMR/ 140623.u330/ 11/ fid |
| 2 Title                   | 140623.u330.11.fid                     |
| 3 Comment                 | Brunzel TB43 19F DMSO                  |
| 4 Origin                  | Bruker BioSpin GmbH                    |
| 5 Owner                   | nmsu                                   |
| 6 Spectrometer            | spect                                  |
| 7 Author                  |                                        |
| 8 Solvent                 | DMSO                                   |
| 9 Temperature             | 298.4                                  |
| 10 Pulse Sequence         | zgfhgqn                                |
| 11 Experiment             | 1D                                     |
| 12 Number of Scans        | 64                                     |
| 13 Spectrometer Frequency | 282.38                                 |
| 14 Spectral Width         | 66964.3                                |
| 15 Lowest Frequency       | -61722.4                               |
| 16 Nucleus                | 19F                                    |
| 17 Acquired Size          | 65536                                  |
| 18 Spectral Size          | 131072                                 |

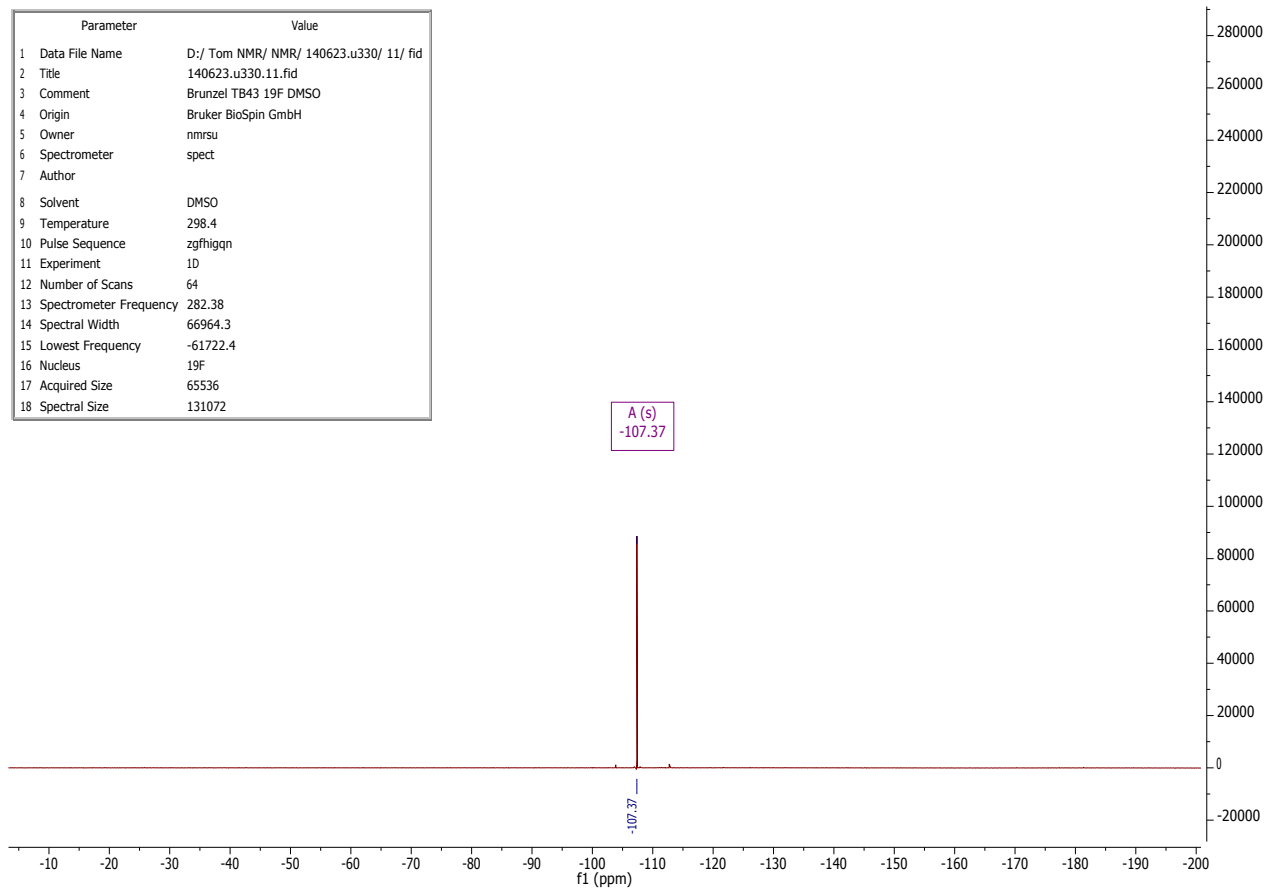

## 2-Phenyl-2,3-dihydropyrido[2,3-d]pyrimidine-4(1H)-thione (2q):

| Parameter                 | Value                                                      |
|---------------------------|------------------------------------------------------------|
| 1 Data File Name          | C:/ Users/ Tom Brunzel/ Desktop/ NMR/ 140627.u315/ 10/ fid |
| 2 Title                   | 140627.u315                                                |
| 3 Comment                 | Brunzel TB48 1H DMSO                                       |
| 4 Origin                  | Bruker BioSpin GmbH                                        |
| 5 Owner                   | nmsu                                                       |
| 6 Site                    |                                                            |
| 7 Spectrometer            | spect                                                      |
| 8 Author                  |                                                            |
| 9 Solvent                 | DMSO                                                       |
| 10 Temperature            | 299.2                                                      |
| 11 Pulse Sequence         | zg30                                                       |
| 12 Number of Scans        | 16                                                         |
| 13 Receiver Gain          | 114                                                        |
| 14 Relaxation Delay       | 1.0000                                                     |
| 15 Pulse Width            | 10.0000                                                    |
| 16 Acquisition Time       | 5.2954                                                     |
| 17 Acquisition Date       | 2014-06-27T11:55:00                                        |
| 18 Modification Date      | 2014-06-27T10:55:26                                        |
| 19 Spectrometer Frequency | 300.13                                                     |
| 20 Spectral Width         | 6188.1                                                     |
| 21 Lowest Frequency       | -1315.1                                                    |
| 22 Nucleus                | 1H                                                         |
| 23 Acquired Size          | 32768                                                      |
| 24 Spectral Size          | 65536                                                      |

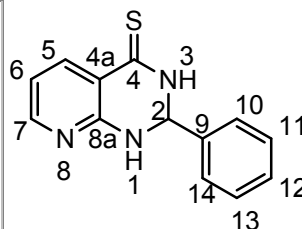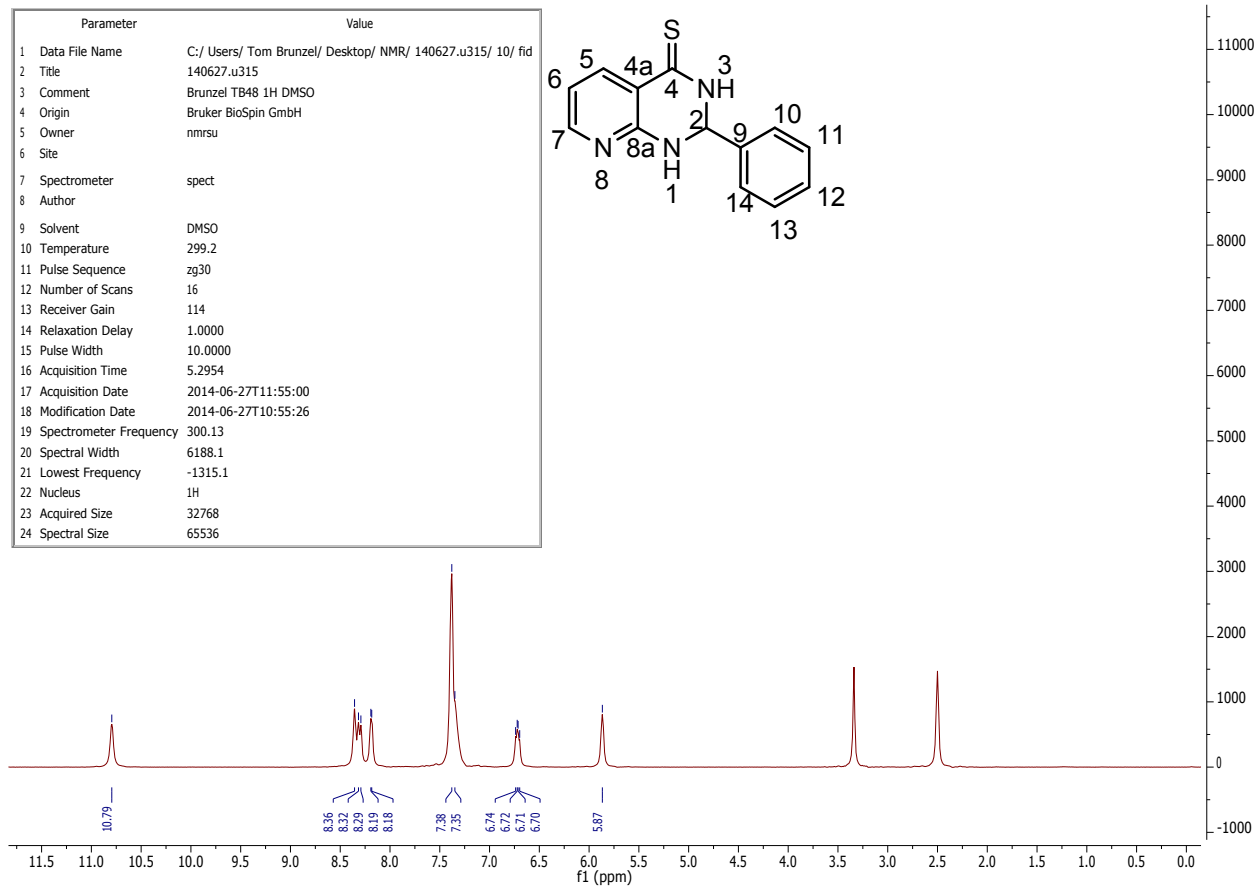

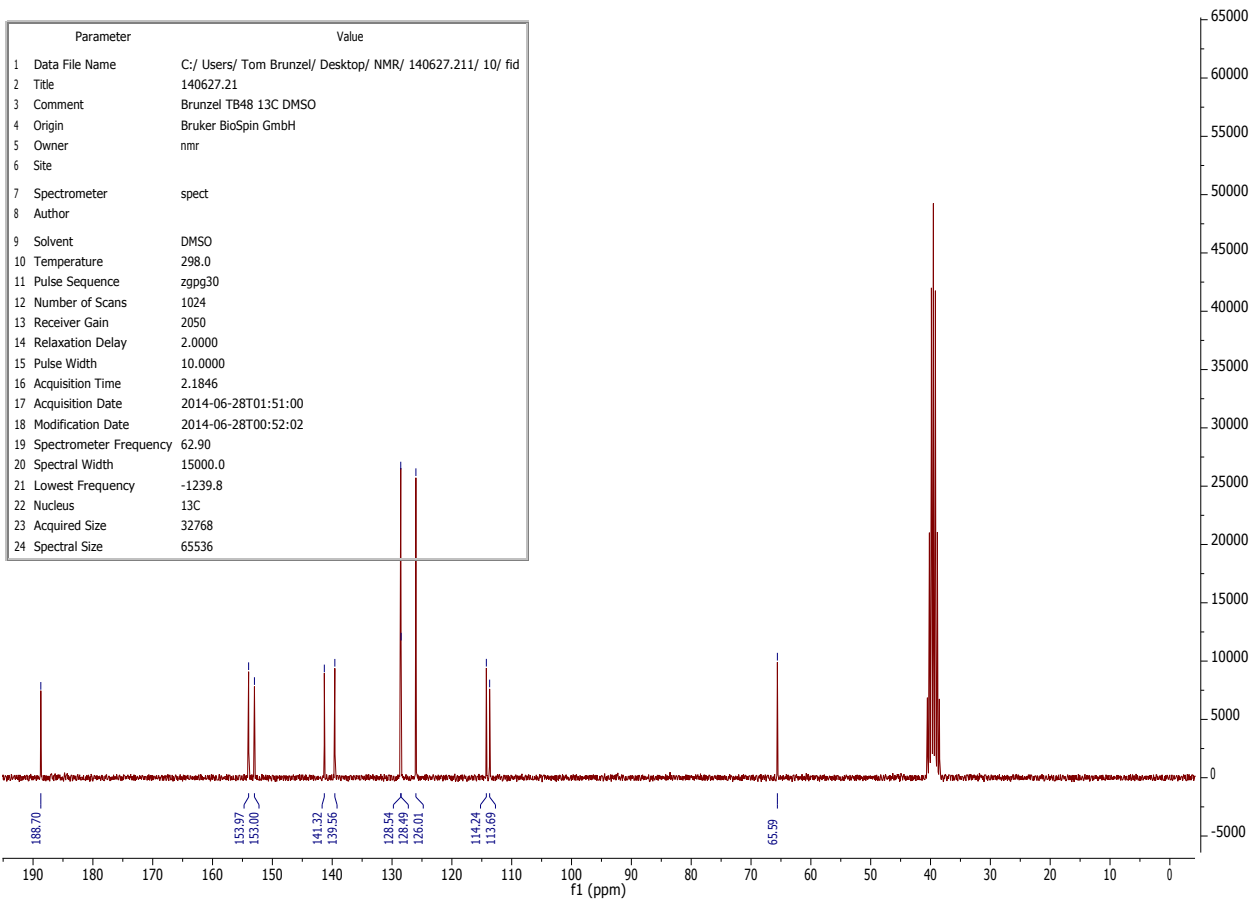

**7-Chloro-2-phenyl-2,3-dihydroquinazoline-4(1H)-thione (2r):**

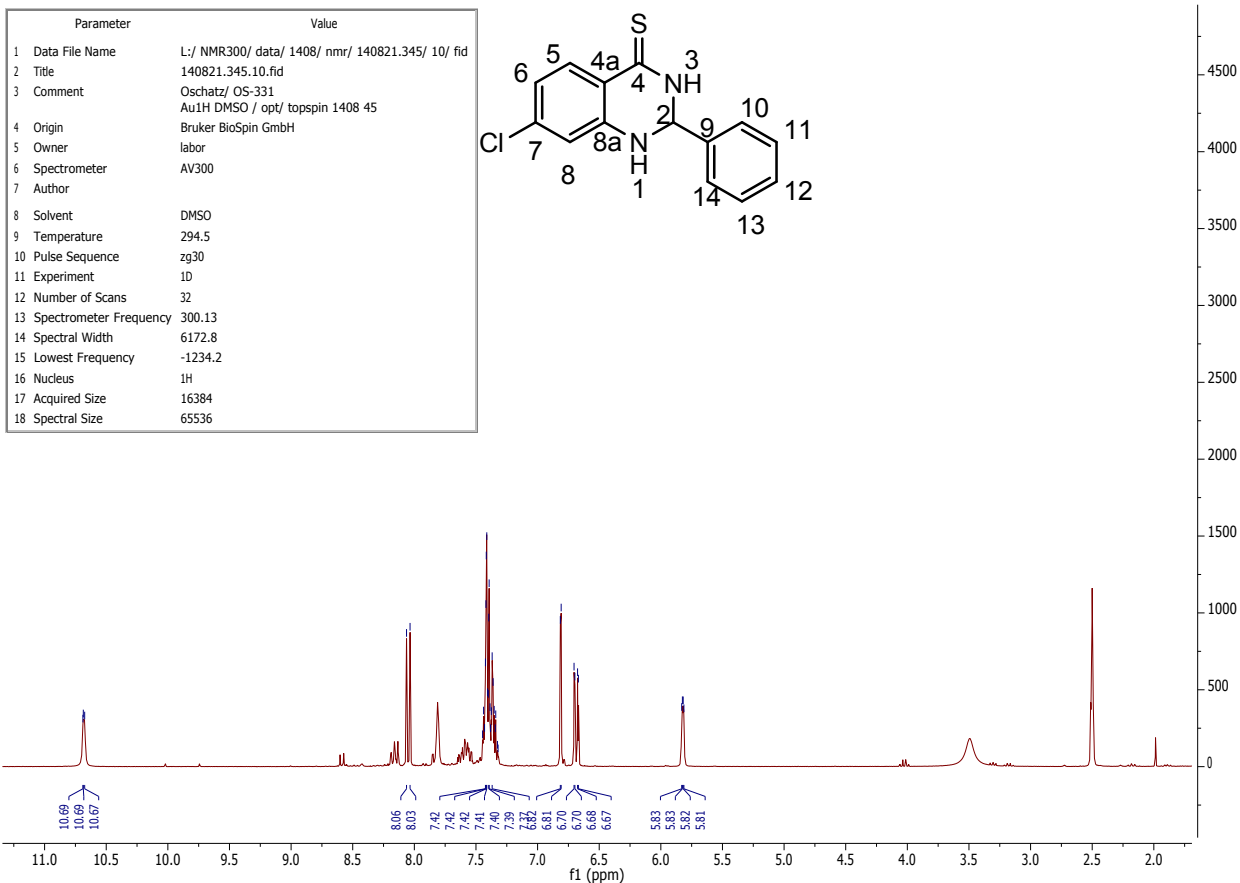

| Parameter                 | Value                                                |
|---------------------------|------------------------------------------------------|
| 1 Data File Name          | L:/ NMR300/ data/ 1408/ nmr/ 140821.345/ 11/ fid     |
| 2 Title                   | 140821.345.11.fid                                    |
| 3 Comment                 | Oschatz/ OS-331<br>Au13C DMSO / opt/ topspin 1408 45 |
| 4 Origin                  | Bruker BioSpin GmbH                                  |
| 5 Owner                   | labor                                                |
| 6 Spectrometer            | AV300                                                |
| 7 Author                  |                                                      |
| 8 Solvent                 | DMSO                                                 |
| 9 Temperature             | 295.0                                                |
| 10 Pulse Sequence         | zgpg30                                               |
| 11 Experiment             | 1D                                                   |
| 12 Number of Scans        | 256                                                  |
| 13 Spectrometer Frequency | 75.48                                                |
| 14 Spectral Width         | 21097.0                                              |
| 15 Lowest Frequency       | -1148.2                                              |
| 16 Nucleus                | 13C                                                  |
| 17 Acquired Size          | 16384                                                |
| 18 Spectral Size          | 32768                                                |

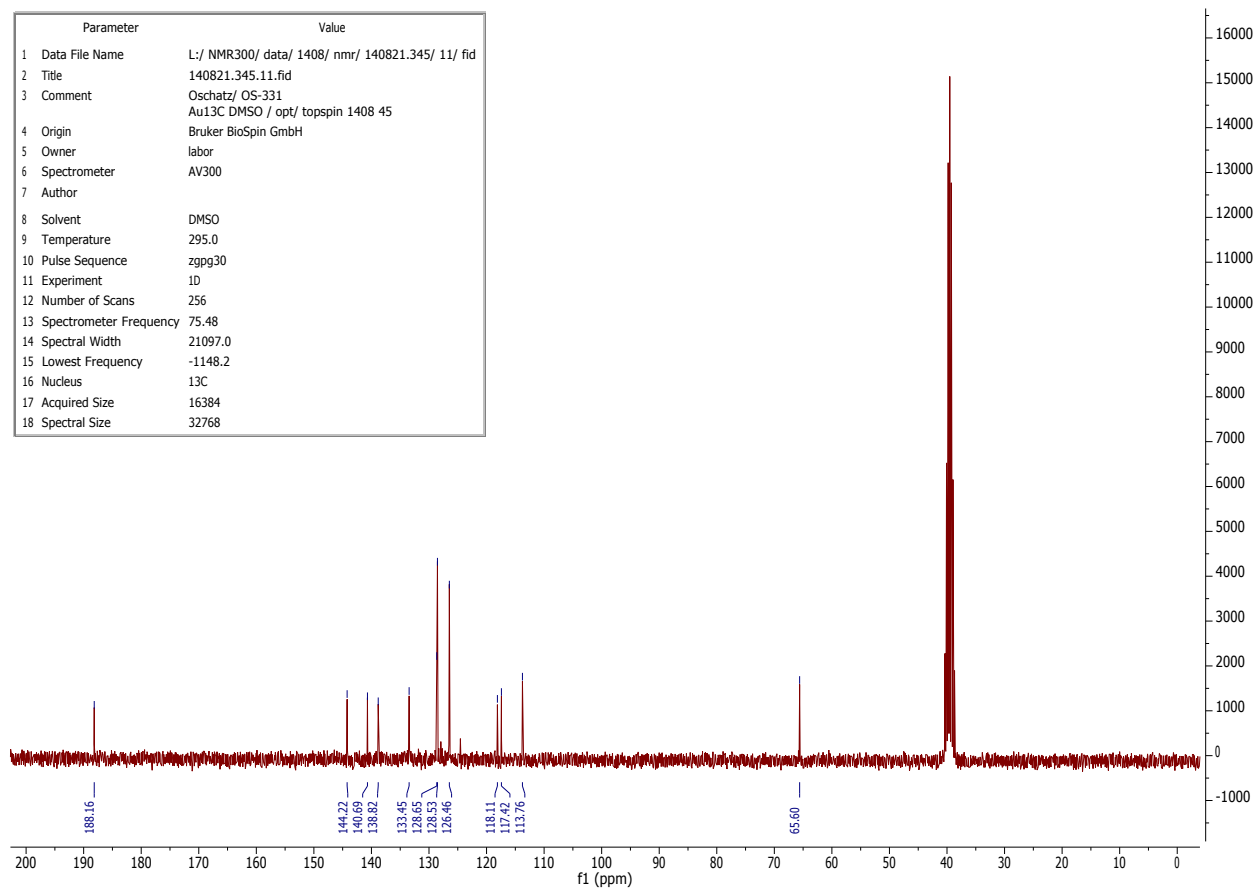

## 2D-coupling pattern of 2a

The H-H-COSY-experiment shows the coupling of both of the nitrogen-attached protons with the hydrogen atom at position 2. Additionally, the NOESY-experiment shows the interaction of the thiolactam-proton with the phenyl ring as well as the interaction of the amine-proton with the hydrogen atoms in position 8 and 10/14 (Fig. 2). These analytical data indicated that the ring closure involves an exocyclic sulfur atom.

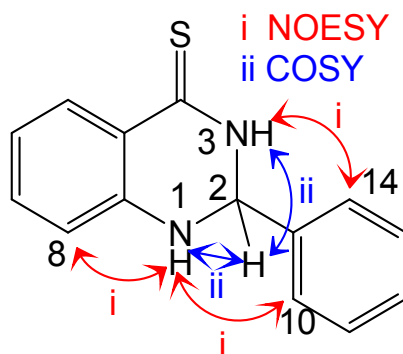

Supplement: c4ob02207f1.pdf [file c4ob02207f1.pdf]
